# Supplementary material for: Archaeological evidence that a late 14th-century tsunami devastated the coast of northern Sumatra and redirected history
Source: PubMed Central journal article supplement (PMC6587673; doi:10.1073/pnas.1902241116), 2019-05-28
Supplement: pnas.1902241116.sapp.pdf [file pnas.1902241116.sapp.pdf]

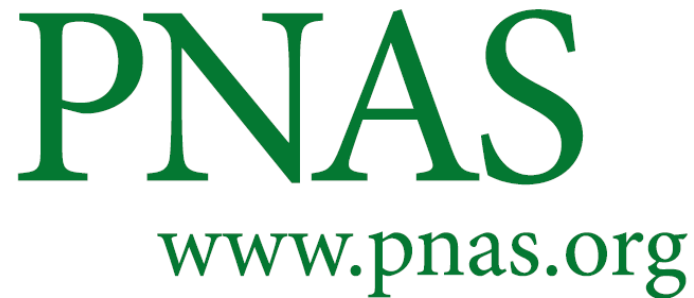

Supplementary Information for:

**Archaeological evidence that a late 14<sup>th</sup>-century tsunami devastated the coast of northern Sumatra and redirected history**

Patrick Daly, Kerry Sieh, Tai Yew Seng, Edmund Edwards McKinnon, Andrew C. Parnell, Ardiansyah, R. Michael Feener, Nazli Ismail, Nizamuddin, Jędrzej Majewski

Corresponding author: Kerry Sieh  
Email: [Kerrysieh@ntu.edu.sg](mailto:Kerrysieh@ntu.edu.sg)

**This PDF file includes:**

Supplementary text  
Figs. S1 to S15  
Tables S1 to S5  
References for SI reference citations

**Other supplementary materials for this manuscript include the following:**

Dataset S1

## Supplementary Information Text

### Gravestone Chronology

We located and documented 5,863 gravestones during the survey. For this paper, we are able to fit 1,866 gravestones within a crude chronology based upon comparative analysis with dated, published gravestones from the region and in a few cases, graves from our survey area that have been dated based upon inscription (1 - 5). On this basis, we have identified 152 gravestones that most likely date to the 15<sup>th</sup> century, another 116 from the late 15<sup>th</sup> century through the early 16<sup>th</sup> century, and 1,598 from the mid-16<sup>th</sup> through the 18<sup>th</sup> century (Table S4). Many of the undated gravestones are simple river-rounded stone markers and non-descript standing slabs that are impossible to directly date. A large percentage of the rest of the currently undated stones most likely belong to the Aceh sultanate period (dating from the early-16<sup>th</sup> century), but more work is needed to refine the gravestone typology and chronology. The categories we use in this paper are sufficient for testing our hypothesis about possible changes to settlement caused by the 1394 and 1450 tsunamis.

### 15<sup>th</sup> Century Gravestones

We found three types of gravestones within the survey area that we believe were produced during the 15<sup>th</sup> century. There is a vernacular style of Muslim gravestone, locally known as *plang pleng*, that is seemingly unique to this section of the Aceh coast. *Plang plengs* are standing squared pillars that taper into a pyramidal apex, usually less than 1 meter in height. All known examples have ornamentation, which can include elaborate floral and/or geometric patterns, and Arabic inscriptions, generally contained within panels near the base of the gravestones (Figure S7). Several clusters of *plang plengs* were previously analyzed by scholars, with 11 containing the date of burial within inscriptions (Table S5) (1). Therefore, we propose

this style of gravestone dates from the early 15<sup>th</sup> through the late 15<sup>th</sup> century. We don't know of any *plang plengs* that have been dated later than the 15<sup>th</sup> century.

We recorded a number of standing squared pillar gravestones that share some characteristics, but are distinct from the *plang pleng* tradition in terms of form and style. While we have not yet obtained any direct dating from the inscriptions on them, they share some characteristics with dated gravestones from Pasai (Figure S8) (1). The examples from Pasai date to 1415 and 1483-4. Based upon stylistic comparison, we feel it is likely that the examples we recorded in our survey zone also date to the 15<sup>th</sup> century, and are most likely indicative of some form of cultural connection between areas in our survey zone and Pasai during the 15<sup>th</sup> century.

We recorded a number of standing slab graves with inward curving sides. While most of these stones are blank, we recorded several that have elaborate ornamentation. The carved gravestones have very clear stylistic similarities with several dated sets of gravestones from Pasai that date between 1430 and 1440 (Figure S9) (1, 5). We therefore feel it is likely that the examples we recorded in our survey zone date to the 15<sup>th</sup> century and are further evidence for cultural connection between residents in our survey zone and Pasai.

### **Late 15<sup>th</sup> – Early 16<sup>th</sup> Century Gravestones**

We recorded two types of gravestones that we suspect date between the late 15<sup>th</sup> through early 16<sup>th</sup> century. Because some of the dated comparative examples from Pasai span the two centuries, we have put them in a distinct chronological category that overlaps with the 15<sup>th</sup> century group. However, we have yet to find any examples of these gravestones that we can date conclusively before the late 15<sup>th</sup> century.

We recorded four thick standing slab gravestones with ornamentation and inscriptions that are virtually identical in style to gravestones from royal tombs in Pasai (Figure S10) (1). Dates from inscriptions in Pasai from stylistically similar gravestones range from 1510 to 1519. We therefore feel it is likely that the examples we recorded in our survey zone date to the early

16<sup>th</sup> century and are further evidence for cultural connection between residents in our survey zone and Pasai.

We recorded gravestones that we initially categorized as *plang pleng* grave markers based upon stylistic similarities. More detailed analysis has led us to suspect that there is a later type of *plang pleng* that dates from the late 15<sup>th</sup> through early 16<sup>th</sup> century. This is based upon several observations: 1) some *plang plengs* are much more homogenous in terms of physical characteristics than the types of *plang plengs* that have dated inscriptions; 2) the ‘later’ *plang plengs* are not found in association with any gravestones that are dated to the 15<sup>th</sup> century, but are found in association with graves dated to the late 15<sup>th</sup> – early 16<sup>th</sup> century (and later); and 3) we have found several unique examples of graves which seem to share characteristics of the ‘later’ *plang pleng* style and some of the early *batu Aceh* gravestones (Figure S11). This leads us to speculate that some types of *plang plengs* are younger than the dated *plang plengs* and fall into the period immediately before the Aceh sultanate developed. We did not include these grave sites on the map in the main text because our dating is highly circumstantial and not yet robust enough to go beyond speculation.

### **Mid 16<sup>th</sup> – Late 18<sup>th</sup> Century Gravestones**

There are well-documented traditions of gravestones associated with the Aceh Sultanate called *batu Aceh*. These vary considerably in terms of size, shape and ornamentation and are found throughout areas that fell under the Aceh sultanate, including northern Sumatra, and the Malay/Thai peninsula (6 - 7). Several of the main styles of *batu Aceh* have been dated on the basis of inscriptions, with the main period of their production spanning the mid 16<sup>th</sup> century through the 18<sup>th</sup> century.

One of the most distinctive styles of *batu Aceh* are ‘winged’ slab stones, often with extensive ornamentation and inscriptions. Within this broad category we found an extensive variety of stones (Figure S12). Based upon comparison with dated published gravestones, we

consider these to date from the mid 16<sup>th</sup> century through the 18<sup>th</sup> century. Published accounts demonstrate that there are early examples of ‘winged’ slabs that date to the 15<sup>th</sup> century from Pasai (5 - 7). However, we did not identify similar stones in our survey zone, leading us to conclude that only later versions of this style of gravestone are present within our survey zone.

We recorded squared pillar stones, with elaborate bases, extensive ornamentation and multi-tier finials that are associated with the Aceh sultanate (Figure S13). Published dated examples suggest that this style dates from the late 16<sup>th</sup> century, possibly running through the 17<sup>th</sup> century (2 - 4).

We recorded vertical slab gravestones, with curved shoulders, multi-tier finials, and often elaborate ornamentation that are associated with the Aceh sultanate (Figure S14). Published dated examples suggest that this style dates from the mid to late 16<sup>th</sup> century (4).

We recorded gravestones that consist of vertical columns with six or eight edged faces, some with ornamentation. Several similar gravestones have been associated with the Aceh sultanate (Figure S15). Published dated examples suggest that gravestones in our survey area that are of this style date from the late 16<sup>th</sup> century (3 – 4).

## **Ceramics Chronology**

We dated the trade ceramics recovered during our survey based upon dated reference collections obtained from shipwrecks, archaeological investigations, and museum collections. We were able to assign a geographic source and date range of production to 61% of the ceramic sherds found in our survey area. Working with the ceramic data is complicated by the wide variety of date ranges for different types of ceramics. We recovered several sherds that we could date precisely to a specific year (based upon a stamped date). However, most of the sherds had date ranges that spanned decades, and in some cases, centuries.

We applied a statistical model to the ceramic dataset to calculate probable activity levels for

each year, using the BchronDensityFast function in the Bchron software package (8 – 9). The BchronDensityFast function estimates activity levels from large sets of date ranges by first sub-sampling the dates, and then using the Mclust density estimation procedure (10 – 11) to fit the dates within a normal distribution. The output of the BchronDensityFast model is an estimate, for each age period of the activity level measured as a probability density and so summing to 1. This can subsequently be interpreted as showing periods of high and low relative activity, especially when compared across different groups.

By default Bchron only accepts either radiocarbon or normally distributed dates, whereas the present data set contained dates only defined on a uniform interval. For that reason all dates were converted so that the uniform range was re-expressed as a 99% confidence interval for a normally distributed date. In general, the BchronDensityFast function can be seen as a more sophisticated density estimation method to that of the SUM functions currently implemented in OxCal (12).

## Supplementary Figures

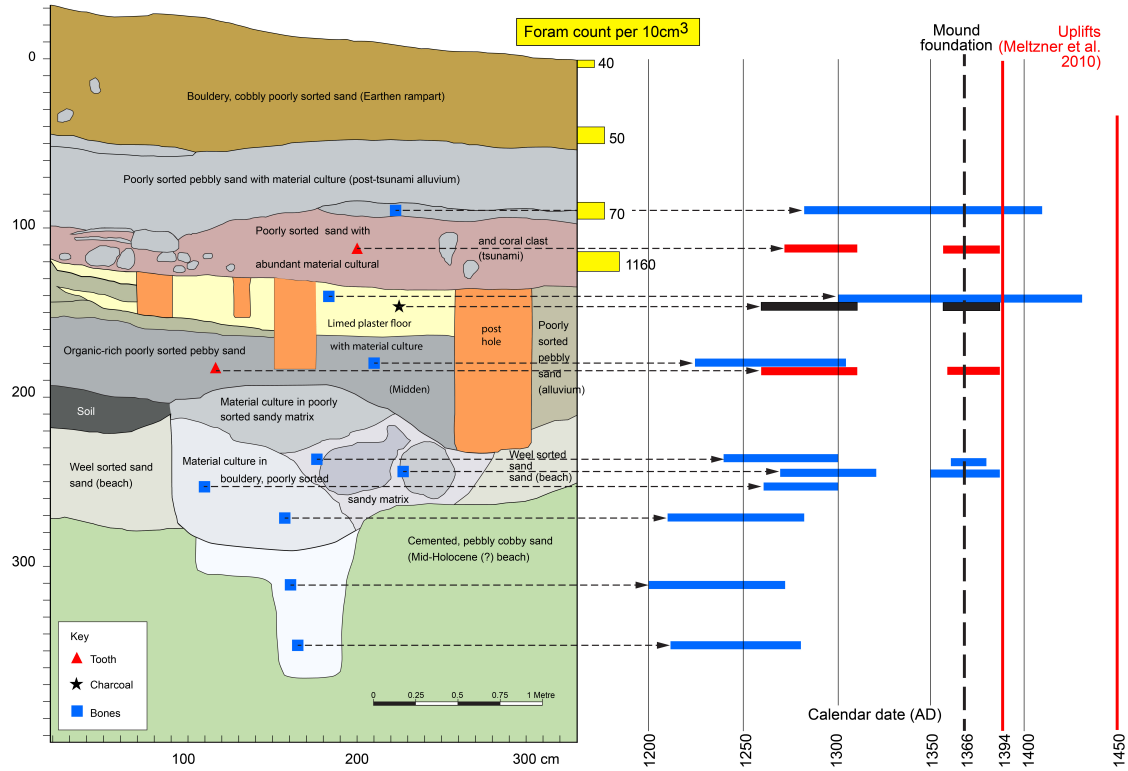

**Fig. S1.** Exposure of cultural layers and natural deposits in a beach cliff below the elevated headland in Cluster 10 (Lamri) revealed two centuries of occupation before destruction of a small structure by a tsunami soon after 1366±3 C.E. A 14<sup>th</sup>-century lime plaster floor (yellow) covers a 13<sup>th</sup>- to 14<sup>th</sup>-century rubbish pit (gray). A layer rich in foraminifera tests (a form of marine microfossil) and coral (pink) overlies the floor, providing evidence of marine overwash consistent with a tsunami. The uppermost layer is a man-made earthen ridge built parallel to the cliff. Blue squares, red triangles, and the black star correspond to samples with radiocarbon ages (black horizontal lines) at corresponding dates on right. The red lines indicate the two uplift events documented by Meltzner et al 2010 (13). From Sieh et al 2015 (14).



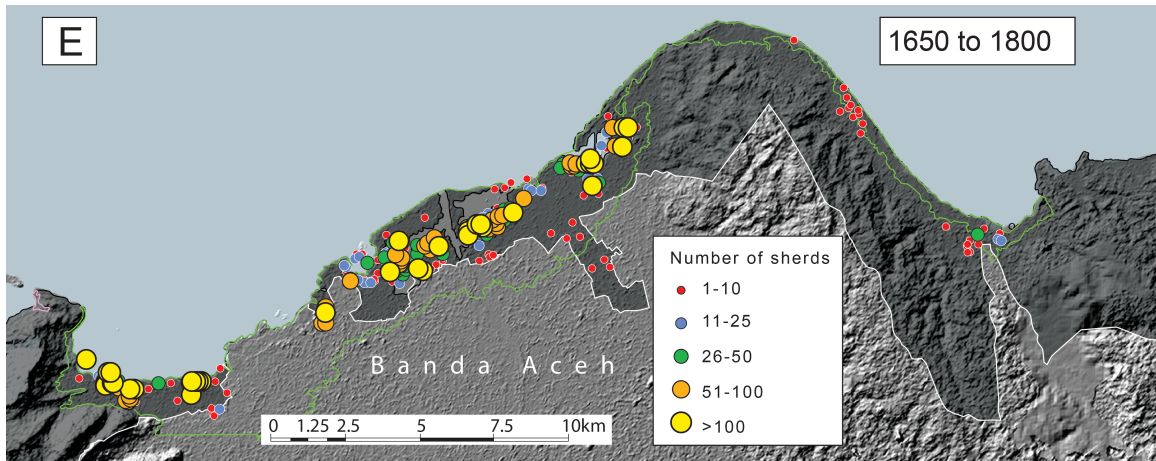

**Fig. S2.** Distribution and abundance of ceramics for the period 1650-1800. The data show a continuation of the trend in Figure 2 toward increasing density of settlement along the western side of the survey zone. The apex of the Aceh sultanate occurred during this time period.

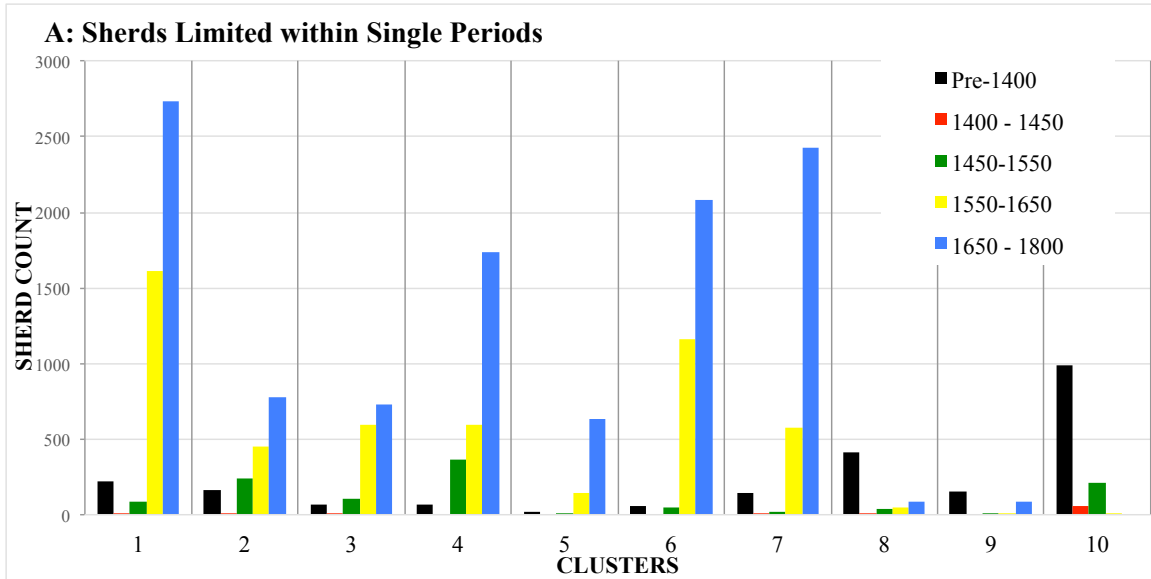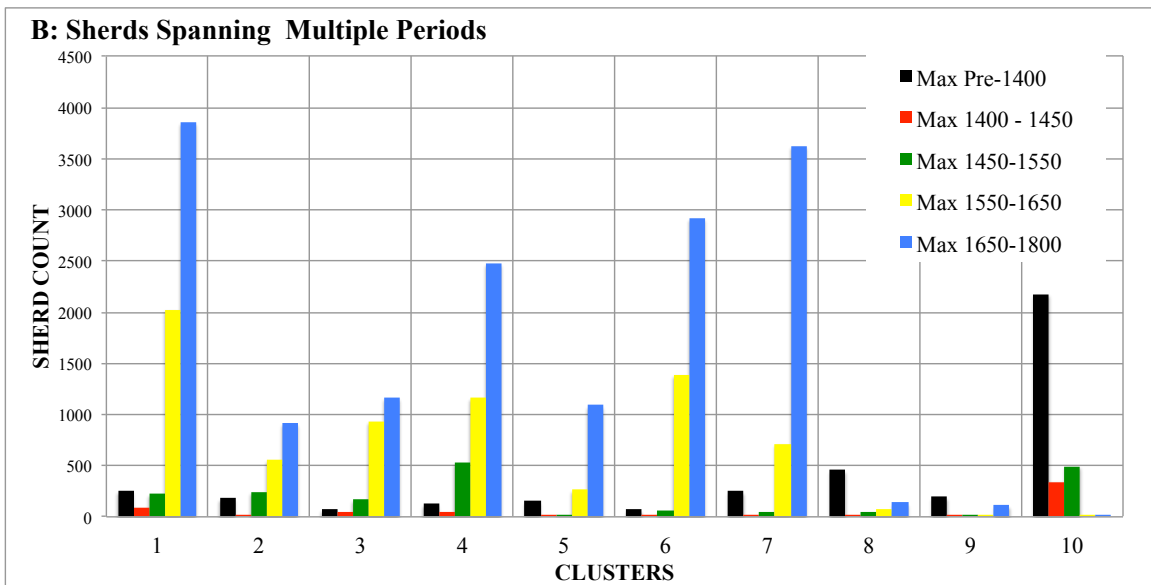

**Fig. S3.** Sherd count by period and cluster. *A.* Counts only of material that was definitely produced within a single time period. *B.* Counts of all material, including sherds for which the production date can range across more than one of the time periods. These materials are counted in each of the periods during which they might have been produced. Figure S3B thus gives a maximum limit for sherd counts for each period.

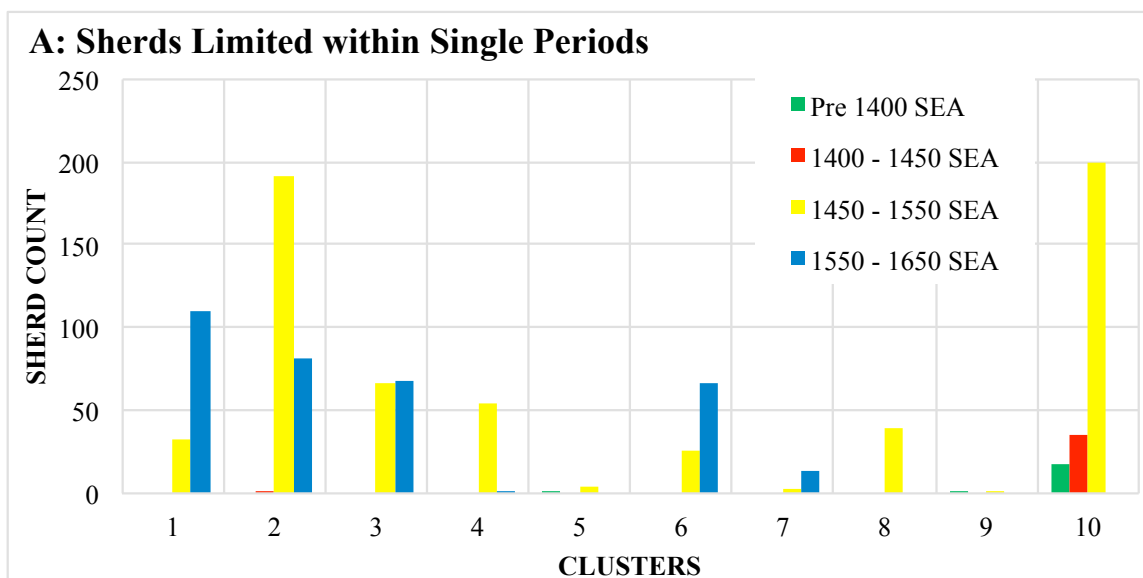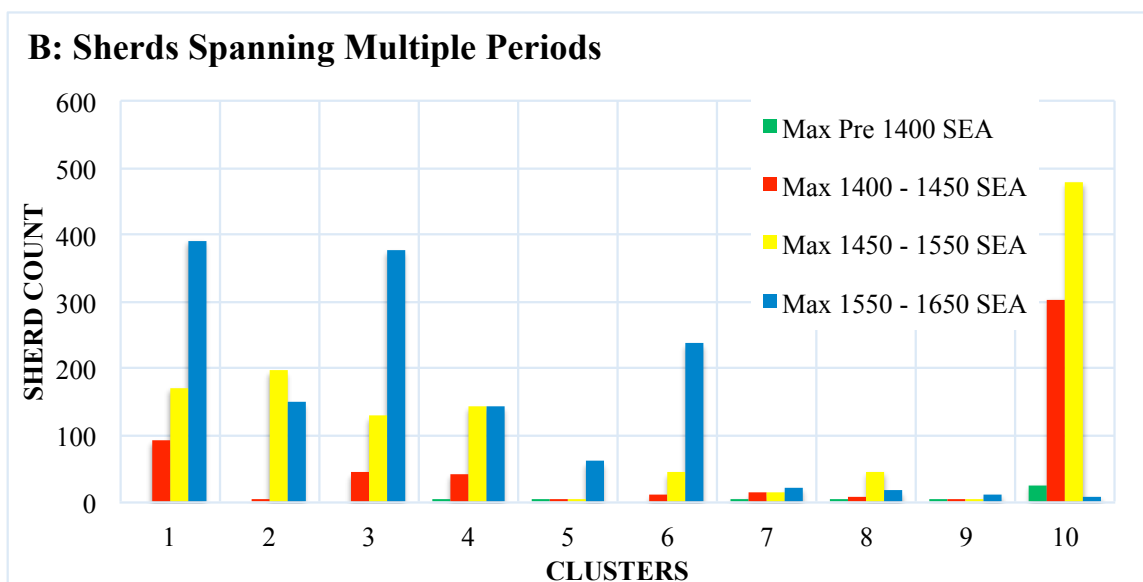

**Fig. S4.** Distribution of Southeast Asian trade ceramics by cluster, including all ceramics from Burma, Thailand and Vietnam. *A.* Only includes material definitely produced during one of the time periods. *B.* Counts of all material, including that which is not constrained within one of the time periods. These materials are counted in more than one period. Figure S4b thus gives a maximum limit for sherd counts for each period.

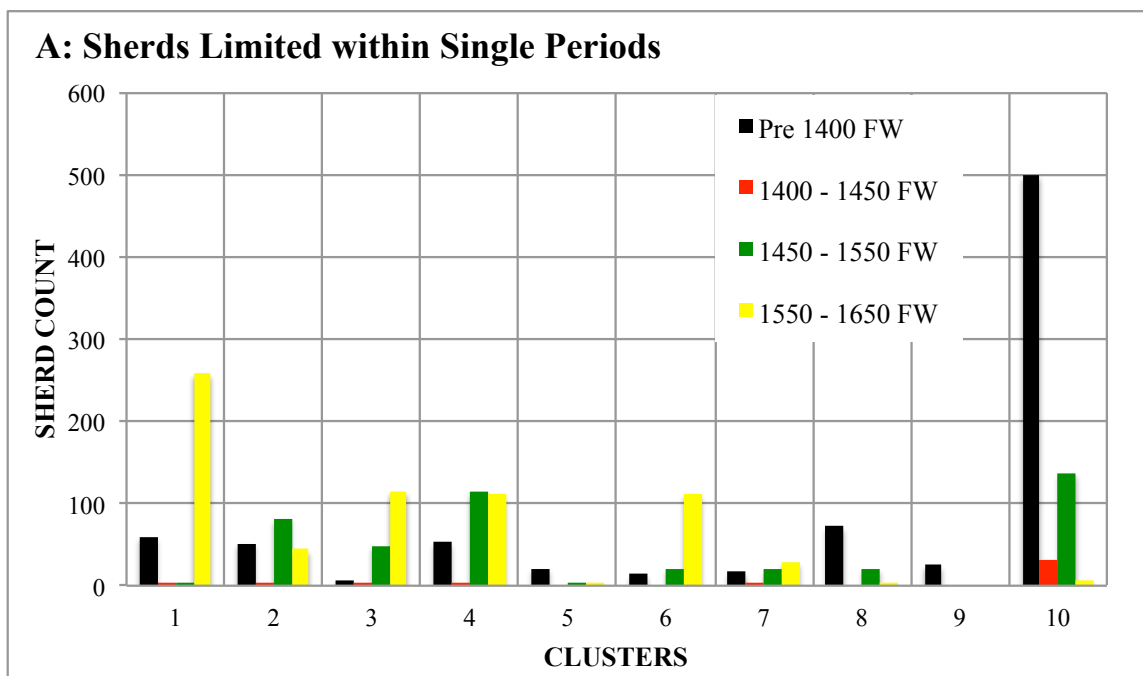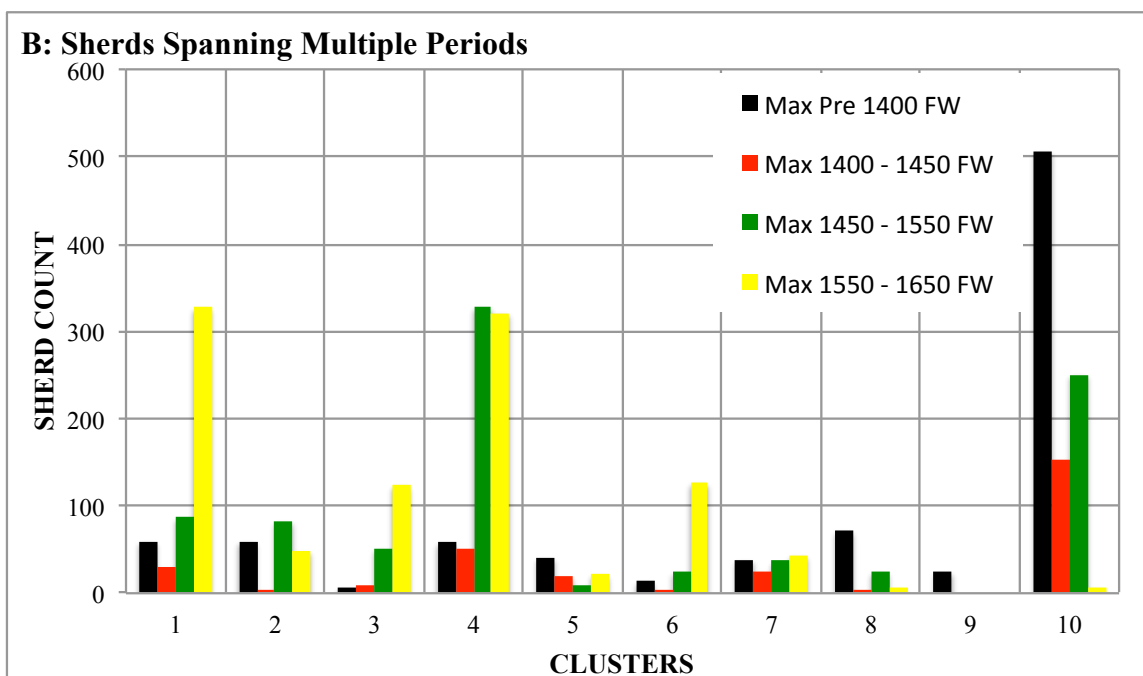

**Fig. S5.** Distribution Fine Ware (FW) ceramics by cluster. *A.* Includes only material that was certainly produced within one of the time periods. *B.* Counts of all material, including that which is not constrained within one of the time periods. These materials are counted in more than one period. Thus Figure S5B gives a maximum limit for sherd counts for each period.

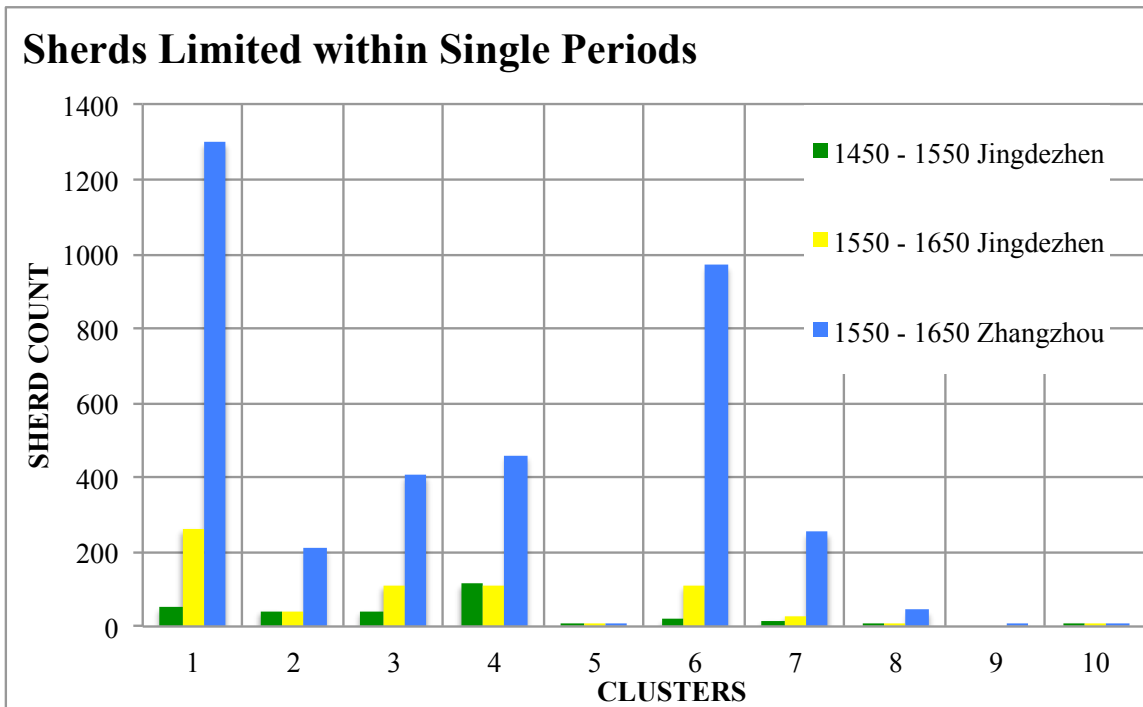

**Fig. S6.** Distribution of Chinese trade ceramics from the Jingdezhen and Zhangzhou production centers by cluster. Only includes material that fits within the time periods without overlap. Importantly, several types of distinctive and prominent Chinese trade ceramics that date after 1506 are barely present in Clusters 8 – 10, the former center for trade with China.

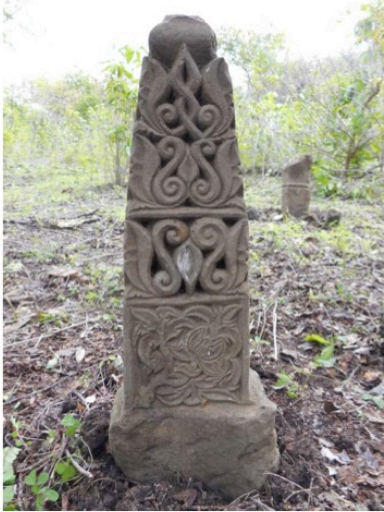

*AB-LHR-30-GS3 N Face*  
 16cm across 14cm thick 78cm tall  
 N: 05 36' 41.6"  
 E: 095 31' 54.3"

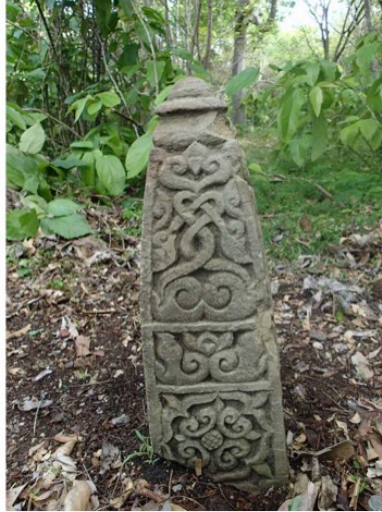

*AB-LHR-10-GS1 SW Face*  
 15cm across 11cm thick 46cm tall  
 N: 05 36' 39.6"  
 E: 095 31' 47.8"

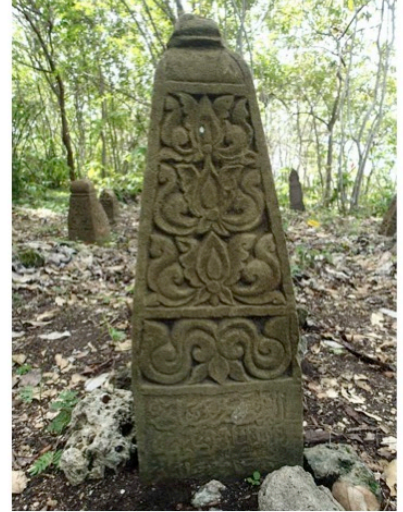

*AB-LHR-10-GS8 N Face*  
 19cm across 15cm thick 58cm tall  
 N: 05 36' 39.7"  
 E: 095 31' 47.7"

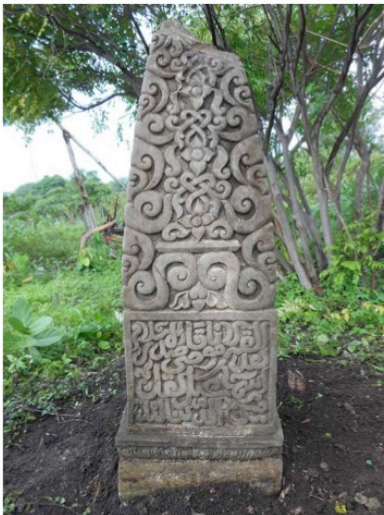

*AB-LHR-50-GS1 N Face*  
 27cm across 23cm thick 87cm tall  
 N: 05 36' 13.1"  
 E: 095 32' 01.2"

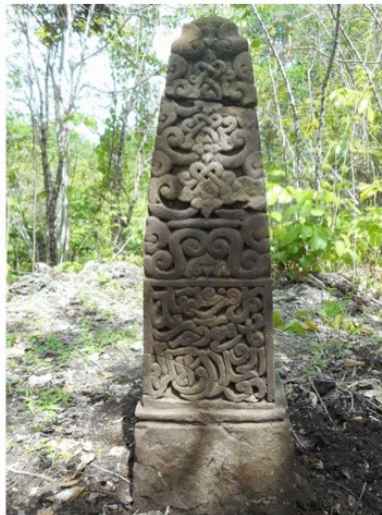

*AB-LHR-24-GS1 S Face*  
 24cm across 24cm thick 110cm tall  
 N: 05 36' 44.1"  
 E: 095 31' 51.0"

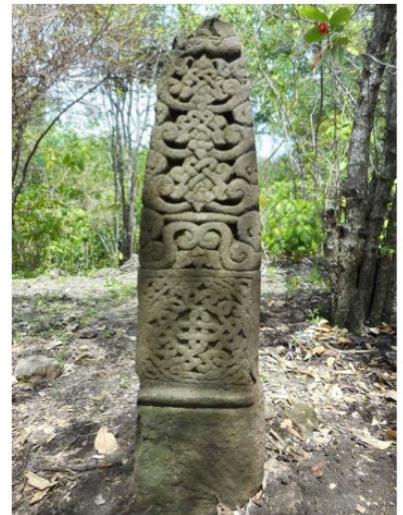

*AB-LHR-24-GS2 S Face*  
 24cm across 24cm thick 110cm tall  
 N: 05 36' 44.1"  
 E: 095 31' 51.1"

**Fig. S7.** Examples of *plang pleng* style gravestones recovered in our survey. All six of these are from the Lambaro headlands, that is within Cluster 10.

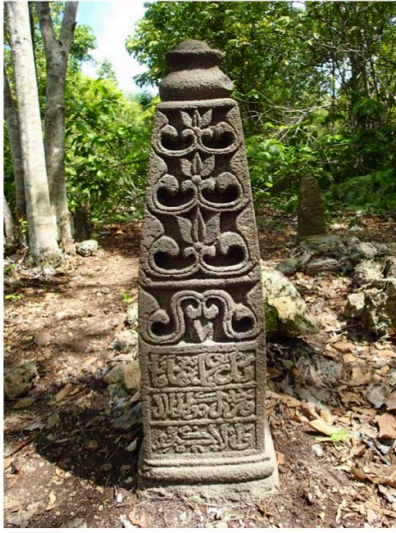

*AB-LHR-10-GS13 S Face*  
 19cm across 16cm thick 70cm tall  
 N: 05 36' 39.6"  
 E: 095 31' 47.6"

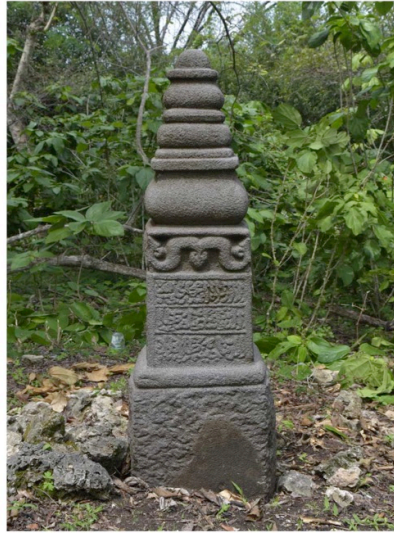

*AB-LRH-44-GS1 SE Face*  
 28cm across 23cm thick 122cm tall  
 N: 05 36' 29.70"  
 E: 095 32' 00.79"

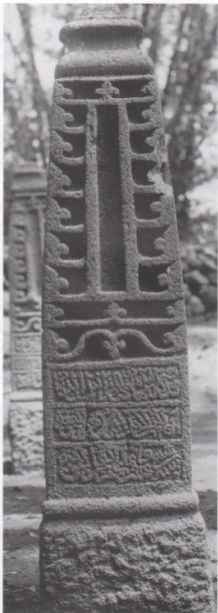

Kuta Kareung Cemetery  
 Tomb KK21 S. 1 & 2 Faces A  
 Date: 1415  
 Reference: Guillot & Kalus 2008

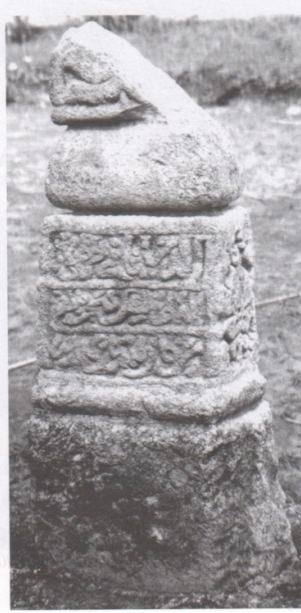

Tomb: TK I 05  
 Date: 1483-84  
 Reference: Guillot & Kalus 2008  
 Original Photo: Guillot & Kalus 2002

**Fig. S8.** Gravestones from our survey (top row) and 15<sup>th</sup>-century gravestones from Pasai (bottom row) are similar enough to imply that they date from the same period. Published examples from Guillot & Kalus 2008 (1).

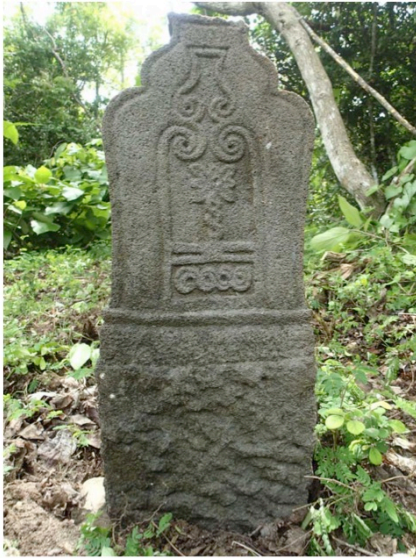

*AB-LHR-41-GS1 NW Face*

23cm across 8cm thick 63cm tall  
 N: 05 36' 30.5"  
 E: 095 31' 56.7"

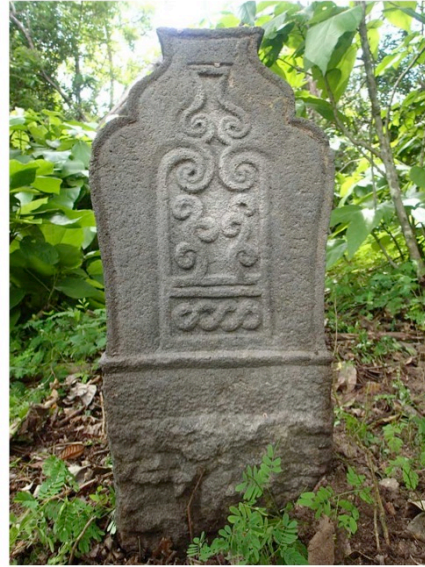

*AB-LHR-41-GS2 N Face*

24cm across 9cm thick 51cm tall  
 N: 05 36' 30.4"  
 E: 095 31' 56.7"

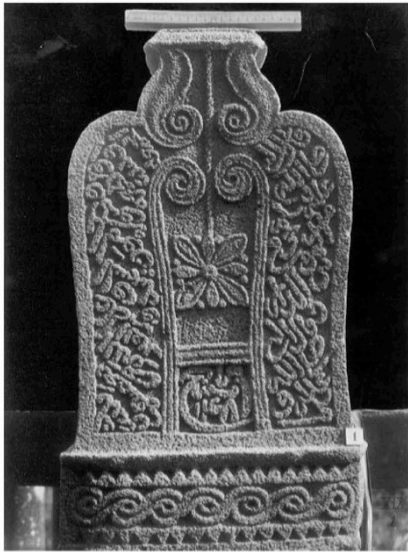

Teungku Sareh

Grave XIX (pair of stones)

Date: 1437

Reference: Lambourne 2004 p.  
 223-5

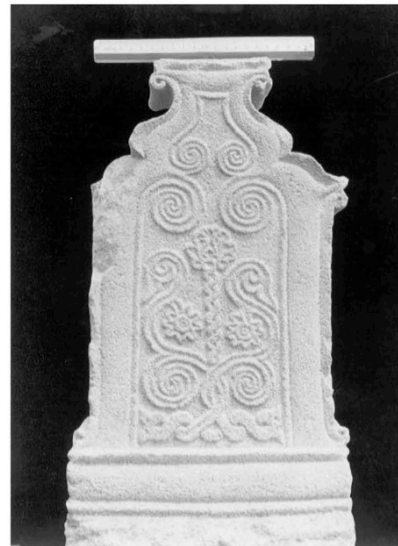

Peuet Ploh Peuet

Grave X (pair of stones)

Date: 1430

Reference: Lambourne 2004 p. 221-2

**Fig. S9.** Similarity in shape and decorative motifs between standing slab gravestones with curved sides from our survey (top row) and gravestones from Pasai dated to the 15<sup>th</sup> century (bottom row) imply that they date from the same period. Published examples from Lambourne 2004 (5).



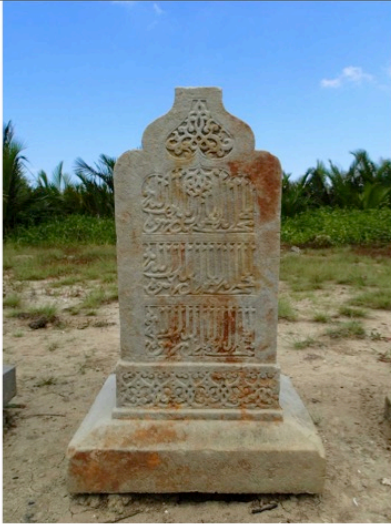

*BA-PND-24-GS13 S Face*  
 31cm across 20cm thick 79cm tall  
 N: 05 33' 58.4"  
 E: 095 18' 44.5"

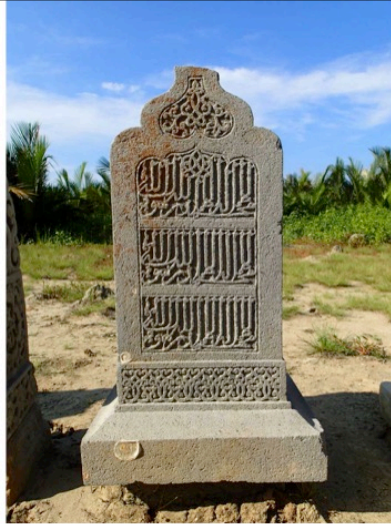

*BA-PND-24-GS15 S Face*  
 31cm across 21cm thick 83cm tall  
 N: 05 33' 58.4"  
 E: 095 18' 44.5"

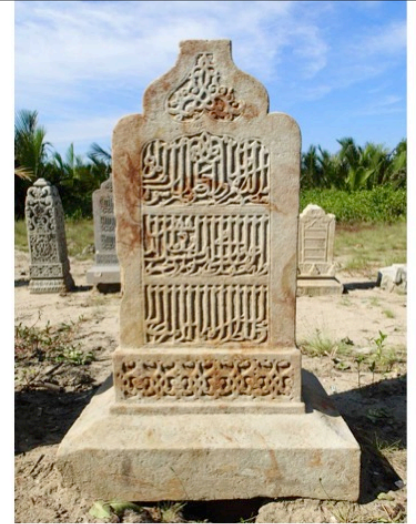

*BA-PND-24-GS14 S Face*  
 31cm across 20cm thick 75cm tall  
 N: 05 33' 58.3"  
 E: 095 18' 44.5"

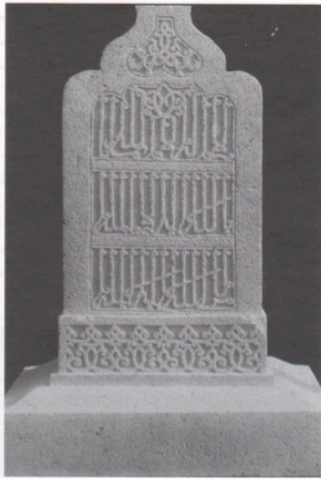

Tungku di Bale Cemetery  
 Tomb: TB 16  
 Date: 1517  
 Reference: Guillot & Kalus 2008

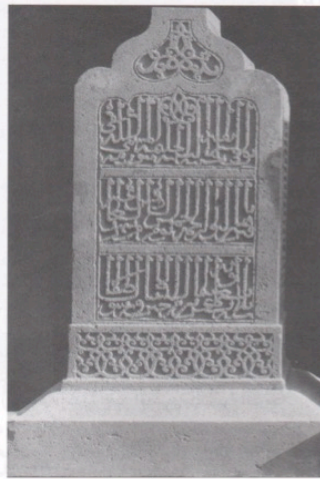

Tungku di Bale Cemetery  
 Tomb: TB 17  
 Date: 1517  
 Reference: Guillot & Kalus 2008

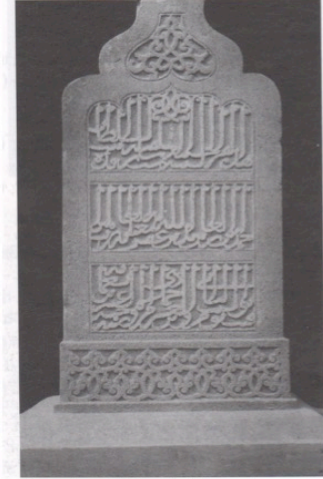

Tungku di Bale Cemetery  
 Tomb: TB 50  
 Date: 1519  
 Reference: Guillot & Kalus 2008

**Fig. S10.** Comparison of thick standing slab gravestones from our survey (top row) and gravestones from Pasai dated to the second decade of the 16<sup>th</sup> century. The shape and ornamentation are virtually identical. Our examples above come from the western part of our study area, within the city of Banda Aceh. Published examples from Guillot & Kalus 2008 (1).

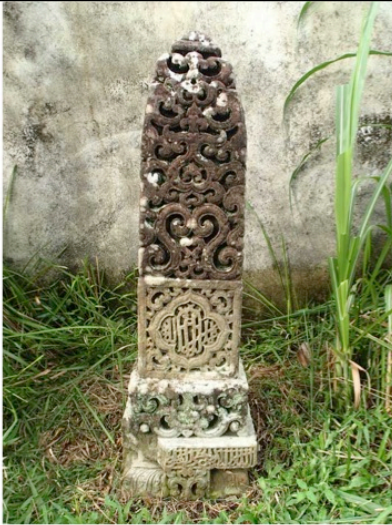

**BA-LTH-1-GS10**  
 29cm across 34cm thick 89cm tall  
 N: 05 32' 49.6"  
 E: 095 20' 40.1"

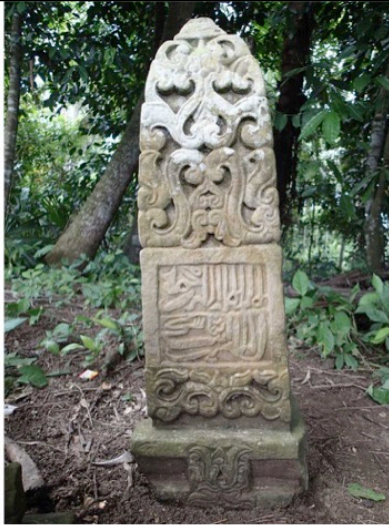

**AB-LBT-1-GS1**  
 23cm across 19cm thick 68cm tall  
 N: 05 30' 33.3"  
 E: 095 19' 59.1"

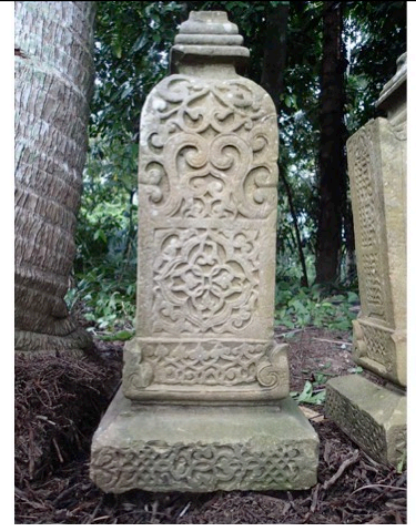

**AB-LBT-1-GS3**  
 27cm across 23cm thick 83cm tall  
 N: 05 30' 33.3"  
 E: 095 19' 59.2"

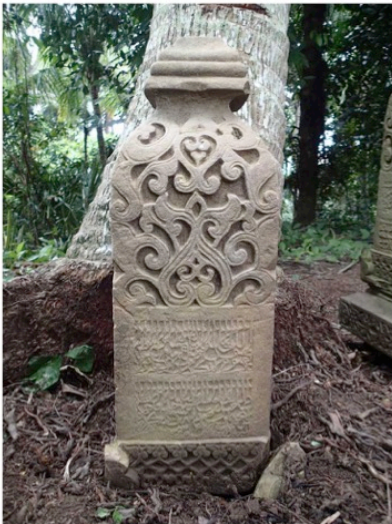

**AB-LBT-1-GS5**  
 21cm across 20cm thick 63cm tall  
 N: 05 30' 33.5"  
 E: 095 19' 59.1"

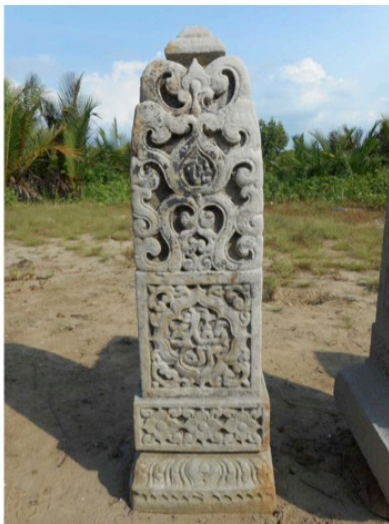

**BA-PND-24-GS17**  
 19cm across 19cm thick 80cm tall  
 N: 05 33' 58.4"  
 E: 095 18' 44.5"

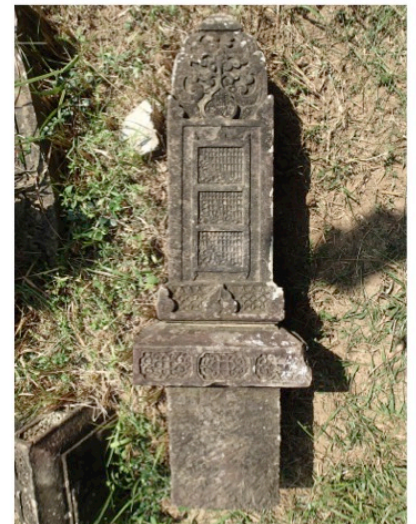

**AB-MRK-1-GS1**  
 27cm across 27cm thick 120cm tall  
 N: 05 32' 11.8"  
 E: 095 21' 21.5"

**Fig. S11:** Examples of what we believe are a post-15<sup>th</sup> century version of the *plang pleng* style of gravestones. These stones demonstrate more refined craftsmanship and incorporate elements, such as bases and finials, that are common elements of gravestone styles from the Aceh sultanate.

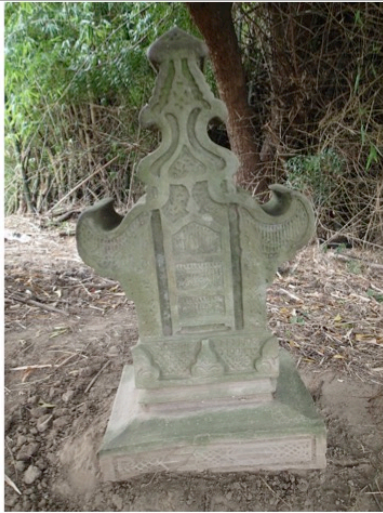

*AB-KJH-33-GS4*  
 24cm across 17cm thick 78cm tall  
 N: 05 35' 41.4"  
 E: 095 23' 00.0"

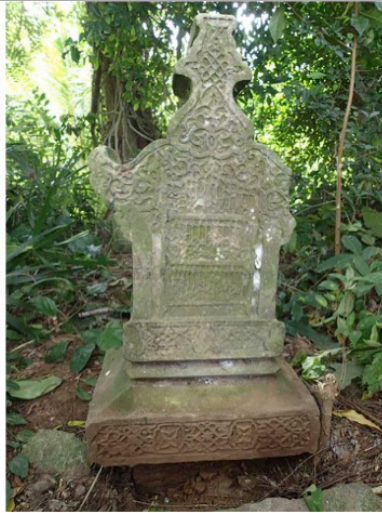

*AB-LBY-6-GS5*  
 38cm across 27cm thick 79cm tall  
 N: 05 36' 44.3"  
 E: 095 24' 18.2"

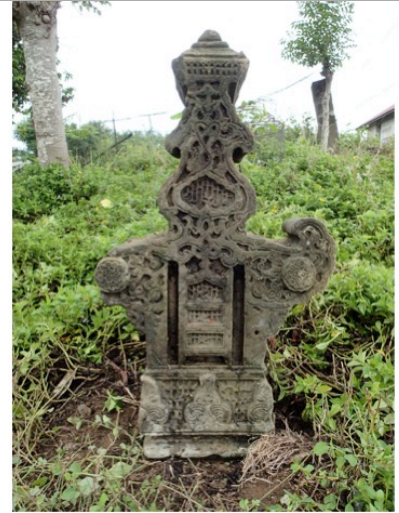

*AB-GBO-1-GS3*  
 42cm across 23cm thick 85cm tall  
 N: 05 32' 42.2"  
 E: 095 16' 34.2"

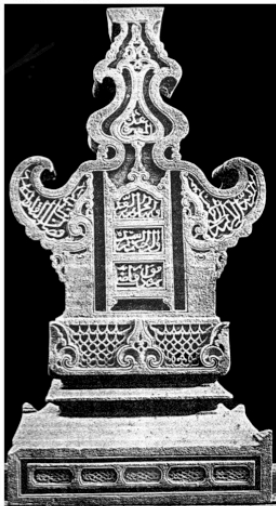

Tuan Meurah Cemetery  
 Tomb 1  
 Date: 1578  
 Reference: Kalus & Guillot 2016

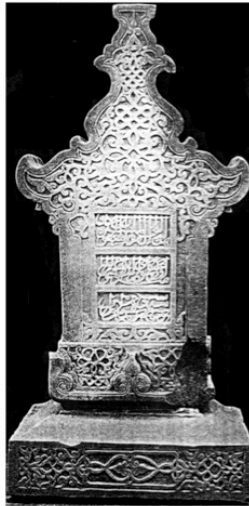

Blang Tutung Cemetery  
 Tomb 4  
 Date: 1549  
 Reference: Kalus & Guillot 2016

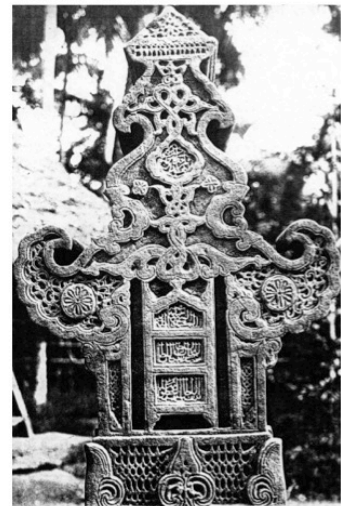

Kandang Said Cemetery  
 Tomb 3  
 Date: 1589  
 Reference: Kalus & Guillot 2017

**Fig. S12.** Comparison of 'winged' gravestones from our survey (top row) and examples from the region that date from the late 16<sup>th</sup> century. Published examples from Kalus & Guillot 2016, 2017 (3 – 4).

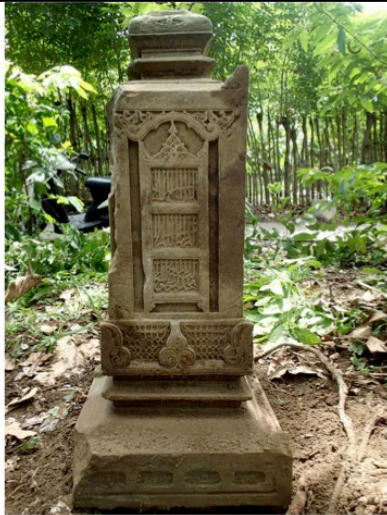

*AB-LTT-2-GS9*  
 29cm across 29cm thick 104cm tall  
 N: 05 32' 35.3"  
 E: 095 15' 17.1"

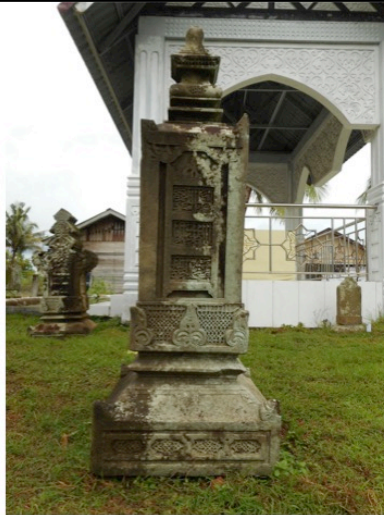

*BA-PND-1-GS50*  
 39cm across 39cm thick 171cm tall  
 N: 05 34' 16.2"  
 E: 095 18' 49.9"

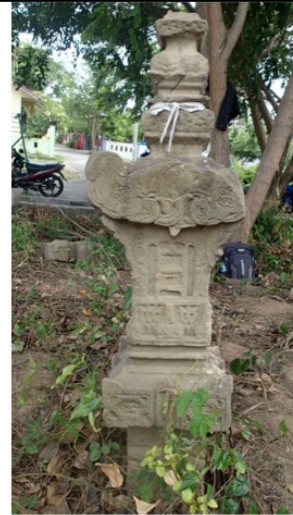

*BA-LPO-45-GS14*  
 32cm across 32cm thick 103cm tall  
 N: 05 34' 35.6"  
 E: 095 19' 28.6"

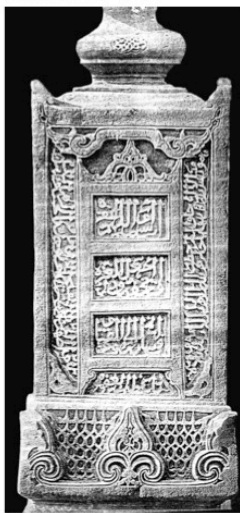

Cot Ba Beum Cemetery  
 Tomb 2  
 Date: 1579  
 Reference: Kalus & Guillot 2016

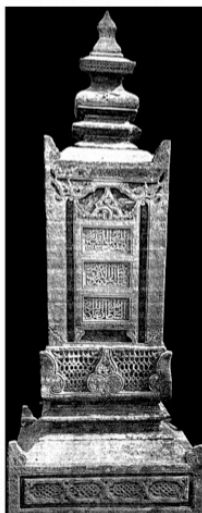

Tuan di Kandang Cemetery  
 Tomb 34  
 Date: 1589  
 Reference: Kalus & Guillot 2014

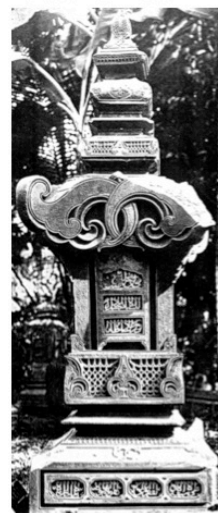

Kandang Kampung Punge Cemetery  
 Tomb 2  
 Date: 1593-94  
 Reference: Kalus & Guillot 2017

**Fig. S13.** Comparison of squared gravestones from our survey (top row) examples from the region dated to the late 16<sup>th</sup> century. Published examples from Kalus & Guillot 2014, 2016, & 2017 (2 – 4).

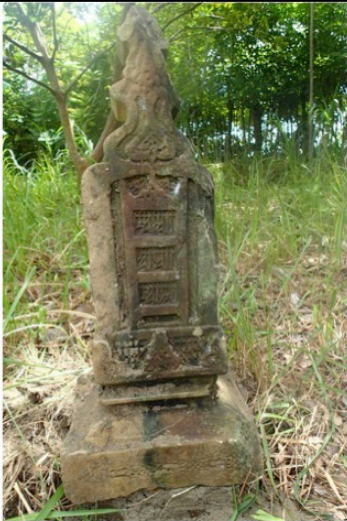

*AB-LTT-12-GS12 S Face*  
 20cm across 14cm thick 78cm tall  
 N: 05 32' 38.30"  
 E: 095 15' 18.77"

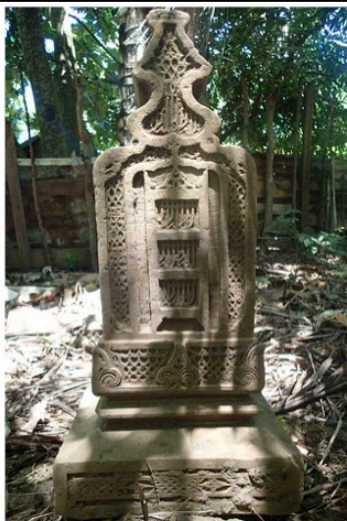

*AB-LTT-14-GS9 N Face*  
 23cm across 16cm thick 76cm tall  
 N: 05 32' 36.4"  
 E: 095 15' 19.4"

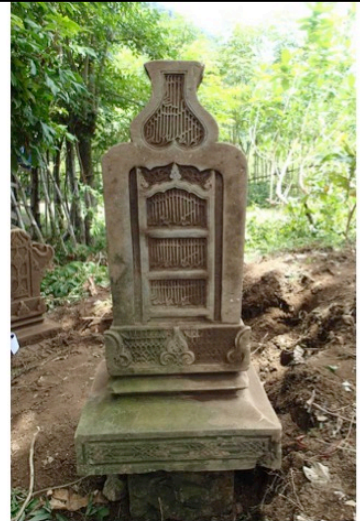

*AB-LTT-2-GS17 N Face*  
 28cm across 18cm thick 105cm tall  
 N: 05 32' 35.2"  
 E: 095 15' 16.7"

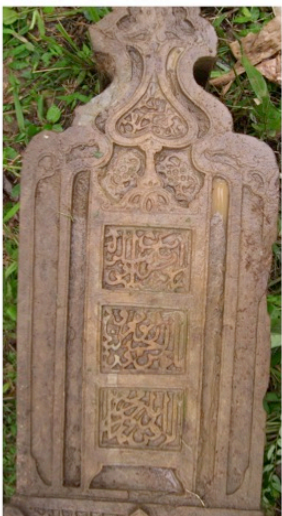

Jarat Ba Lume Cemetery  
 Tomb 6  
 Date: 1585  
 Reference: Kalus & Guillot 2017

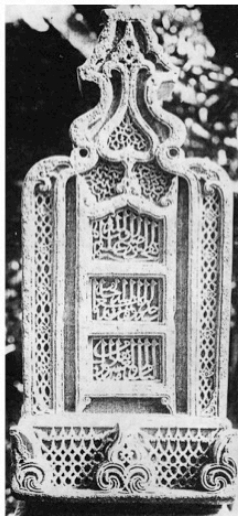

Jarat Ba Lume Cemetery  
 Tomb 13  
 Date: 1574  
 Reference: Kalus & Guillot 2017

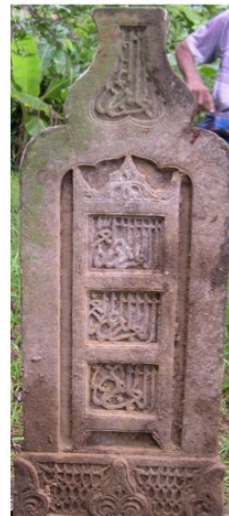

Jarat Ba Lume Cemetery  
 Tomb 22  
 Date: 1585  
 Reference: Kalus & Guillot 2017

**Fig. S14.** Comparison of vertical slab gravestones with finials from our survey (top row) and examples from the region dated to the late 16<sup>th</sup> century. Published examples from Kalus & Guillot 2017 (4).

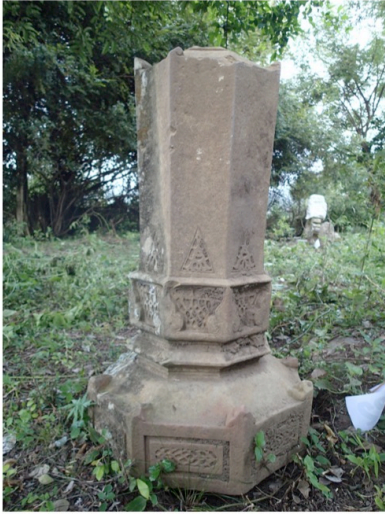

*AB-LUJ-19-GS22*  
 21cm dia. 86cm tall  
 N: 05 37' 16.2"  
 E: 095 24' 29.9"

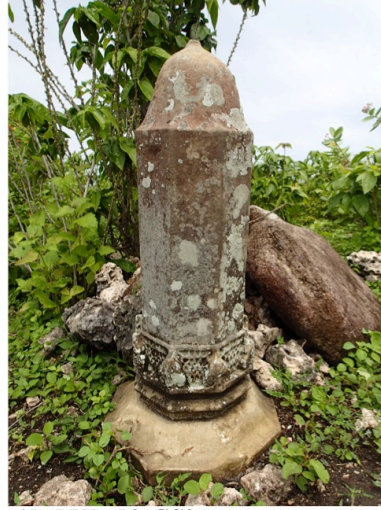

*AB-LHR-59-GS2*  
 23cm dia. 75cm tall  
 N: 05 36' 34.1"  
 E: 095 32' 05.4"

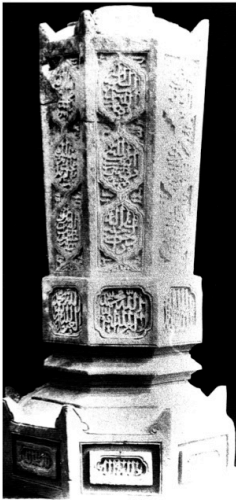

Tungku Glompang Cemetery  
 Tomb 1  
 Date: No 1587  
 Reference: Kalus & Guillot 2016

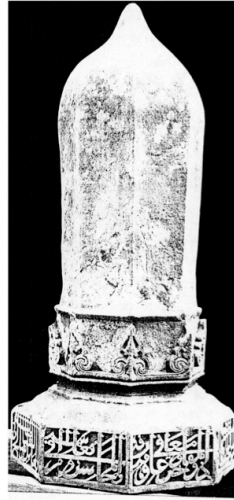

Tungku Syeh Aircam Cemetery  
 Tomb 1  
 Date: 1584  
 Reference: Kalus & Guillot 2017

**Fig. S15.** Comparison of hex and octagonal column gravestones from our survey (top row) with examples from the region dated to the late 16<sup>th</sup> century. Published examples from Kalus & Guillot 2016 & 2017 (3 – 4).

## Supplementary Tables

**Table S1.** Quantity of ceramics sherds dated with confidence by period for each cluster. Showing total count of entire assemblage, count of all sherds of ‘high class’ fine wares, and count of sherds of large jars.

| Period     | Total Count |             |             |             |             | Fine Ware |             |             |             |             | Large Jars |             |             |             |
|------------|-------------|-------------|-------------|-------------|-------------|-----------|-------------|-------------|-------------|-------------|------------|-------------|-------------|-------------|
|            | Pre 1400    | 1400 - 1450 | 1450 - 1550 | 1550 - 1650 | 1650 - 1800 | Pre 1400  | 1400 - 1450 | 1450 - 1550 | 1550 - 1650 | 1650 - 1800 | Pre 1400   | 1400 - 1450 | 1400 - 1550 | 1550 - 1750 |
| Cluster 1  | 216         | 2           | 84          | 1613        | 2737        | 60        | 2           | 4           | 258         | 861         | 123        | 0           | 27          | 222         |
| Cluster 2  | 165         | 6           | 240         | 453         | 774         | 52        | 2           | 81          | 44          | 228         | 38         | 0           | 0           | 34          |
| Cluster 3  | 69          | 1           | 107         | 591         | 727         | 7         | 1           | 49          | 115         | 304         | 49         | 0           | 23          | 250         |
| Cluster 4  | 70          | 0           | 368         | 594         | 1740        | 53        | 2           | 115         | 112         | 486         | 7          | 0           | 0           | 312         |
| Cluster 5  | 23          | 0           | 5           | 144         | 631         | 21        | 0           | 5           | 5           | 81          | 0          | 0           | 0           | 55          |
| Cluster 6  | 54          | 0           | 45          | 1157        | 2084        | 14        | 0           | 21          | 112         | 452         | 44         | 0           | 10          | 192         |
| Cluster 7  | 148         | 2           | 23          | 572         | 2426        | 17        | 2           | 19          | 29          | 337         | 8          | 2           | 0           | 283         |
| Cluster 8  | 412         | 1           | 41          | 48          | 90          | 72        | 0           | 21          | 4           | 9           | 266        | 1           | 5           | 10          |
| Cluster 9  | 151         | 0           | 2           | 8           | 89          | 25        | 0           | 0           | 0           | 5           | 46         | 0           | 1           | 12          |
| Cluster 10 | 985         | 60          | 210         | 6           | 0           | 499       | 31          | 137         | 6           | 0           | 1092       | 6           | 106         | 8           |
| Total      | 2293        | 72          | 1125        | 5186        | 11298       | 820       | 40          | 452         | 685         | 2763        | 1673       | 9           | 172         | 1378        |

**Table S2.** Quantity of diagnostic Chinese trade ceramics, dated with confidence by period for each cluster. Showing total count of material from production centers in the Longquan, Jingdezhen, and Zhangzhou provinces.

| Period     | Longquan |             | Jingdezhen  |             | Zhangzhou   |
|------------|----------|-------------|-------------|-------------|-------------|
|            | Pre 1400 | 1400 - 1450 | 1450 – 1550 | 1550 - 1650 | 1550 - 1650 |
| Cluster 1  | 60       | 2           | 51          | 262         | 1298        |
| Cluster 2  | 50       | 2           | 43          | 42          | 211         |
| Cluster 3  | 5        | 1           | 41          | 112         | 407         |
| Cluster 4  | 48       | 0           | 113         | 112         | 460         |
| Cluster 5  | 21       | 0           | 5           | 6           | 1           |
| Cluster 6  | 14       | 0           | 19          | 111         | 969         |
| Cluster 7  | 22       | 2           | 17          | 29          | 254         |
| Cluster 8  | 74       | 0           | 2           | 4           | 44          |
| Cluster 9  | 25       | 0           | 0           | 0           | 8           |
| Cluster 10 | 417      | 17          | 10          | 6           | 1           |
| Total      | 736      | 24          | 301         | 684         | 3653        |



**Table S3.** Quantity of ceramics sherds dated with confidence by period for each cluster from Burmese, Thai, Vietnamese, and Japanese production centers.

| Period     | Total Count Burma |             |             |             |             | Total Count Thailand |             |             |             |             | Total Count Vietnam |             |             |             |             | Total Count Japan |             |             |             |             |
|------------|-------------------|-------------|-------------|-------------|-------------|----------------------|-------------|-------------|-------------|-------------|---------------------|-------------|-------------|-------------|-------------|-------------------|-------------|-------------|-------------|-------------|
|            | Pre 1400          | 1400 – 1450 | 1450 - 1550 | 1550 - 1650 | 1650 – 1800 | Pre 1400             | 1400 – 1450 | 1450 - 1550 | 1550 - 1650 | 1650 – 1800 | Pre 1400            | 1400 – 1450 | 1450 - 1550 | 1550 - 1650 | 1650 – 1800 | Pre 1400          | 1400 – 1450 | 1450 - 1550 | 1550 - 1650 | 1650 – 1800 |
| Cluster 1  | 0                 | 0           | 31          | 108         | 0           | 0                    | 0           | 1           | 2           | 0           | 0                   | 0           | 0           | 0           | 0           | 0                 | 0           | 0           | 2           | 62          |
| Cluster 2  | 0                 | 1           | 157         | 82          | 4           | 0                    | 1           | 38          | 0           | 0           | 0                   | 0           | 0           | 13          | 0           | 0                 | 0           | 0           | 2           | 17          |
| Cluster 3  | 0                 | 0           | 61          | 68          | 8           | 0                    | 0           | 5           | 0           | 0           | 0                   | 0           | 0           | 38          | 0           | 0                 | 0           | 0           | 2           | 18          |
| Cluster 4  | 0                 | 0           | 0           | 1           | 350         | 0                    | 0           | 46          | 0           | 0           | 0                   | 0           | 8           | 0           | 47          | 0                 | 0           | 0           | 0           | 33          |
| Cluster 5  | 0                 | 0           | 0           | 0           | 4           | 1                    | 0           | 4           | 0           | 0           | 0                   | 0           | 0           | 0           | 0           | 0                 | 0           | 0           | 0           | 57          |
| Cluster 6  | 0                 | 0           | 17          | 66          | 31          | 0                    | 0           | 9           | 0           | 0           | 0                   | 0           | 0           | 202         | 0           | 0                 | 0           | 0           | 1           | 33          |
| Cluster 7  | 0                 | 0           | 1           | 13          | 309         | 0                    | 0           | 1           | 0           | 0           | 0                   | 0           | 1           | 130         | 0           | 0                 | 0           | 0           | 0           | 31          |
| Cluster 8  | 0                 | 0           | 19          | 0           | 0           | 0                    | 0           | 19          | 0           | 0           | 0                   | 0           | 1           | 0           | 0           | 0                 | 0           | 0           | 0           | 8           |
| Cluster 9  | 0                 | 0           | 2           | 0           | 0           | 1                    | 0           | 0           | 0           | 0           | 0                   | 0           | 0           | 4           | 0           | 0                 | 0           | 0           | 0           | 2           |
| Cluster 10 | 4                 | 10          | 72          | 0           | 0           | 4                    | 18          | 127         | 0           | 0           | 9                   | 7           | 0           | 0           | 0           | 0                 | 0           | 0           | 0           | 0           |
| Total      | 4                 | 11          | 360         | 338         | 706         | 6                    | 19          | 250         | 2           | 0           | 9                   | 7           | 10          | 434         | 0           | 0                 | 0           | 0           | 7           | 20          |

**Table S4.** Counts of gravestones from the survey by time period. The post-mid 16<sup>th</sup> century graves are mostly types known to be associated with the Aceh sultanate.

| <b>Period (C.E.)</b>                                  | <b>Count</b> |
|-------------------------------------------------------|--------------|
| 15 <sup>th</sup> Century                              | 152          |
| Late 15 <sup>th</sup> to Mid 16 <sup>th</sup> Century | 116          |
| Post Mid 16 <sup>th</sup> Century                     | 1598         |
| Undated                                               | 3997         |
| Total                                                 | 5863         |

**Table S5.** Reference set of dated gravestones from the region.

| Example                                                                                                                                                                        | Dates          | References                          |
|--------------------------------------------------------------------------------------------------------------------------------------------------------------------------------|----------------|-------------------------------------|
| <b>15<sup>th</sup> Century Gravestone Types</b>                                                                                                                                |                |                                     |
|  <p data-bbox="248 1066 532 1087"><i>KK 21 : Stèle I face A (De Vink, 1911)</i></p>          | 1415           | Kuta Kareung Cemetery Tomb KK21 (1) |
|  <p data-bbox="248 1724 597 1745"><i>TK I/05 : Stèle II face A (Guillot/Kalus 2002)</i></p> | 1483 -<br>1484 | Tomb TK I 05 (1)                    |
|                                                                                                                                                                                |                |                                     |

|                                                                                     |                |                                                 |
|-------------------------------------------------------------------------------------|----------------|-------------------------------------------------|
|                                                                                     |                |                                                 |
|   | 1406 -<br>1407 | AB Lamreh Kota Lubhok Cemetery Tomb<br>KL01 (1) |
|                                                                                     | 1421           | AB Lamreh Kota Lubhok Cemetery Tomb<br>KL03 (1) |
|                                                                                     | 1437           | AB Lamreh Kota Lubhok Cemetery Tomb<br>KL04 (1) |
|                                                                                     | 1441           | Tomb TK II 17 (1)                               |
|                                                                                     | 1441           | AB Lamreh Kota Lubhok Cemetery Tomb<br>KL02 (1) |
|                                                                                     | 1446           | Tomb TK I 03 (1)                                |
|                                                                                     | 1457 -<br>1458 | Ab Glee Jong Cemetery Tomb GJ04 (1)             |
|                                                                                     | 1458           | Tomb TK I 07 (1)                                |
|                                                                                     | 1460           | Tomb YK I 04 (1)                                |
|                                                                                     | 1461           | Tomb TK I 19 (1)                                |
|                                                                                     | 1471           | Ab Glee Jong Cemetery Tomb GJ01 (1)             |
|                                                                                     |                |                                                 |
|  | 1430           | Peuet Ploh Peuet Grave X (5)                    |
|                                                                                     | 1435           | Peut Pleug Peut Cemetery (1)                    |
|                                                                                     | 1436           | Tungku Sareh Cemetery Tomb TSA 19 (1)           |
|                                                                                     | 1437           | Teungku Sareh Grave XIX (5)                     |
|                                                                                     | 1437<br>- 1438 | Teungku Sidi Grave VII (5)                      |
|                                                                                     | 1438           | Kuta Kareung Cemetery Tomb KK20 (1)             |
|                                                                                     | 1440           | Tungku Sareh Cemetery Tomb TSA 18 (1)           |
|                                                                                     |                |                                                 |

KL 02 : Face A (Guillot/Kalus 2006)

### Late 15<sup>th</sup> – Early 16<sup>th</sup> Century Gravestone Types

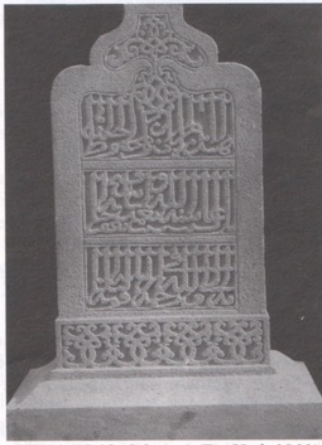

*TB 09 : Stèle I face A (De Vink 1911)*

|                      |                                           |
|----------------------|-------------------------------------------|
| 1431                 | Tungku di Bale Cemetery Tomb TB41 (1)     |
| 1467 -<br>1468       | Tungku di Bale Cemetery Tomb TB10 (1)     |
| 1468                 | Tungku di Bale Cemetery Tomb TB58 (1)     |
| 1472                 | Kuta Kareung Cemetery Tomb KK16 (1)       |
| 1473 -<br>1474       | Kuta Kareung Cemetery Tomb KK01 (1)       |
| 1475                 | Tungku di Bale Cemetery Tomb TB03 (1)     |
| 1475                 | Tungku di Bale Cemetery Tomb TB38 (1)     |
| 1476                 | Tungku di Bale Cemetery Tomb TB43 (1)     |
| 1477                 | Tungku di Bale Cemetery Tomb TB46 (1)     |
| 1480                 | Tungku di Bale Cemetery Tomb TB62 (1)     |
| 1484                 | Tungku di Bale Cemetery Tomb TB47 (1)     |
| 1485                 | Tungku di Bale Cemetery Tomb TB07 (1)     |
| 1485<br>(or<br>1466) | Tungku di Bale Cemetery Tomb TB39 (1)     |
| 1489<br>(or<br>1470) | Tungku di Bale Cemetery Tomb TB35 (1)     |
| 1490                 | Tungku di Bale Cemetery Tomb TB02 (1)     |
| 1490                 | Tungku di Bale Cemetery Tomb TB48 (1)     |
| 1492                 | Tungku di Bale Cemetery Tomb TB08 (1)     |
| 1492                 | Tungku di Bale Cemetery Tomb TB34 (1)     |
| 1494 -<br>1495       | Tungku di Bale Cemetery Tomb TB36 (1)     |
| 1495                 | Tungku di Bale Cemetery Tomb TB33 (1)     |
| 1495                 | Tungku di Bale Cemetery Tomb TB37 (1)     |
| 1499                 | Peut Pleug Peut Cemetery Tomb PP01bis (1) |
| 1500                 | Tungku Sareh Cemetery Tomb TSA07 (1)      |
| 1502                 | Peut Pleug Peut Cemetery Tomb PP01 (1)    |
| 1506                 | Tomb TM02 (1)                             |
| 1507                 | Tungku di Bale Cemetery Tomb TB09 (1)     |
| 1508                 | Tungku Sareh Cemetery Tomb TSA10 (1)      |
| 1509                 | Tungku di Bale Cemetery Tomb TB14 (1)     |
| 1509                 | Tungku di Bale Cemetery Tomb TB15 (1)     |
| 1510                 | Tomb TM03 (1)                             |
| 1510                 | Tungku Sareh Cemetery Tomb TSA22 (1)      |
| 1511                 | Tungku di Bale Cemetery Tomb TB28 (1)     |
| 1513                 | Tungku di Bale Cemetery Tomb TB21 (1)     |
| 1513                 | Tungku di Bale Cemetery Tomb TB22 (1)     |
| 1514                 | Tungku di Bale Cemetery Tomb TB19 (1)     |

|  |                      |                                       |
|--|----------------------|---------------------------------------|
|  | 1514                 | Tungku di Bale Cemetery Tomb TB01 (1) |
|  | 1514                 | Tungku Sareh Cemetery Tomb TSA11 (1)  |
|  | 1517                 | Tungku di Bale Cemetery Tomb TB16 (1) |
|  | 1517                 | Tungku di Bale Cemetery Tomb TB17 (1) |
|  | 1517                 | Tungku di Bale Cemetery Tomb TB51 (1) |
|  | 1517                 | Tungku Sareh Cemetery Tomb TSA13 (1)  |
|  | 1519<br>(or<br>1509) | Tungku di Bale Cemetery Tomb TB23 (1) |
|  | 1519                 | Tungku di Bale Cemetery Tomb TB50 (1) |

### Mid 16<sup>th</sup> Century – 18<sup>th</sup> Century Gravestone Types

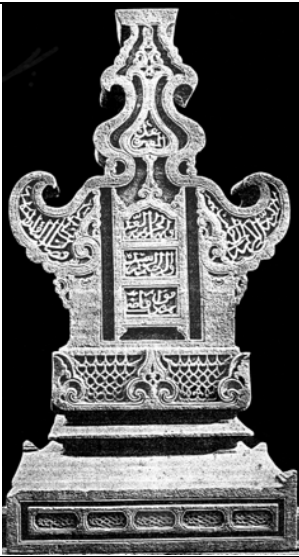

|  |                |                                           |
|--|----------------|-------------------------------------------|
|  | 1549           | Blang Tutung Cemetery Tomb 4 (3)          |
|  | 1563           | Meuseudjit Raya-Raya Cemetery Tomb 2 (4)  |
|  | 1565           | Yub Hagu Cemetery (4)                     |
|  | 1573 -<br>1582 | Tuan di Kadang Cemetery Tomb 35 (2)       |
|  | 1578           | Tuan Meurah Cemetery Tomb 1 (3)           |
|  | 1579           | Kandang Kampung Punge Cemetery Tomb 1 (4) |
|  | 1589           | Kandang Said Cemetery Tomb 3 (4)          |
|  | 1591           | Tuan di Kandang Cemetery Tomb 5 (4)       |

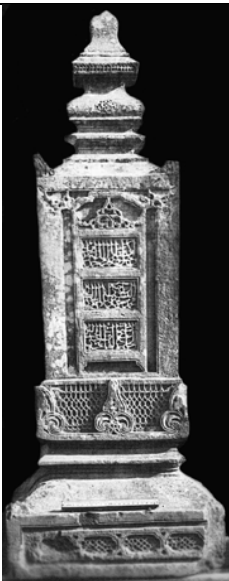

|  |                |                                         |
|--|----------------|-----------------------------------------|
|  | 1579           | Cot Ba Beum Cemetery Tomb 2 (3)         |
|  | 1580 -<br>1581 | Tuan di Guri Cemetery Tomb 5 (4)        |
|  | 1585           | Tungku Ba Asan Cemetery Tomb 14 (3)     |
|  | 1586 -<br>1587 | Jarat Raya Cemetery Tomb 8 (3)          |
|  | 1589           | Tuan di Kandang Cemetery Tomb 34 (2)    |
|  | 1591           | Tungku Lam Raya Cemetery Tomb 1 (4)     |
|  | 1591           | Tuan di Kandang Cemetery III Tomb 6 (2) |
|  | 1594           | Tuan Meurah Cemetery Tomb 2 (3)         |

|                                                                                   |             |                                        |
|-----------------------------------------------------------------------------------|-------------|----------------------------------------|
| 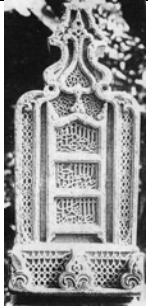 | 1573 - 1574 | Jarat Ba Lume Cemetery Tomb 1 (4)      |
|                                                                                   | 1574        | Jarat Ba Lume Cemetery Tomb 13 (4)     |
|                                                                                   | 1585        | Jarat Ba Lume Cemetery Tomb 6 (4)      |
|                                                                                   | 1585        | Jarat Ba Lume Cemetery Tomb 22 (4)     |
|  | 1584        | Tungku Syeh Aircam Cemetery Tomb 1 (4) |
|                                                                                   | 1587        | Tungku Glompang Cemetery Tomb 1 (3)    |

**Dataset S1 (separate file)**

Ceramic counts by Cluster and time period used to produce the GIS distribution maps used in this paper.



## References

1. Guillot, C. & Kalus, L. (2008). *Les monuments funéraires et l'histoire du Sultanat du Pasai*. Paris: Cahiers d'Archipel.
2. Kalus, L. & Guillot, G. 2014. Cimetière de Tuan di Kandang, *Archipel* 88: 71-147.
3. Kalus, L. & Guillot, G. 2016. Cimetières de Sumatra, Varia. I [Épigraphie islamique d'Aceh. 10]. *Archipel* 91 : 55-103.
4. Kalus, L. & Guillot, G. 2017. Cimetières de Sumatra, Varia. II [Épigraphie islamique d'Aceh. 11] *Archipel* 93 : 31-84.
5. Lambourn, E. 2004. The formation of the batu Aceh tradition in fifteenth-century Samudera-Pasai. *Indonesia and the Malay World*, 32: 211-248.
6. Perret, D., Razak, K. & Kalus, L. 1999. *Batu Aceh: Warisan sejarah Johor*. Johor Bahru: Yayasan Warisan Johor/École Française d'Extrême-Orient.
7. Perret, D., Razak, K. & Kalus, L. 2004. *Batu Aceh Johor Dalam Perbandingan*. Johor Bahru: Yayasan Warisan Johor/ École Française d'Extrême-Orient.
8. Haslett, J., & Parnell, A. C. (2008). A simple monotone process with application to radiocarbon-dated depth chronologies. *Journal of the Royal Statistical Society: Series C (Applied Statistics)*, 57(4), 399–418. <https://doi.org/10.1111/j.1467-9876.2008.00623.x>
9. Parnell, A. C., Haslett, J., Allen, J. R. M., Buck, C. E., & Huntley, B. (2008). A flexible approach to assessing synchronicity of past events using Bayesian reconstructions of sedimentation history. *Quaternary Science Reviews*, 27(19–20), 1872–1885. <https://doi.org/10.1016/j.quascirev.2008.07.009>
10. Fraley, C., & Raftery, A. E. (2002). Model-based clustering, discriminant analysis, and density estimation. *Journal of the American Statistical Association*, 97(458), 611–631. <https://doi.org/10.1198/016214502760047131>
11. Scrucca L., Fop M., Murphy T. B. and Raftery A. E. (2017) mclust 5: clustering, classification and density estimation using Gaussian finite mixture models. *The R Journal* 8/1, pp 205-233
12. Bronk Ramsey, C. (1995). Radiocarbon calibration and analysis of stratigraphy: The OxCal program. *Radiocarbon*, 37(2), 425 – 430.
13. Meltzner, A. J. *et al.* (2010). Coral evidence for earthquake recurrence and an A.D. 1390-1455 cluster at the south end of the 2004 Aceh-Andaman rupture. *Journal of Geophysical Research-Solid Earth* **115**, doi:B10402 10.1029/2010jb007499
14. Sieh, K. *et al.* (2015). Penultimate predecessors of the 2004 Indian Ocean tsunami in Aceh, Sumatra: Stratigraphic, archaeological, and historical evidence. *Journal of Geophysical Research-Solid Earth* 120, 308 – 325; doi:10.1002/2014jb011538
