# Supplementary material for: Archaeological evidence that a late 14th-century tsunami devastated the coast of northern Sumatra and redirected history
Source: PubMed Central journal article supplement (PMC6587673; doi:10.1073/pnas.1902241116), 2019-05-28
Supplement: pnas.1902241116.sd01.pdf [file pnas.1902241116.sd01.pdf]

### CLUSTER 1 TRADE CERAMICS

| Country | Region    | Sub-Region | Basin | Bowl | Dish | Jar | Lid | Washer |
|---------|-----------|------------|-------|------|------|-----|-----|--------|
| China   | Fujian    | Cizao      |       |      |      | 7   |     |        |
| China   | Fujian    | Tongan     |       | 49   |      |     |     |        |
| China   | Fujian    | Tongan     |       |      | 5    |     |     |        |
| China   | Guangdong |            | 10    |      |      |     |     |        |
| China   | Guangdong |            |       |      |      | 123 |     |        |
| China   | Guangdong |            |       |      |      |     | 2   |        |
| China   | Zhejiang  | Longquan   |       | 30   |      |     |     |        |
| China   | Zhejiang  | Longquan   |       |      | 27   |     |     |        |
| China   | Zhejiang  | Longquan   |       |      |      |     |     | 3      |

**Cluster 1 Pre-1400 All.** We recovered 256 sherds from Cluster 1 that date prior to 1400. There are no overlapping sherds for this period.

| Country | Region   | Sub-Region | Bowl | Dish |
|---------|----------|------------|------|------|
| China   | Zhejiang | Longquan   | 1    |      |
| China   | Zhejiang | Longquan   |      | 1    |

**Cluster 1 1400 – 1450 Definite.** We recovered 2 sherds that were produced between 1400 and 1450.

| Country | Region | Sub-Region | Basin | Bowl | Covered Box | Dish | Jar | Kendi | Lid |
|---------|--------|------------|-------|------|-------------|------|-----|-------|-----|
| Burma   | Mon    | Martaban   | 1     |      |             |      |     |       |     |
| Burma   | Mon    | Martaban   |       | 3    |             |      |     |       |     |
| Burma   | Mon    | Martaban   |       |      |             | 31   |     |       |     |
| Burma   | Mon    | Martaban   |       |      |             |      | 22  |       |     |

|          |           |             |  |   |   |    |   |   |
|----------|-----------|-------------|--|---|---|----|---|---|
| China    | Zhejiang  | Longquan    |  | 1 |   |    |   |   |
| China    | Zhejiang  | Longquan    |  |   |   | 1  |   |   |
| Thailand | Sukhothai | Sawankhalok |  | 2 |   |    |   |   |
| Thailand | Sukhothai | Sawankhalok |  |   |   | 26 |   |   |
| Thailand | Sukhothai | Sukhothai   |  |   | 1 |    |   |   |
| Thailand | Sukhothai | Sukhothai   |  |   |   | 2  |   |   |
| Thailand | Sukhothai | Sukhothai   |  |   |   |    |   | 2 |
| Thailand |           |             |  |   |   | 1  |   |   |
| Vietnam  | Hai Duong |             |  |   |   | 1  |   |   |
| Vietnam  | Hai Duong |             |  |   |   |    | 1 |   |

**Cluster 1 1400 – 1450 Possible.** We recovered 95 sherds that might have been produced between 1400 and 1450.

| Country  | Region    | Sub-Region  | Bowl | Covered Box | Dish | Jar | Jarlet | Unknown |
|----------|-----------|-------------|------|-------------|------|-----|--------|---------|
| Burma    | Mon       | Martaban    | 12   |             |      |     |        |         |
| Burma    | Mon       | Martaban    |      |             | 15   |     |        |         |
| Burma    | Mon       | Martaban    |      |             |      | 4   |        |         |
| China    | Guangdong |             |      |             |      | 1   |        |         |
| China    | Jiangxi   | Jingdezhen  | 10   |             |      |     |        |         |
| China    | Jiangxi   | Jingdezhen  |      |             | 38   |     |        |         |
| China    | Jiangxi   | Jingdezhen  |      |             |      | 1   |        |         |
| China    | Jiangxi   | Jingdezhen  |      |             |      |     | 1      |         |
| China    | Jiangxi   | Jingdezhen  |      |             |      |     |        | 1       |
| Thailand | Sukhothai | Sawankhalok |      | 1           |      |     |        |         |

**Cluster 1 1450 – 1550 Definite.** We recovered 84 sherds that were produced between 1450 and 1550.

| Country  | Region    | Sub-Region  | Basin | Bowl | Covered Box | Dish | Jar | Jarlet | Kendi | Lid | Unknown |
|----------|-----------|-------------|-------|------|-------------|------|-----|--------|-------|-----|---------|
| Burma    | Mon       | Martaban    | 1     |      |             |      |     |        |       |     |         |
| Burma    | Mon       | Martaban    |       | 20   |             |      |     |        |       |     |         |
| Burma    | Mon       | Martaban    |       |      |             | 76   |     |        |       |     |         |
| Burma    | Mon       | Martaban    |       |      |             |      | 31  |        |       |     |         |
| China    | Guangdong |             |       |      |             |      | 1   |        |       |     |         |
| China    | Jiangxi   | Jingdezhen  |       | 10   |             |      |     |        |       |     |         |
| China    | Jiangxi   | Jingdezhen  |       |      |             | 38   |     |        |       |     |         |
| China    | Jiangxi   | Jingdezhen  |       |      |             |      | 1   |        |       |     |         |
| China    | Jiangxi   | Jingdezhen  |       |      |             |      |     | 1      |       |     |         |
| China    | Jiangxi   | Jingdezhen  |       |      |             |      |     |        |       |     | 1       |
| Thailand | Sukhothai | Sawankhalok |       | 2    |             |      |     |        |       |     |         |
| Thailand | Sukhothai | Sawankhalok |       |      | 1           |      |     |        |       |     |         |
| Thailand | Sukhothai | Sawankhalok |       |      |             | 30   |     |        |       |     |         |
| Thailand | Sukhothai | Sawankhalok |       |      |             |      | 3   |        |       |     |         |
| Thailand | Sukhothai | Sukhothai   |       |      | 1           |      |     |        |       |     |         |
| Thailand | Sukhothai | Sukhothai   |       |      |             | 2    |     |        |       |     |         |
| Thailand | Sukhothai | Sukhothai   |       |      |             |      |     |        |       | 2   |         |
| Thailand |           |             |       |      |             | 1    |     |        |       |     |         |
| Vietnam  | Hai Duong |             |       |      |             | 1    |     |        |       |     |         |
| Vietnam  | Hai Duong |             |       |      |             |      |     |        | 1     |     |         |

**Cluster 1 1450 – 1550 Possible.** We recovered 224 sherds that might have been produced between 1450 and 1550.

| Country | Region    | Sub-Region | Bowl | Covered Box | Cup | Dish | Jar | Jarlet | Lid | Potiche | Stem Cup | Unknown |
|---------|-----------|------------|------|-------------|-----|------|-----|--------|-----|---------|----------|---------|
| Burma   | Mon       | Martaban   | 7    |             |     |      |     |        |     |         |          |         |
| Burma   | Mon       | Martaban   |      |             |     | 19   |     |        |     |         |          |         |
| Burma   | Mon       | Martaban   |      |             |     |      | 80  |        |     |         |          |         |
| Burma   | Mon       | Martaban   |      |             |     |      |     |        | 1   |         |          |         |
| Burma   | Mon       | Martaban   |      |             |     |      |     |        |     |         |          | 1       |
| China   | Fujian    | Dehua      | 2    |             |     |      |     |        |     |         |          |         |
| China   | Fujian    | Dehua      |      |             |     |      |     |        |     | 1       |          |         |
| China   | Fujian    | Zhangzhou  | 214  |             |     |      |     |        |     |         |          |         |
| China   | Fujian    | Zhangzhou  |      | 2           |     |      |     |        |     |         |          |         |
| China   | Fujian    | Zhangzhou  |      |             |     | 1014 |     |        |     |         |          |         |
| China   | Fujian    | Zhangzhou  |      |             |     |      |     |        | 3   |         |          |         |
| China   | Fujian    | Zhangzhou  |      |             |     |      |     |        |     | 8       |          |         |
| China   | Fujian    | Zhangzhou  |      |             |     |      |     |        |     |         |          | 1       |
| China   | Guangdong |            |      |             |     |      | 2   |        |     |         |          |         |
| China   | Jiangxi   | Jingdezhen | 140  |             |     |      |     |        |     |         |          |         |
| China   | Jiangxi   | Jingdezhen |      | 8           |     |      |     |        |     |         |          |         |
| China   | Jiangxi   | Jingdezhen |      |             | 5   |      |     |        |     |         |          |         |
| China   | Jiangxi   | Jingdezhen |      |             |     | 81   |     |        |     |         |          |         |
| China   | Jiangxi   | Jingdezhen |      |             |     |      | 1   |        |     |         |          |         |
| China   | Jiangxi   | Jingdezhen |      |             |     |      |     | 1      |     |         |          |         |
| China   | Jiangxi   | Jingdezhen |      |             |     |      |     |        |     | 8       |          |         |
| China   | Jiangxi   | Jingdezhen |      |             |     |      |     |        |     |         | 2        |         |
| China   | Jiangxi   | Jingdezhen |      |             |     |      |     |        |     |         |          | 1       |
| Japan   | Hizen     |            |      |             |     | 2    |     |        |     |         |          |         |

|          |           |             |  |  |  |  |   |  |  |  |  |  |
|----------|-----------|-------------|--|--|--|--|---|--|--|--|--|--|
| Thailand | Sukhothai | Sawankhalok |  |  |  |  | 2 |  |  |  |  |  |
|----------|-----------|-------------|--|--|--|--|---|--|--|--|--|--|

**Cluster 1 1550 – 1650 Definite.** We recovered 1,607 sherds that were produced between 1550 and 1650.

| Country | Region    | Sub-Region | Bowl | Covered Box | Cup | Dish | Jar | Jarlet | Lid | Potiche | Stem Cup | Unknown |
|---------|-----------|------------|------|-------------|-----|------|-----|--------|-----|---------|----------|---------|
| Burma   | Mon       | Martaban   | 29   |             |     |      |     |        |     |         |          |         |
| Burma   | Mon       | Martaban   |      |             |     | 127  |     |        |     |         |          |         |
| Burma   | Mon       | Martaban   |      |             |     |      | 225 |        |     |         |          |         |
| Burma   | Mon       | Martaban   |      |             |     |      |     |        | 1   |         |          |         |
| Burma   | Mon       | Martaban   |      |             |     |      |     |        |     |         |          | 1       |
| China   | Fujian    | Dehua      | 4    |             |     |      |     |        |     |         |          |         |
| China   | Fujian    | Dehua      |      | 8           |     |      |     |        |     |         |          |         |
| China   | Fujian    | Dehua      |      |             | 1   |      |     |        |     |         |          |         |
| China   | Fujian    | Dehua      |      |             |     | 1    |     |        |     |         |          |         |
| China   | Fujian    | Dehua      |      |             |     |      |     |        | 20  |         |          |         |
| China   | Fujian    | Dehua      |      |             |     |      |     |        |     | 29      |          |         |
| China   | Fujian    | Zhangzhou  | 256  |             |     |      |     |        |     |         |          |         |
| China   | Fujian    | Zhangzhou  |      | 2           |     |      |     |        |     |         |          |         |
| China   | Fujian    | Zhangzhou  |      |             |     | 1025 |     |        |     |         |          |         |
| China   | Fujian    | Zhangzhou  |      |             |     |      |     |        | 5   |         |          |         |
| China   | Fujian    | Zhangzhou  |      |             |     |      |     |        |     | 9       |          |         |
| China   | Fujian    | Zhangzhou  |      |             |     |      |     |        |     |         |          | 1       |
| China   | Guangdong |            |      |             |     |      | 2   |        |     |         |          |         |
| China   | Jiangxi   | Jingdezhen | 143  |             |     |      |     |        |     |         |          |         |
| China   | Jiangxi   | Jingdezhen |      | 8           |     |      |     |        |     |         |          |         |
| China   | Jiangxi   | Jingdezhen |      |             | 5   |      |     |        |     |         |          |         |

|          |           |             |  |  |   |    |   |   |   |   |   |   |
|----------|-----------|-------------|--|--|---|----|---|---|---|---|---|---|
| China    | Jiangxi   | Jingdezhen  |  |  |   | 85 |   |   |   |   |   |   |
| China    | Jiangxi   | Jingdezhen  |  |  |   |    | 1 |   |   |   |   |   |
| China    | Jiangxi   | Jingdezhen  |  |  |   |    |   | 1 |   |   |   |   |
| China    | Jiangxi   | Jingdezhen  |  |  |   |    |   |   | 7 |   |   |   |
| China    | Jiangxi   | Jingdezhen  |  |  |   |    |   |   |   | 9 |   |   |
| China    | Jiangxi   | Jingdezhen  |  |  |   |    |   |   |   |   | 2 |   |
| China    | Jiangxi   | Jingdezhen  |  |  |   |    |   |   |   |   |   | 1 |
| Japan    | Hizen     |             |  |  |   | 2  |   |   |   |   |   |   |
| Thailand | Sukhothai | Sawankhalok |  |  | 4 |    |   |   |   |   |   |   |
| Thailand | Sukhothai | Sawankhalok |  |  |   | 5  |   |   |   |   |   |   |

**Cluster 1 1550 – 1650 Possible.** We recovered 2,019 sherds that might have been produced between 1550 and 1650.

| Country | Region | Sub-Region | Bowl | Covered Box | Cup | Dish | Jar | Kendi | Lid | Potiche | Vase | Unknown |
|---------|--------|------------|------|-------------|-----|------|-----|-------|-----|---------|------|---------|
| China   | Fujian | Anxi       | 3    |             |     |      |     |       |     |         |      |         |
| China   | Fujian | Dehua      | 138  |             |     |      |     |       |     |         |      |         |
| China   | Fujian | Dehua      |      |             |     | 25   |     |       |     |         |      |         |
| China   | Fujian | Dehua      |      |             |     |      |     |       | 1   |         |      |         |
| China   | Fujian | Dehua      |      |             |     |      |     |       |     | 2       |      |         |
| China   | Fujian | Zhangzhou  | 1341 |             |     |      |     |       |     |         |      |         |
| China   | Fujian | Zhangzhou  |      | 1           |     |      |     |       |     |         |      |         |
| China   | Fujian | Zhangzhou  |      |             | 1   |      |     |       |     |         |      |         |
| China   | Fujian | Zhangzhou  |      |             |     | 151  |     |       |     |         |      |         |
| China   | Fujian | Zhangzhou  |      |             |     |      | 8   |       |     |         |      |         |
| China   | Fujian | Zhangzhou  |      |             |     |      |     |       | 10  |         |      |         |
| China   | Fujian | Zhangzhou  |      |             |     |      |     |       |     | 25      |      |         |
| China   | Fujian | Zhangzhou  |      |             |     |      |     |       |     |         | 1    |         |

|       |         |            |     |   |     |    |   |   |    |    |  |   |   |
|-------|---------|------------|-----|---|-----|----|---|---|----|----|--|---|---|
| China | Fujian  | Zhangzhou  |     |   |     |    |   |   |    |    |  |   | 1 |
| China | Fujian  |            | 164 |   |     |    |   |   |    |    |  |   |   |
| China | Fujian  |            |     |   | 4   |    |   |   |    |    |  |   |   |
| China | Jiangxi | Jingdezhen | 84  |   |     |    |   |   |    |    |  |   |   |
| China | Jiangxi | Jingdezhen |     | 2 |     |    |   |   |    |    |  |   |   |
| China | Jiangxi | Jingdezhen |     |   | 5   |    |   |   |    |    |  |   |   |
| China | Jiangxi | Jingdezhen |     |   |     | 30 |   |   |    |    |  |   |   |
| China | Jiangxi | Jingdezhen |     |   |     |    |   | 1 |    |    |  |   |   |
| China | Jiangxi | Jingdezhen |     |   |     |    | 1 |   |    |    |  |   |   |
| China | Jiangxi | Jingdezhen |     |   |     |    |   |   | 27 |    |  |   |   |
| China | Jiangxi | Jingdezhen |     |   |     |    |   |   |    | 86 |  |   |   |
| China | Jiangxi | Jingdezhen |     |   |     |    |   |   |    |    |  | 1 |   |
| Japan | Hizen   |            | 52  |   |     |    |   |   |    |    |  |   |   |
| Japan | Hizen   |            |     |   | 546 |    |   |   |    |    |  |   |   |
| Japan | Hizen   |            |     |   |     |    |   |   | 4  |    |  |   |   |
| Japan | Hizen   |            |     |   |     |    |   |   |    | 22 |  |   |   |

**Cluster 1 1650 – 1800 Definite.** We recovered 2,737 sherds that were produced between 1650 and 1800.

| Country | Region | Sub-Region | Bowl | Covered Box | Cup | Dish | Jar | Kendi | Lid | Potiche | Tea Pot | Vase | Unknown |
|---------|--------|------------|------|-------------|-----|------|-----|-------|-----|---------|---------|------|---------|
| Burma   | Mon    | Martaban   | 17   |             |     |      |     |       |     |         |         |      |         |
| Burma   | Mon    | Martaban   |      |             |     | 78   |     |       |     |         |         |      |         |
| Burma   | Mon    | Martaban   |      |             |     |      | 140 |       |     |         |         |      |         |
| Burma   | Mon    | Martaban   |      |             |     |      |     |       |     |         |         |      |         |
| China   | Fujian | Anxi       | 8    |             |     |      |     |       |     |         |         |      |         |
| China   | Fujian | Dehua      | 179  |             |     |      |     |       |     |         |         |      |         |

|       |         |            |      |    |   |     |   |   |    |    |   |   |   |
|-------|---------|------------|------|----|---|-----|---|---|----|----|---|---|---|
| China | Fujian  | Dehua      |      | 10 |   |     |   |   |    |    |   |   |   |
| China | Fujian  | Dehua      |      |    | 1 |     |   |   |    |    |   |   |   |
| China | Fujian  | Dehua      |      |    |   | 59  |   |   |    |    |   |   |   |
| China | Fujian  | Dehua      |      |    |   |     |   |   | 21 |    |   |   |   |
| China | Fujian  | Dehua      |      |    |   |     |   |   |    | 30 |   |   |   |
| China | Fujian  | Zhangzhou  | 1975 |    |   |     |   |   |    |    |   |   |   |
| China | Fujian  | Zhangzhou  |      | 1  |   |     |   |   |    |    |   |   |   |
| China | Fujian  | Zhangzhou  |      |    | 1 |     |   |   |    |    |   |   |   |
| China | Fujian  | Zhangzhou  |      |    |   | 237 |   |   |    |    |   |   |   |
| China | Fujian  | Zhangzhou  |      |    |   |     | 8 |   |    |    |   |   |   |
| China | Fujian  | Zhangzhou  |      |    |   |     |   |   | 14 |    |   |   |   |
| China | Fujian  | Zhangzhou  |      |    |   |     |   |   |    | 28 |   |   |   |
| China | Fujian  | Zhangzhou  |      |    |   |     |   |   |    |    |   | 1 |   |
| China | Fujian  | Zhangzhou  |      |    |   |     |   |   |    |    |   |   | 1 |
| China | Fujian  |            | 164  |    |   |     |   |   |    |    |   |   |   |
| China | Fujian  |            |      |    |   | 5   |   |   |    |    |   |   |   |
| China | Jiangsu | Yixing     |      |    |   |     |   |   |    |    | 5 |   |   |
| China | Jiangxi | Jingdezhen | 88   |    |   |     |   |   |    |    |   |   |   |
| China | Jiangxi | Jingdezhen |      | 2  |   |     |   |   |    |    |   |   |   |
| China | Jiangxi | Jingdezhen |      |    | 5 |     |   |   |    |    |   |   |   |
| China | Jiangxi | Jingdezhen |      |    |   | 34  |   |   |    |    |   |   |   |
| China | Jiangxi | Jingdezhen |      |    |   |     |   | 1 |    |    |   |   |   |
| China | Jiangxi | Jingdezhen |      |    |   |     | 1 |   |    |    |   |   |   |
| China | Jiangxi | Jingdezhen |      |    |   |     |   |   | 27 |    |   |   |   |
| China | Jiangxi | Jingdezhen |      |    |   |     |   |   |    | 87 |   |   |   |
| China | Jiangxi | Jingdezhen |      |    |   |     |   |   |    |    |   |   | 1 |



|             |         |            |    |  |  |     |  |   |    |  |  |  |
|-------------|---------|------------|----|--|--|-----|--|---|----|--|--|--|
| Japan       | Hizen   |            | 52 |  |  |     |  |   |    |  |  |  |
| Japan       | Hizen   |            |    |  |  | 546 |  |   |    |  |  |  |
| Japan       | Hizen   |            |    |  |  |     |  | 4 |    |  |  |  |
| Japan       | Hizen   |            |    |  |  |     |  |   | 22 |  |  |  |
| Netherlands | Limburg | Maastricht | 1  |  |  |     |  |   |    |  |  |  |
| Netherlands | Limburg | Maastricht |    |  |  | 13  |  |   |    |  |  |  |

**Cluster 1 1650 – 1800 Possible.** We recovered 3,867 sherds that might have been produced between 1650 and 1800.

## CLUSTER 2 TRADE CERAMICS

| Country | Region      | Sub-Region | Basin | Bowl | Dish | Jar | Jarlet | Kendi | Washer | Unknown |
|---------|-------------|------------|-------|------|------|-----|--------|-------|--------|---------|
| China   | Fujian      | Cizao      |       |      |      | 2   |        |       |        |         |
| China   | Fujian      | Dehua      |       | 1    |      |     |        |       |        |         |
| China   | Fujian      | Tongan     |       | 22   |      |     |        |       |        |         |
| China   | Fujian      |            |       | 29   |      |     |        |       |        |         |
| China   | Fujian      |            |       |      |      |     | 1      |       |        |         |
| China   | Fujian      |            |       |      |      |     |        | 1     |        |         |
| China   | Guangdong   | Guangzhou  | 3     |      |      |     |        |       |        |         |
| China   | Guangdong   | Guangzhou  |       |      |      | 3   |        |       |        |         |
| China   | Guangdong   | Guangzhou  |       |      |      |     |        |       |        | 1       |
| China   | Guangdong   |            | 1     |      |      |     |        |       |        |         |
| China   | Guangdong   |            |       | 1    |      |     |        |       |        |         |
| China   | Guangdong   |            |       |      |      | 35  |        |       |        |         |
| China   | Jiangxi     | Jingdezhen |       |      | 1    |     |        |       |        |         |
| China   | Jiangxi     | Jingdezhen |       | 1    |      |     |        |       |        |         |
| China   | Zhejiang    | Longquan   |       | 22   |      |     |        |       |        |         |
| China   | Zhejiang    | Longquan   |       |      | 23   |     |        |       |        |         |
| China   | Zhejiang    | Longquan   |       |      |      |     | 2      |       |        |         |
| China   | Zhejiang    | Longquan   | 1     |      |      |     |        |       |        |         |
| China   | Zhejiang    | Longquan   |       |      |      |     |        |       | 2      |         |
| China   | South China |            |       |      |      | 17  |        |       |        |         |

**Cluster 2 Pre-1400 Definite.** We recovered 169 sherds that date prior to 1400.

| Country | Region    | Sub-Region | Basin | Bowl | Dish | Jar | Jarlet | Kendi | Saucer | Washer | Unknown |
|---------|-----------|------------|-------|------|------|-----|--------|-------|--------|--------|---------|
| China   | Fujian    | Cizao      |       |      |      | 2   |        |       |        |        |         |
| China   | Fujian    | Dehua      |       | 1    |      |     |        |       |        |        |         |
| China   | Fujian    | Tongan     |       | 22   |      |     |        |       |        |        |         |
| China   | Fujian    |            |       | 35   |      |     |        |       |        |        |         |
| China   | Fujian    |            |       |      |      |     | 1      |       |        |        |         |
| China   | Fujian    |            |       |      |      |     |        | 1     |        |        |         |
| China   | Guangdong | Guangzhou  | 3     |      |      |     |        |       |        |        |         |
| China   | Guangdong | Guangzhou  |       |      |      | 3   |        |       |        |        |         |
| China   | Guangdong | Guangzhou  |       |      |      |     |        |       |        |        | 1       |
| China   | Guangdong |            | 1     |      |      |     |        |       |        |        |         |
| China   | Guangdong |            |       | 1    |      |     |        |       |        |        |         |
| China   | Guangdong |            |       |      |      | 35  |        |       |        |        |         |
| China   | Jiangxi   | Jingdezhen |       |      | 1    |     |        |       |        |        |         |
| China   | Jiangxi   | Jingdezhen |       | 1    |      |     |        |       |        |        |         |
| China   | Zhejiang  | Longquan   |       | 27   |      |     |        |       |        |        |         |
| China   | Zhejiang  | Longquan   |       |      | 24   |     |        |       |        |        |         |
| China   | Zhejiang  | Longquan   |       |      |      | 2   |        |       |        |        |         |
| China   | Zhejiang  | Longquan   | 1     |      |      |     |        |       |        |        |         |
| China   | Zhejiang  | Longquan   |       |      |      |     |        |       | 2      |        |         |
| China   | Zhejiang  | Longquan   |       |      |      |     |        |       |        | 2      |         |
| China   |           |            |       |      |      | 17  |        |       |        |        |         |

**Cluster 2 Pre-1400 Possible.** We recovered 183 sherds that might have been produced prior to 1400.

| Country  | Region | Sub-Region | Bowl | Jar |
|----------|--------|------------|------|-----|
| Burma    |        |            | 1    |     |
| China    | Fujian |            | 1    |     |
| China    | Fujian | Longquan   | 2    |     |
| China    |        |            |      | 1   |
| Thailand |        |            | 1    |     |

**Cluster 2 1400 - 1450 Definite.** We recovered 6 sherds that were produced between 1400 and 1450.

| Country  | Region    | Sub-Region | Bowl | Dish | Jar | Saucer |
|----------|-----------|------------|------|------|-----|--------|
| Burma    |           |            | 1    |      |     |        |
| China    | Fujian    |            | 6    |      |     |        |
| China    | Zhejiang  | Longquan   | 7    |      |     |        |
| China    | Zhejiang  | Longquan   |      | 2    |     |        |
| China    | Zhejiang  | Longquan   |      |      |     | 1      |
| China    |           |            |      |      | 3   |        |
| Thailand | Sukhothai | Sukhothai  | 1    |      |     |        |
| Thailand |           |            | 1    |      |     |        |

**Cluster 2 1400 - 1450 Possible.** We recovered 22 sherds that might have been produced between 1400 and 1450.

| Country | Region | Sub-Region | Bottle Jar | Bowl | Covered Box | Dish | Jar |
|---------|--------|------------|------------|------|-------------|------|-----|
| Burma   | Mon    | Martaban   |            |      |             | 2    |     |
| Burma   | Yangon | Twante     |            | 34   |             |      |     |
| Burma   | Yangon | Twante     |            |      |             |      | 1   |
| Burma   |        |            |            | 78   |             |      |     |
| Burma   |        |            |            |      |             | 42   |     |

|          |           |             |   |    |   |  |    |    |  |
|----------|-----------|-------------|---|----|---|--|----|----|--|
| China    | Fujian    |             |   | 1  |   |  |    |    |  |
| China    | Jiangxi   | Jingdezhen  |   | 22 |   |  |    |    |  |
| China    | Jiangxi   | Jingdezhen  |   |    | 1 |  |    |    |  |
| China    | Jiangxi   | Jingdezhen  |   |    |   |  | 19 |    |  |
| China    | Jiangxi   | Jingdezhen  |   |    |   |  |    | 1  |  |
| China    | Zhejiang  | Longquan    |   | 2  |   |  |    |    |  |
| China    | Zhejiang  | Longquan    |   |    |   |  | 1  |    |  |
| China    |           |             |   |    |   |  |    | 1  |  |
| Thailand | Satun     | Kalong      |   | 1  |   |  |    |    |  |
| Thailand | Singburi  |             |   |    |   |  |    | 1  |  |
| Thailand | Sukhothai | Sawankhalok | 1 |    |   |  |    |    |  |
| Thailand | Sukhothai | Sawankhalok |   | 9  |   |  |    |    |  |
| Thailand |           |             | 8 |    |   |  |    |    |  |
| Thailand |           |             |   | 7  |   |  |    |    |  |
| Thailand |           |             |   |    | 1 |  |    |    |  |
| Thailand |           |             |   |    |   |  |    | 10 |  |

**Cluster 2 1450 - 1550 Definite.** We recovered 243 sherds that were produced between 1450 and 1550. The maximum total sherds that could have been produced between 1450 and 1550 is 245 (no table included).

| Country | Region | Sub-Region | Bowl | Covered Box | Cup | Dish | Jar | Lid | Stem Bowl | Unknown |
|---------|--------|------------|------|-------------|-----|------|-----|-----|-----------|---------|
| Burma   | Karen  | Kaw Don    | 10   |             |     |      |     |     |           |         |
| Burma   | Mon    | Martaban   |      |             |     | 1    |     |     |           |         |
| Burma   | Mon    | Martaban   |      |             |     |      | 20  |     |           |         |
| Burma   |        |            |      |             |     |      | 38  |     |           |         |
| Burma   |        |            | 13   |             |     |      |     |     |           |         |

|       |         |            |     |   |   |     |   |   |  |   |  |
|-------|---------|------------|-----|---|---|-----|---|---|--|---|--|
| China | Fujian  | Dehua      | 1   |   |   |     |   |   |  |   |  |
| China | Fujian  | Zhangzhou  | 44  |   |   |     |   |   |  |   |  |
| China | Fujian  | Zhangzhou  |     |   |   | 163 |   |   |  |   |  |
| China | Fujian  | Zhangzhou  |     |   |   |     | 1 |   |  |   |  |
| China | Fujian  | Zhangzhou  |     |   |   |     |   |   |  | 3 |  |
| China | Fujian  |            | 111 |   |   |     |   |   |  |   |  |
| China | Fujian  |            |     |   |   | 4   |   |   |  |   |  |
| China | Jiangxi | Jingdezhen | 26  |   |   |     |   |   |  |   |  |
| China | Jiangxi | Jingdezhen |     | 3 |   |     |   |   |  |   |  |
| China | Jiangxi | Jingdezhen |     |   |   |     |   | 1 |  |   |  |
| China | Jiangxi | Jingdezhen |     |   | 2 |     |   |   |  |   |  |
| China | Jiangxi | Jingdezhen |     |   |   | 9   |   |   |  |   |  |
| China | Jiangxi | Jingdezhen |     |   | 1 |     |   |   |  |   |  |
| China |         |            |     |   |   |     | 1 |   |  |   |  |
| Japan | Hizen   |            | 2   |   |   |     |   |   |  |   |  |

**Cluster 2 1550 - 1650 Definite.** We recovered 454 sherds that were produced between 1550 and 1650.

| Country | Region | Sub-Region | Bottle Jar | Bowl | Covered Box | Cup | Dish | Jar | Lid | Potiche | Stem Bowl | Unknown |
|---------|--------|------------|------------|------|-------------|-----|------|-----|-----|---------|-----------|---------|
| Burma   | Karen  | Kaw Don    |            | 10   |             |     |      |     |     |         |           |         |
| Burma   | Mon    | Martaban   |            |      |             |     | 1    |     |     |         |           |         |
| Burma   | Mon    | Martaban   |            |      |             |     |      | 34  |     |         |           |         |
| Burma   |        |            |            |      |             |     | 1    |     |     |         |           |         |
| Burma   |        |            |            |      |             |     |      | 87  |     |         |           |         |
| Burma   |        |            |            | 13   |             |     |      |     |     |         |           |         |
| China   | Fujian | Dehua      |            | 2    |             |     |      |     |     |         |           |         |

|          |           |             |   |    |   |     |   |   |   |  |   |   |
|----------|-----------|-------------|---|----|---|-----|---|---|---|--|---|---|
| China    | Fujian    | Dehua       |   |    | 1 |     |   |   |   |  |   |   |
| China    | Fujian    | Dehua       |   |    |   | 1   |   |   |   |  |   |   |
| China    | Fujian    | Dehua       |   |    |   |     |   | 4 |   |  |   |   |
| China    | Fujian    | Dehua       |   |    |   |     |   |   | 4 |  |   |   |
| China    | Fujian    | Zhangzhou   |   | 50 |   |     |   |   |   |  |   |   |
| China    | Fujian    | Zhangzhou   |   |    |   | 164 |   |   |   |  |   |   |
| China    | Fujian    | Zhangzhou   |   |    |   |     |   | 1 |   |  |   |   |
| China    | Fujian    | Zhangzhou   |   |    |   |     |   |   |   |  |   | 4 |
| China    | Fujian    |             |   | 33 |   |     |   |   |   |  |   |   |
| China    | Fujian    |             |   | 82 |   | 15  |   |   |   |  |   |   |
| China    | Jiangxi   | Jingdezhen  |   | 27 |   |     |   |   |   |  |   |   |
| China    | Jiangxi   | Jingdezhen  |   |    | 3 |     |   |   |   |  |   |   |
| China    | Jiangxi   | Jingdezhen  |   |    |   |     |   |   |   |  | 1 |   |
| China    | Jiangxi   | Jingdezhen  |   |    |   | 4   |   |   |   |  |   |   |
| China    | Jiangxi   | Jingdezhen  |   |    |   |     | 9 |   |   |  |   |   |
| China    |           |             |   |    |   |     |   | 3 |   |  |   |   |
| Japan    | Hizen     |             |   | 2  |   |     |   |   |   |  |   |   |
| Japan    | Hizen     |             |   |    |   |     | 1 |   |   |  |   |   |
| Thailand | Sukhothai | Sawankhalok | 1 |    |   |     |   |   |   |  |   |   |
| Thailand |           |             | 1 |    |   |     |   |   |   |  |   |   |
| Thailand |           |             |   |    | 1 |     |   |   |   |  |   |   |

**Cluster 2 1550 – 1650 Possible.** We recovered 560 sherds that might have been produced between 1550 and 1650.

| Country | Region  | Sub-Region | Basin | Bottle | Bowl | Covered Box | Cup | Dish | Jar | Lid | Platter | Potiche | Saucer |
|---------|---------|------------|-------|--------|------|-------------|-----|------|-----|-----|---------|---------|--------|
| Burma   | Mon     | Martaban   |       |        | 1    |             |     |      |     |     |         |         |        |
| Burma   | Mon     | Martaban   |       |        |      |             |     |      | 3   |     |         |         |        |
| China   | Fujian  | Dehua      |       |        | 25   |             |     |      |     |     |         |         |        |
| China   | Fujian  | Dehua      |       |        |      |             |     | 9    |     |     |         |         |        |
| China   | Fujian  | Dehua      |       |        |      |             |     |      |     |     |         | 3       |        |
| China   | Fujian  | Zhangzhou  |       |        | 28   |             |     |      |     |     |         |         |        |
| China   | Fujian  | Zhangzhou  |       |        |      |             |     | 13   |     |     |         |         |        |
| China   | Fujian  |            |       |        | 389  |             |     |      |     |     |         |         |        |
| China   | Fujian  |            |       |        |      |             |     | 40   |     |     |         |         |        |
| China   | Fujian  |            |       |        |      |             |     |      | 15  |     |         |         |        |
| China   | Fujian  |            |       |        |      |             |     |      |     |     |         | 3       |        |
| China   | Fujian  |            |       |        |      |             |     |      |     |     |         |         |        |
| China   | Jiangxi | Jingdezhen |       |        | 34   |             |     |      |     |     |         |         |        |
| China   | Jiangxi | Jingdezhen |       |        |      |             |     |      |     | 4   |         |         |        |
| China   | Jiangxi | Jingdezhen |       |        |      |             | 2   |      |     |     |         |         |        |
| China   | Jiangxi | Jingdezhen |       |        |      |             |     | 12   |     |     |         |         |        |
| China   | Jiangxi | Jingdezhen |       |        |      |             |     |      |     |     |         | 1       |        |
| China   |         |            |       |        |      |             |     |      | 3   |     |         |         |        |
| China   |         |            | 1     |        |      |             |     |      |     |     |         |         |        |
| Japan   | Hizen   |            |       | 1      |      |             |     |      |     |     |         |         |        |
| Japan   | Hizen   |            |       |        | 31   |             |     |      |     |     |         |         |        |
| Japan   | Hizen   |            |       |        |      | 3           |     |      |     |     |         |         |        |
| Japan   | Hizen   |            |       |        |      |             |     | 132  |     |     |         |         |        |
| Japan   | Hizen   |            |       |        |      |             |     |      |     |     | 2       |         |        |
| Japan   | Hizen   |            |       |        |      |             |     |      |     | 1   |         |         |        |



|         |           |        |  |  |    |  |  |  |  |  |  |  |   |   |
|---------|-----------|--------|--|--|----|--|--|--|--|--|--|--|---|---|
| Japan   | Hizen     |        |  |  |    |  |  |  |  |  |  |  | 4 |   |
| Japan   | Hizen     |        |  |  |    |  |  |  |  |  |  |  |   | 1 |
| Vietnam | Hai Duong | Hop Le |  |  | 13 |  |  |  |  |  |  |  |   |   |

**Cluster 2 1650 – 1800 Definite.** We recovered 774 sherds that were produced between 1650 and 1800.

| Country | Region  | Sub-Region | Basin | Bottle | Bowl | Covered Box | Cup | Dish | Jar | Lid | Platter | Potiche | Saucer |
|---------|---------|------------|-------|--------|------|-------------|-----|------|-----|-----|---------|---------|--------|
| Burma   | Mon     | Martaban   |       |        |      |             |     |      | 17  |     |         |         |        |
| Burma   | Mon     | Martaban   |       |        | 1    |             |     |      |     |     |         |         |        |
| Burma   |         |            |       |        |      |             |     | 1    |     |     |         |         |        |
| Burma   |         |            |       |        |      |             |     |      | 49  |     |         |         |        |
| China   | Fujian  | Dehua      |       |        | 31   |             |     |      |     |     |         |         |        |
| China   | Fujian  | Dehua      |       |        |      | 1           |     |      |     |     |         |         |        |
| China   | Fujian  | Dehua      |       |        |      |             | 1   |      |     |     |         |         |        |
| China   | Fujian  | Dehua      |       |        |      |             |     | 14   |     |     |         |         |        |
| China   | Fujian  | Dehua      |       |        |      |             |     |      |     |     |         | 7       |        |
| China   | Fujian  | Dehua      |       |        |      |             |     |      |     | 4   |         |         |        |
| China   | Fujian  | Zhangzhou  |       |        | 32   |             |     |      |     |     |         |         |        |
| China   | Fujian  | Zhangzhou  |       |        |      |             |     | 18   |     |     |         |         |        |
| China   | Fujian  |            |       |        | 404  |             |     |      |     |     |         |         |        |
| China   | Fujian  |            |       |        |      |             |     |      |     | 4   |         |         |        |
| China   | Fujian  |            |       |        |      |             |     | 67   |     |     |         |         |        |
| China   | Fujian  |            |       |        |      |             |     |      | 15  |     |         |         |        |
| China   | Fujian  |            |       |        |      |             |     |      |     |     | 3       |         |        |
| China   | Jiangxi | Jingdezhen |       |        | 35   |             |     |      |     |     |         |         |        |
| China   | Jiangxi | Jingdezhen |       |        |      |             |     |      |     | 4   |         |         |        |

|         |           |            |   |   |    |   |   |     |   |   |   |   |  |
|---------|-----------|------------|---|---|----|---|---|-----|---|---|---|---|--|
| China   | Jiangxi   | Jingdezhen |   |   |    |   | 3 |     |   |   |   |   |  |
| China   | Jiangxi   | Jingdezhen |   |   |    |   |   | 12  |   |   |   |   |  |
| China   | Jiangxi   | Jingdezhen |   |   |    |   |   |     |   |   |   | 1 |  |
| China   |           |            |   |   |    |   |   |     | 5 |   |   |   |  |
| China   |           |            | 1 |   |    |   |   |     |   |   |   |   |  |
| Japan   | Hizen     |            |   | 1 |    |   |   |     |   |   |   |   |  |
| Japan   | Hizen     |            |   |   | 32 |   |   |     |   |   |   |   |  |
| Japan   | Hizen     |            |   |   |    | 2 |   |     |   |   |   |   |  |
| Japan   | Hizen     |            |   |   |    |   |   | 133 |   |   |   |   |  |
| Japan   | Hizen     |            |   |   |    |   |   |     |   | 2 |   |   |  |
| Japan   | Hizen     |            |   |   |    |   |   |     | 1 |   |   |   |  |
| Japan   | Hizen     |            |   |   |    |   |   |     |   |   | 4 |   |  |
| Japan   | Hizen     |            |   |   |    |   |   |     |   |   |   | 1 |  |
| Vietnam | Hai Duong | Hop Le     |   |   | 13 |   |   |     |   |   |   |   |  |

**Cluster 2 1650 – 1800 Possible.** We recovered 919 sherds that might have been produced between 1650 and 1800.

### CLUSTER 3 TRADE CERAMICS

| Country | Region    | Sub-Region | Basin | Bowl | Dish | Jar | Pot | Unknown |
|---------|-----------|------------|-------|------|------|-----|-----|---------|
| China   | Fujian    | Cizao      |       |      |      | 2   |     |         |
| China   | Fujian    | Tongan     |       | 2    |      |     |     |         |
| China   | Guangdong |            | 15    |      |      |     |     |         |
| China   | Guangdong |            |       |      |      | 49  |     |         |
| China   | Guangdong |            |       |      |      |     | 3   |         |
| China   | Zhejiang  | Longquan   |       | 2    |      |     |     |         |
| China   | Zhejiang  | Longquan   |       |      | 2    |     |     |         |
| China   | Zhejiang  | Longquan   |       |      |      |     |     | 1       |

**Cluster 3 Pre-1400.** We recovered 76 sherds that date prior to 1400. We recovered 77 sherds that might date from this period (table not included).

| Country | Region   | Sub-Region | Bowl |
|---------|----------|------------|------|
| China   | Zhejiang | Longquan   | 1    |

**Cluster 3 1400 – 1450 Definite.** We recovered 1 sherd that was produced between 1400 and 1450.

| Country  | Region    | Sub-Region  | Bowl | Dish | Jar |
|----------|-----------|-------------|------|------|-----|
| Burma    | Mon       | Martaban    | 5    |      |     |
| Burma    | Mon       | Martaban    |      | 10   |     |
| Burma    | Mon       | Martaban    |      |      | 23  |
| China    | Guangdong |             |      |      | 1   |
| China    | Zhejiang  | Longquan    | 1    |      |     |
| Thailand | Sukhothai | Sawankhalok |      | 6    |     |

**Cluster 3 1400 – 1450 Possible.** We recovered 46 sherds that might have been produced between 1400 and 1450.

| Country  | Region    | Sub-Region  | Bowl | Covered Box | Dish | Jar | Lid |
|----------|-----------|-------------|------|-------------|------|-----|-----|
| Burma    | Mon       | Martaban    | 5    |             |      |     |     |
| Burma    | Mon       | Martaban    |      |             | 55   |     |     |
| Burma    | Mon       | Martaban    |      |             |      | 1   |     |
| China    | Jiangxi   | Jingdezhen  | 5    |             |      |     |     |
| China    | Jiangxi   | Jingdezhen  |      |             | 34   |     |     |
| China    | Jiangxi   | Jingdezhen  |      |             |      | 1   |     |
| China    | Jiangxi   | Jingdezhen  |      |             |      |     | 1   |
| Thailand | Sukhothai | Sawankhalok |      | 1           |      |     |     |
| Thailand | Sukhothai | Sawankhalok |      |             | 2    |     |     |
| Thailand | Sukhothai | Sawankhalok |      |             |      | 1   |     |
| Thailand | Sukhothai | Sawankhalok |      |             |      |     | 1   |

**Cluster 3 1450 – 1550 Definite.** We recovered 107 sherd that were produced between 1450 and 1550.

| Country  | Region    | Sub-Region  | Basin | Bowl | Covered Box | Dish | Jar | Lid |
|----------|-----------|-------------|-------|------|-------------|------|-----|-----|
| Burma    | Mon       | Martaban    | 1     |      |             |      |     |     |
| Burma    | Mon       | Martaban    |       | 13   |             |      |     |     |
| Burma    | Mon       | Martaban    |       |      |             | 70   |     |     |
| Burma    | Mon       | Martaban    |       |      |             |      | 32  |     |
| China    | Guangdong |             |       |      |             |      | 1   |     |
| China    | Jiangxi   | Jingdezhen  |       | 5    |             |      |     |     |
| China    | Jiangxi   | Jingdezhen  |       |      |             | 34   |     |     |
| China    | Jiangxi   | Jingdezhen  |       |      |             |      | 1   |     |
| China    | Jiangxi   | Jingdezhen  |       |      |             |      |     | 1   |
| Thailand | Sukhothai | Sawankhalok |       | 1    |             |      |     |     |

|          |           |             |  |  |   |   |   |   |  |
|----------|-----------|-------------|--|--|---|---|---|---|--|
| Thailand | Sukhothai | Sawankhalok |  |  | 1 |   |   |   |  |
| Thailand | Sukhothai | Sawankhalok |  |  |   | 8 |   |   |  |
| Thailand | Sukhothai | Sawankhalok |  |  |   |   | 2 |   |  |
| Thailand | Sukhothai | Sawankhalok |  |  |   |   |   | 1 |  |

**Cluster 3 1450 – 1550 Possible.** We recovered 171 sherds that could have been produced between 1450 and 1550.

| Country | Region  | Sub-Region | Bowl | Covered Box | Cup | Dish | Jar | Lid | Pot | Potiche | Unknown |
|---------|---------|------------|------|-------------|-----|------|-----|-----|-----|---------|---------|
| Burma   | Mon     | Martaban   | 4    |             |     |      |     |     |     |         |         |
| Burma   | Mon     | Martaban   |      |             |     | 6    |     |     |     |         |         |
| Burma   | Mon     | Martaban   |      |             |     |      | 56  |     |     |         |         |
| Burma   | Mon     | Martaban   |      |             |     |      |     |     | 2   |         |         |
| China   | Fujian  | Dehua      | 2    |             |     |      |     |     |     |         |         |
| China   | Fujian  | Dehua      |      |             |     | 1    |     |     |     |         |         |
| China   | Fujian  | Zhangzhou  | 169  |             |     |      |     |     |     |         |         |
| China   | Fujian  | Zhangzhou  |      |             |     | 235  |     |     |     |         |         |
| China   | Fujian  | Zhangzhou  |      |             |     |      | 2   |     |     |         |         |
| China   | Fujian  | Zhangzhou  |      |             |     |      |     | 1   |     |         |         |
| China   | Jiangxi | Jingdezhen | 70   |             |     |      |     |     |     |         |         |
| China   | Jiangxi | Jingdezhen |      | 3           |     |      |     |     |     |         |         |
| China   | Jiangxi | Jingdezhen |      |             | 1   |      |     |     |     |         |         |
| China   | Jiangxi | Jingdezhen |      |             |     | 30   |     |     |     |         |         |
| China   | Jiangxi | Jingdezhen |      |             |     |      | 1   |     |     |         |         |
| China   | Jiangxi | Jingdezhen |      |             |     |      |     | 2   |     |         |         |
| China   | Jiangxi | Jingdezhen |      |             |     |      |     |     |     | 3       |         |
| China   | Jiangxi | Jingdezhen |      |             |     |      |     |     |     |         | 2       |

|       |       |  |  |  |  |   |  |  |  |  |  |  |  |
|-------|-------|--|--|--|--|---|--|--|--|--|--|--|--|
| Japan | Hizen |  |  |  |  | 2 |  |  |  |  |  |  |  |
|-------|-------|--|--|--|--|---|--|--|--|--|--|--|--|

**Cluster 3 1550 – 1650 Definite.** We recovered 592 sherds that were produced between 1550 and 1650.

| Country | Region  | Sub-Region | Basin | Bowl | Covered Box | Cup | Dish | Jar | Lid | Pot | Potiche | Vase | Unknown |
|---------|---------|------------|-------|------|-------------|-----|------|-----|-----|-----|---------|------|---------|
| Burma   | Mon     | Martaban   | 1     |      |             |     |      |     |     |     |         |      |         |
| Burma   | Mon     | Martaban   |       | 17   |             |     |      |     |     |     |         |      |         |
| Burma   | Mon     | Martaban   |       |      |             |     | 98   |     |     |     |         |      |         |
| Burma   | Mon     | Martaban   |       |      |             |     |      | 256 |     |     |         |      |         |
| Burma   | Mon     | Martaban   |       |      |             |     |      |     |     | 2   |         |      |         |
| China   | Fujian  | Dehua      |       | 4    |             |     |      |     |     |     |         |      |         |
| China   | Fujian  | Dehua      |       |      | 2           |     |      |     |     |     |         |      |         |
| China   | Fujian  | Dehua      |       |      |             |     | 1    |     |     |     |         |      |         |
| China   | Fujian  | Dehua      |       |      |             |     |      |     | 10  |     |         |      |         |
| China   | Fujian  | Dehua      |       |      |             |     |      |     |     |     | 6       |      |         |
| China   | Fujian  | Shaowu     |       |      |             |     |      | 3   |     |     |         |      |         |
| China   | Fujian  | Zhangzhou  |       | 173  |             |     |      |     |     |     |         |      |         |
| China   | Fujian  | Zhangzhou  |       |      |             |     | 235  |     |     |     |         |      |         |
| China   | Fujian  | Zhangzhou  |       |      |             |     |      | 2   |     |     |         |      |         |
| China   | Fujian  | Zhangzhou  |       |      |             |     |      |     | 1   |     |         |      |         |
| China   | Jiangxi | Jingdezhen |       | 73   |             |     |      |     |     |     |         |      |         |
| China   | Jiangxi | Jingdezhen |       |      | 3           |     |      |     |     |     |         |      |         |
| China   | Jiangxi | Jingdezhen |       |      |             | 1   |      |     |     |     |         |      |         |
| China   | Jiangxi | Jingdezhen |       |      |             |     | 31   |     |     |     |         |      |         |
| China   | Jiangxi | Jingdezhen |       |      |             |     |      | 1   |     |     |         |      |         |
| China   | Jiangxi | Jingdezhen |       |      |             |     |      |     | 2   |     |         |      |         |

|          |           |             |  |   |  |  |   |   |  |  |   |   |   |
|----------|-----------|-------------|--|---|--|--|---|---|--|--|---|---|---|
| China    | Jiangxi   | Jingdezhen  |  |   |  |  |   |   |  |  | 3 |   |   |
| China    | Jiangxi   | Jingdezhen  |  |   |  |  |   |   |  |  |   |   | 2 |
| China    | Jiangxi   | Jingdezhen  |  |   |  |  |   |   |  |  |   | 1 |   |
| Japan    | Hizen     |             |  |   |  |  | 2 |   |  |  |   |   |   |
| Thailand | Sukhothai | Sawankhalok |  | 1 |  |  |   |   |  |  |   |   |   |
| Thailand | Sukhothai | Sawankhalok |  |   |  |  |   | 2 |  |  |   |   |   |

**Cluster 3 1550 – 1650 Possible.** We recovered 933 sherds that might have been produced between 1550 and 1650.

| Country | Region  | Sub-Region | Bowl | Cup | Dish | Jar | Lid | Potiche | Vase | Unknown |
|---------|---------|------------|------|-----|------|-----|-----|---------|------|---------|
| Burma   | Mon     | Martaban   |      |     | 6    |     |     |         |      |         |
| Burma   | Mon     | Martaban   |      |     |      | 2   |     |         |      |         |
| China   | Fujian  | Dehua      | 27   |     |      |     |     |         |      |         |
| China   | Fujian  | Dehua      |      | 1   |      |     |     |         |      |         |
| China   | Fujian  | Dehua      |      |     | 9    |     |     |         |      |         |
| China   | Fujian  | Dehua      |      |     |      |     | 1   |         |      |         |
| China   | Fujian  | Shaowu     |      |     |      | 1   |     |         |      |         |
| China   | Fujian  | Zhangzhou  | 307  |     |      |     |     |         |      |         |
| China   | Fujian  | Zhangzhou  |      |     | 38   |     |     |         |      |         |
| China   | Fujian  | Zhangzhou  |      |     |      |     | 6   |         |      |         |
| China   | Fujian  | Zhangzhou  |      |     |      |     |     | 1       |      |         |
| China   | Fujian  |            | 6    |     |      |     |     |         |      |         |
| China   | Jiangxi | Jingdezhen | 38   |     |      |     |     |         |      |         |
| China   | Jiangxi | Jingdezhen |      |     | 26   |     |     |         |      |         |
| China   | Jiangxi | Jingdezhen |      |     |      |     | 10  |         |      |         |
| China   | Jiangxi | Jingdezhen |      |     |      |     |     | 18      |      |         |

|         |           |            |    |  |     |  |   |   |   |   |
|---------|-----------|------------|----|--|-----|--|---|---|---|---|
| China   | Jiangxi   | Jingdezhen |    |  |     |  |   |   | 1 |   |
| China   | Jiangxi   | Jingdezhen |    |  |     |  |   |   |   | 1 |
| China   | Zhejiang  | Longquan   |    |  | 1   |  |   |   |   |   |
| Japan   | Hizen     |            | 29 |  |     |  |   |   |   |   |
| Japan   | Hizen     |            |    |  | 157 |  |   |   |   |   |
| Japan   | Hizen     |            |    |  |     |  | 1 |   |   |   |
| Japan   | Hizen     |            |    |  |     |  |   | 2 |   |   |
| Vietnam | Hai Duong | Hop Le     | 38 |  |     |  |   |   |   |   |

**Cluster 3 1650 – 1800 Definite.** We recovered 727 sherds that were produced between 1650 and 1800.

| Country | Region | Sub-Region | Bowl | Covered Box | Cup | Dish | Jar | Lid | Potiche | Tea Pot | Vase | Unknown |
|---------|--------|------------|------|-------------|-----|------|-----|-----|---------|---------|------|---------|
| Burma   | Mon    | Martaban   | 10   |             |     |      |     |     |         |         |      |         |
| Burma   | Mon    | Martaban   |      |             |     | 93   |     |     |         |         |      |         |
| Burma   | Mon    | Martaban   |      |             |     |      | 194 |     |         |         |      |         |
| China   | Fujian | Dehua      | 47   |             |     |      |     |     |         |         |      |         |
| China   | Fujian | Dehua      |      | 2           |     |      |     |     |         |         |      |         |
| China   | Fujian | Dehua      |      |             | 1   |      |     |     |         |         |      |         |
| China   | Fujian | Dehua      |      |             |     | 18   |     |     |         |         |      |         |
| China   | Fujian | Dehua      |      |             |     |      |     | 11  |         |         |      |         |
| China   | Fujian | Dehua      |      |             |     |      |     |     | 6       |         |      |         |
| China   | Fujian | Shaowu     |      |             |     |      | 4   |     |         |         |      |         |
| China   | Fujian | Zhangzhou  | 384  |             |     |      |     |     |         |         |      |         |
| China   | Fujian | Zhangzhou  |      |             |     | 53   |     |     |         |         |      |         |
| China   | Fujian | Zhangzhou  |      |             |     |      |     | 6   |         |         |      |         |
| China   | Fujian | Zhangzhou  |      |             |     |      |     |     | 1       |         |      |         |



|          |           |             |    |  |  |     |    |    |   |   |   |  |
|----------|-----------|-------------|----|--|--|-----|----|----|---|---|---|--|
| China    | Fujian    |             | 6  |  |  |     |    |    |   |   |   |  |
| China    | Jiangsu   | Yixing      |    |  |  |     |    |    | 2 |   |   |  |
| China    | Jiangxi   | Jingdezhen  | 41 |  |  |     |    |    |   |   |   |  |
| China    | Jiangxi   | Jingdezhen  |    |  |  | 27  |    |    |   |   |   |  |
| China    | Jiangxi   | Jingdezhen  |    |  |  |     | 10 |    |   |   |   |  |
| China    | Jiangxi   | Jingdezhen  |    |  |  |     |    | 18 |   |   |   |  |
| China    | Jiangxi   | Jingdezhen  |    |  |  |     |    |    |   |   | 1 |  |
| China    | Jiangxi   | Jingdezhen  |    |  |  |     |    |    |   | 2 |   |  |
| China    | Zhejiang  | Longquan    |    |  |  | 1   |    |    |   |   |   |  |
| Japan    | Hizen     |             | 29 |  |  |     |    |    |   |   |   |  |
| Japan    | Hizen     |             |    |  |  | 157 |    |    |   |   |   |  |
| Japan    | Hizen     |             |    |  |  |     | 1  |    |   |   |   |  |
| Japan    | Hizen     |             |    |  |  |     |    | 2  |   |   |   |  |
| Thailand | Sukhothai | Sawankhalok |    |  |  | 1   |    |    |   |   |   |  |
| Vietnam  | Hai Duong | Hop Le      | 38 |  |  |     |    |    |   |   |   |  |

**Cluster 3 1650 – 1800 Possible.** We recovered 1,166 sherds that might have been produced between 1650 and 1800.

### CLUSTER 4 TRADE CERAMICS

| Country | Region    | Sub-Region | Bowl | Box | Dish | Jar | Jarlet | Washer | Unknown |
|---------|-----------|------------|------|-----|------|-----|--------|--------|---------|
| China   | Fujian    | Cizao      |      |     |      | 1   |        |        |         |
| China   | Fujian    | Tongan     | 3    |     |      |     |        |        |         |
| China   | Fujian    |            | 36   |     |      |     |        |        |         |
| China   | Fujian    |            |      |     | 3    |     |        |        |         |
| China   | Fujian    |            |      |     |      | 5   |        |        |         |
| China   | Fujian    |            |      |     |      |     | 2      |        |         |
| China   | Guangdong |            | 2    |     |      |     |        |        |         |
| China   | Guangdong |            |      |     |      | 7   |        |        |         |
| China   | Jiangxi   | Jingdezhen | 2    |     |      |     |        |        |         |
| China   | Jiangxi   | Jingdezhen |      | 1   |      |     |        |        |         |
| China   | Jiangxi   | Jingdezhen |      |     | 1    |     |        |        |         |
| China   | Jiangxi   | Jingdezhen |      |     |      | 1   |        |        |         |
| China   | Zhejiang  | Longquan   | 36   |     |      |     |        |        |         |
| China   | Zhejiang  | Longquan   |      |     | 8    |     |        |        |         |
| China   | Zhejiang  | Longquan   |      |     |      | 1   |        |        |         |
| China   | Zhejiang  | Longquan   |      |     |      |     | 1      |        |         |
| China   | Zhejiang  | Longquan   |      |     |      |     |        | 2      |         |

**Cluster 4 Pre-1400 Definite.** We recovered 112 sherds that were produced date prior to 1400.

| Country | Region | Sub-Region | Bowl | Box | Dish | Jar | Jarlet | Washer |
|---------|--------|------------|------|-----|------|-----|--------|--------|
| China   | Fujian | Cizao      |      |     |      |     |        |        |
| China   | Fujian | Cizao      |      |     |      | 3   |        |        |

|          |           |            |    |   |    |   |   |   |
|----------|-----------|------------|----|---|----|---|---|---|
| China    | Fujian    | Tongan     | 12 |   |    |   |   |   |
| China    | Fujian    |            | 36 |   |    |   |   |   |
| China    | Fujian    |            |    |   | 3  |   |   |   |
| China    | Fujian    |            |    |   |    | 5 |   |   |
| China    | Fujian    |            |    |   |    |   | 2 |   |
| China    | Guangdong |            | 2  |   |    |   |   |   |
| China    | Guangdong |            |    |   |    | 7 |   |   |
| China    | Jiangxi   | Jingdezhen | 2  |   |    |   |   |   |
| China    | Jiangxi   | Jingdezhen |    | 1 |    |   |   |   |
| China    | Jiangxi   | Jingdezhen |    |   | 1  |   |   |   |
| China    | Jiangxi   | Jingdezhen |    |   |    | 1 |   |   |
| China    | Zhejiang  | Longquan   | 36 |   |    |   |   |   |
| China    | Zhejiang  | Longquan   |    |   | 14 |   |   |   |
| China    | Zhejiang  | Longquan   |    |   |    | 1 |   |   |
| China    | Zhejiang  | Longquan   |    |   |    |   | 1 |   |
| China    | Zhejiang  | Longquan   |    |   |    |   |   | 2 |
| Thailand |           |            | 1  |   |    |   |   |   |

**Cluster 4 Pre-1400 Possible.** We recovered 130 sherds that might have been produced prior to 1400.

| Country | Region  | Sub-Region | Bowl |
|---------|---------|------------|------|
| China   | Jiangxi | Jingdezhen | 2    |

**Cluster 4 1400 - 1450 Definite.** We recovered 2 sherds that were produced between 1400 and 1450.

| Country  | Region    | Sub-Region  | Basin | Bowl | Box | Covered Box | Dish | Jar | Unknown |
|----------|-----------|-------------|-------|------|-----|-------------|------|-----|---------|
| China    | Fujian    | Tongan      |       | 9    |     |             |      |     |         |
| China    | Fujian    | Zhangzhou   |       | 1    |     |             |      |     |         |
| China    | Jiangxi   | Jingdezhen  |       | 2    |     |             |      |     |         |
| China    | Zhejiang  | Longquan    |       | 2    |     |             |      |     |         |
| China    | Zhejiang  | Longquan    |       |      |     |             | 6    |     |         |
| Thailand | Sukhothai | Sawankhalok |       | 10   |     |             |      |     |         |
| Thailand | Sukhothai | Sawankhalok |       |      |     |             | 4    |     |         |
| Thailand | Sukhothai | Sawankhalok |       |      |     |             |      |     | 2       |
| Thailand |           |             | 1     |      |     |             |      |     |         |
| Thailand |           |             |       | 11   |     |             |      |     |         |
| Thailand |           |             |       |      |     |             | 12   |     |         |
| Vietnam  | Vietnam   | Hai Duong   |       |      | 1   |             |      |     |         |
| Vietnam  | Vietnam   | Hai Duong   |       |      |     | 1           |      |     |         |
| Vietnam  | Vietnam   | Hai Duong   |       |      |     |             |      | 1   |         |

**Cluster 4 1400 - 1450 Possible.** We recovered 63 sherds that might have been produced between 1400 and 1450.

| Country | Region  | Sub-Region | Bottle | Bowl | Box | Dish | Jar | Lid |
|---------|---------|------------|--------|------|-----|------|-----|-----|
| China   | Fujian  | Zhangzhou  |        | 1    |     |      |     |     |
| China   | Fujian  |            |        | 7    |     |      |     |     |
| China   | Jiangxi | Jingdezhen | 1      |      |     |      |     |     |
| China   | Jiangxi | Jingdezhen |        | 55   |     |      |     |     |
| China   | Jiangxi | Jingdezhen |        |      | 3   |      |     |     |
| China   | Jiangxi | Jingdezhen |        |      |     | 52   |     |     |
| China   | Jiangxi | Jingdezhen |        |      |     |      |     | 2   |

|          |           |             |  |    |   |    |   |  |  |
|----------|-----------|-------------|--|----|---|----|---|--|--|
| China    | Zhejiang  | Longquan    |  | 26 |   |    |   |  |  |
| China    | Zhejiang  | Longquan    |  |    |   | 7  |   |  |  |
| Thailand | Sukhothai | Sawankhalok |  | 6  |   |    |   |  |  |
| Thailand | Sukhothai | Sawankhalok |  |    |   | 17 |   |  |  |
| Thailand | Sukhothai | Sawankhalok |  |    |   |    | 1 |  |  |
| Thailand |           |             |  | 9  |   |    |   |  |  |
| Thailand |           |             |  |    |   | 11 |   |  |  |
| Thailand |           |             |  |    |   |    | 2 |  |  |
| Vietnam  | Hai Duong |             |  |    | 1 |    |   |  |  |
| Vietnam  | Hai Duong |             |  |    |   |    | 7 |  |  |

**Cluster 4 1450 - 1550 Definite.** We recovered 208 sherds that were produced between 1450 and 1550.

| Country | Region  | Sub-Region | Basin | Bottle | Bowl | Box | Covered Box | Cup | Dish | Jar | Lid | Unknown |
|---------|---------|------------|-------|--------|------|-----|-------------|-----|------|-----|-----|---------|
| Burma   | Mon     | Martaban   |       |        |      |     |             |     |      | 2   |     |         |
| Burma   |         |            |       |        | 2    |     |             |     |      |     |     |         |
| Burma   |         |            |       |        |      |     |             |     | 2    |     |     |         |
| Burma   |         |            |       |        |      |     |             |     |      | 2   |     |         |
| China   | Fujian  | Zhangzhou  |       |        | 2    |     |             |     |      |     |     |         |
| China   | Fujian  |            |       |        | 23   |     |             |     |      |     |     |         |
| China   | Jiangxi | Jingdezhen |       | 1      |      |     |             |     |      |     |     |         |
| China   | Jiangxi | Jingdezhen |       |        |      |     |             |     |      |     |     |         |
| China   | Jiangxi | Jingdezhen |       |        | 95   |     |             |     |      |     |     |         |
| China   | Jiangxi | Jingdezhen |       |        |      | 3   |             |     |      |     |     |         |
| China   | Jiangxi | Jingdezhen |       |        |      |     |             | 1   |      |     |     |         |
| China   | Jiangxi | Jingdezhen |       |        |      |     |             |     | 56   |     |     |         |

|          |           |             |   |    |    |   |  |    |    |   |   |  |
|----------|-----------|-------------|---|----|----|---|--|----|----|---|---|--|
| China    | Jiangxi   | Jingdezhen  |   |    |    |   |  |    |    |   | 2 |  |
| China    | Zhejiang  | Longquan    |   |    | 32 |   |  |    |    |   |   |  |
| China    | Zhejiang  | Longquan    |   |    |    |   |  |    | 10 |   |   |  |
| China    | Zhejiang  | Longquan    |   |    |    |   |  |    |    | 1 |   |  |
| Thailand | Sukhothai | Sawankhalok |   | 20 |    |   |  |    |    |   |   |  |
| Thailand | Sukhothai | Sawankhalok |   |    | 1  |   |  |    |    |   |   |  |
| Thailand | Sukhothai | Sawankhalok |   |    |    | 1 |  |    |    |   |   |  |
| Thailand | Sukhothai | Sawankhalok |   |    |    |   |  | 27 |    |   |   |  |
| Thailand | Sukhothai | Sawankhalok |   |    |    |   |  |    | 1  |   |   |  |
| Thailand | Sukhothai | Sawankhalok |   |    |    |   |  |    |    |   | 2 |  |
| Thailand |           |             | 1 |    |    |   |  |    |    |   |   |  |
| Thailand |           |             |   |    | 30 |   |  |    |    |   |   |  |
| Thailand |           |             |   |    |    |   |  |    | 35 |   |   |  |
| Thailand |           |             |   |    |    |   |  |    |    | 4 |   |  |
| Vietnam  | Hai Duong |             |   |    | 1  |   |  |    |    |   |   |  |
| Vietnam  | Hai Duong |             |   |    |    | 4 |  |    |    |   |   |  |
| Vietnam  | Hai Duong |             |   |    |    |   |  |    | 1  |   |   |  |
| Vietnam  | Hai Duong |             |   |    |    |   |  |    |    |   | 8 |  |

**Cluster 4 1450 - 1550 Possible.** We recovered 370 sherds that might have been produced between 1450 and 1550.

| Country | Region | Sub-Region | Bottle | Bowl | Box | Cup | Dish | Incense Burner | Jar | Jarlet | Lid | Stem Cup | Unknown |
|---------|--------|------------|--------|------|-----|-----|------|----------------|-----|--------|-----|----------|---------|
| Burma   | Mon    | Martaban   |        |      |     |     |      |                | 1   |        |     |          |         |
| China   | Fujian | Dehua      |        |      |     |     | 1    |                |     |        |     |          |         |
| China   | Fujian | Zhangzhou  | 1      |      |     |     |      |                |     |        |     |          |         |
| China   | Fujian | Zhangzhou  |        | 114  |     |     |      |                |     |        |     |          |         |

|       |         |            |   |    |   |    |     |   |   |   |   |  |  |  |  |  |   |
|-------|---------|------------|---|----|---|----|-----|---|---|---|---|--|--|--|--|--|---|
| China | Fujian  | Zhangzhou  |   |    |   |    | 342 |   |   |   |   |  |  |  |  |  |   |
| China | Fujian  | Zhangzhou  |   |    |   |    |     | 1 |   |   |   |  |  |  |  |  |   |
| China | Fujian  | Zhangzhou  |   |    |   |    |     |   | 2 |   |   |  |  |  |  |  |   |
| China | Fujian  |            |   | 11 |   |    |     |   |   |   |   |  |  |  |  |  |   |
| China | Fujian  |            |   |    |   |    | 3   |   |   |   |   |  |  |  |  |  |   |
| China | Fujian  |            |   |    |   |    |     |   | 1 |   |   |  |  |  |  |  |   |
| China | Fujian  |            |   |    |   |    |     |   |   | 1 |   |  |  |  |  |  |   |
| China | Fujian  |            |   |    |   |    |     |   |   |   |   |  |  |  |  |  | 1 |
| China | Jiangxi | Jingdezhen | 1 |    |   |    |     |   |   |   |   |  |  |  |  |  |   |
| China | Jiangxi | Jingdezhen |   | 79 |   |    |     |   |   |   |   |  |  |  |  |  |   |
| China | Jiangxi | Jingdezhen |   |    | 1 |    |     |   |   |   |   |  |  |  |  |  |   |
| China | Jiangxi | Jingdezhen |   |    |   |    |     |   |   |   | 5 |  |  |  |  |  |   |
| China | Jiangxi | Jingdezhen |   |    |   | 10 |     |   |   |   |   |  |  |  |  |  |   |
| China | Jiangxi | Jingdezhen |   |    |   |    | 12  |   |   |   |   |  |  |  |  |  |   |
| China | Jiangxi | Jingdezhen |   |    |   |    |     |   |   |   |   |  |  |  |  |  | 1 |
| China | Jiangxi | Jingdezhen |   |    |   |    |     |   |   |   |   |  |  |  |  |  | 3 |

**Cluster 4 1550 – 1650 Definite.** We recovered 591 sherds that were produced between 1550 and 1650.

| Country | Region | Sub-Region | Bottle | Bowl | Box | Covered Box | Covered Jar | Cup | Dish | Incense Burner | Jar | Jarlet | Lid | Stem Bowl | Stem Cup | Tray | Vase | Unknown |
|---------|--------|------------|--------|------|-----|-------------|-------------|-----|------|----------------|-----|--------|-----|-----------|----------|------|------|---------|
| Burma   | Mon    | Martaban   |        | 9    |     |             |             |     |      |                |     |        |     |           |          |      |      |         |
| Burma   | Mon    | Martaban   |        |      |     |             |             |     | 2    |                |     |        |     |           |          |      |      |         |
| Burma   | Mon    | Martaban   |        |      |     |             |             |     |      |                | 43  |        |     |           |          |      |      |         |
| Burma   |        |            |        | 2    |     |             |             |     |      |                |     |        |     |           |          |      |      |         |
| Burma   |        |            |        |      |     |             |             |     | 3    |                |     |        |     |           |          |      |      |         |
| Burma   |        |            |        |      |     |             |             |     |      |                | 5   |        |     |           |          |      |      |         |

|       |           |            |   |     |   |   |   |     |   |    |   |  |   |  |  |  |   |  |
|-------|-----------|------------|---|-----|---|---|---|-----|---|----|---|--|---|--|--|--|---|--|
| China | Fujian    | Dehua      |   | 17  |   |   |   |     |   |    |   |  |   |  |  |  |   |  |
| China | Fujian    | Dehua      |   |     | 5 |   |   |     |   |    |   |  |   |  |  |  |   |  |
| China | Fujian    | Dehua      |   |     |   | 4 |   |     |   |    |   |  |   |  |  |  |   |  |
| China | Fujian    | Dehua      |   |     |   |   | 4 |     |   |    |   |  |   |  |  |  |   |  |
| China | Fujian    | Dehua      |   |     |   |   |   | 3   |   |    |   |  |   |  |  |  |   |  |
| China | Fujian    | Dehua      |   |     |   |   |   |     | 3 |    |   |  |   |  |  |  |   |  |
| China | Fujian    | Dehua      |   |     |   |   |   |     |   |    |   |  | 2 |  |  |  |   |  |
| China | Fujian    | Zhangzhou  | 1 |     |   |   |   |     |   |    |   |  |   |  |  |  |   |  |
| China | Fujian    | Zhangzhou  |   | 152 |   |   |   |     |   |    |   |  |   |  |  |  |   |  |
| China | Fujian    | Zhangzhou  |   |     |   |   |   | 366 |   |    |   |  |   |  |  |  |   |  |
| China | Fujian    | Zhangzhou  |   |     |   |   |   |     | 1 |    |   |  |   |  |  |  |   |  |
| China | Fujian    | Zhangzhou  |   |     |   |   |   |     |   |    | 2 |  |   |  |  |  |   |  |
| China | Fujian    |            |   | 173 |   |   |   |     |   |    |   |  |   |  |  |  |   |  |
| China | Fujian    |            |   |     |   |   | 4 |     |   |    |   |  |   |  |  |  |   |  |
| China | Fujian    |            |   |     |   |   |   | 3   |   |    |   |  |   |  |  |  |   |  |
| China | Fujian    |            |   |     |   |   |   |     |   | 23 |   |  |   |  |  |  |   |  |
| China | Fujian    |            |   |     |   |   |   |     |   |    | 1 |  |   |  |  |  |   |  |
| China | Fujian    |            |   |     |   |   |   |     |   |    |   |  |   |  |  |  | 3 |  |
| China | Fujian    |            |   |     |   |   |   |     |   |    |   |  | 2 |  |  |  |   |  |
| China | Guangdong |            |   |     |   |   |   |     |   | 1  |   |  |   |  |  |  |   |  |
| China | Jiangxi   | Jingdezhen | 1 |     |   |   |   |     |   |    |   |  |   |  |  |  |   |  |
| China | Jiangxi   | Jingdezhen |   | 171 |   |   |   |     |   |    |   |  |   |  |  |  |   |  |
| China | Jiangxi   | Jingdezhen |   |     | 1 |   |   |     |   |    |   |  |   |  |  |  |   |  |
| China | Jiangxi   | Jingdezhen |   |     |   | 2 |   |     |   |    |   |  |   |  |  |  |   |  |
| China | Jiangxi   | Jingdezhen |   |     |   |   | 1 |     |   |    |   |  |   |  |  |  |   |  |
| China | Jiangxi   | Jingdezhen |   |     |   |   |   | 18  |   |    |   |  |   |  |  |  |   |  |



|          |           |             |    |    |   |  |  |    |  |   |   |  |  |   |  |    |   |
|----------|-----------|-------------|----|----|---|--|--|----|--|---|---|--|--|---|--|----|---|
| China    | Jiangxi   | Jingdezhen  |    |    |   |  |  | 22 |  |   |   |  |  |   |  |    |   |
| China    | Jiangxi   | Jingdezhen  |    |    |   |  |  |    |  |   |   |  |  |   |  | 1  |   |
| China    | Jiangxi   | Jingdezhen  |    |    |   |  |  |    |  | 1 |   |  |  |   |  |    |   |
| China    | Jiangxi   | Jingdezhen  |    |    |   |  |  |    |  |   |   |  |  |   |  | 10 |   |
| China    | Jiangxi   | Jingdezhen  |    |    |   |  |  |    |  |   | 5 |  |  |   |  |    |   |
| China    | Jiangxi   | Jingdezhen  |    |    |   |  |  |    |  |   |   |  |  | 1 |  |    |   |
| China    | Jiangxi   | Jingdezhen  |    |    |   |  |  |    |  |   |   |  |  |   |  |    | 3 |
| China    | Zhejiang  | Longquan    |    | 4  |   |  |  |    |  |   |   |  |  |   |  |    |   |
| China    | Zhejiang  | Longquan    |    |    |   |  |  | 1  |  |   |   |  |  |   |  |    |   |
| China    | Zhejiang  | Longquan    |    |    |   |  |  |    |  | 1 |   |  |  |   |  |    |   |
| Japan    | Hizen     |             |    | 4  |   |  |  |    |  |   |   |  |  |   |  |    |   |
| Thailand | Sukhothai | Sawankhalok | 14 |    |   |  |  |    |  |   |   |  |  |   |  |    |   |
| Thailand | Sukhothai | Sawankhalok |    | 1  |   |  |  |    |  |   |   |  |  |   |  |    |   |
| Thailand | Sukhothai | Sawankhalok |    |    | 1 |  |  |    |  |   |   |  |  |   |  |    |   |
| Thailand | Sukhothai | Sawankhalok |    |    |   |  |  | 10 |  |   |   |  |  |   |  |    |   |
| Thailand | Sukhothai | Sawankhalok |    |    |   |  |  |    |  |   |   |  |  |   |  | 2  |   |
| Thailand |           |             |    | 19 |   |  |  |    |  |   |   |  |  |   |  |    |   |
| Thailand |           |             |    |    |   |  |  | 24 |  |   |   |  |  |   |  |    |   |
| Thailand |           |             |    |    |   |  |  |    |  | 2 |   |  |  |   |  |    |   |
| Vietnam  | Hai Duong |             |    | 1  |   |  |  |    |  |   |   |  |  |   |  |    |   |
| Vietnam  | Hai Duong |             |    |    | 2 |  |  |    |  |   |   |  |  |   |  |    |   |
| Vietnam  | Hai Duong |             |    |    |   |  |  | 1  |  |   |   |  |  |   |  |    |   |

**Cluster 4 1550 - 1650 Possible.** We recovered 1,158 sherds that might have been produced between 1550 and 1650.

| Country | Region | Sub-Region | Basin | Bottle | Bowl | Covered Box | Cup | Dish | Incense Burner | Jar | Lamp | Lid | Pot | Potiche | Spoon | Spoon Tray | Vase | Unknown |
|---------|--------|------------|-------|--------|------|-------------|-----|------|----------------|-----|------|-----|-----|---------|-------|------------|------|---------|
| Burma   | Mon    | Martaban   |       |        |      |             |     |      |                | 270 |      |     |     |         |       |            |      |         |
| Burma   |        |            |       |        |      |             |     |      |                |     | 1    |     |     |         |       |            |      |         |
| Burma   |        |            | 8     |        |      |             |     |      |                |     |      |     |     |         |       |            |      |         |
| Burma   |        |            |       | 1      |      |             |     |      |                |     |      |     |     |         |       |            |      |         |
| Burma   |        |            |       |        | 23   |             |     |      |                |     |      |     |     |         |       |            |      |         |
| Burma   |        |            |       |        |      |             |     | 44   |                |     |      |     |     |         |       |            |      |         |
| Burma   |        |            |       |        |      |             |     |      |                | 1   |      |     |     |         |       |            |      |         |
| Burma   |        |            |       |        |      |             |     |      |                |     |      | 1   |     |         |       |            |      |         |
| Burma   |        |            |       |        |      |             |     |      |                |     |      |     | 1   |         |       |            |      |         |
| China   | Fujian | Dehua      |       | 1      |      |             |     |      |                |     |      |     |     |         |       |            |      |         |
| China   | Fujian | Dehua      |       |        | 168  |             |     |      |                |     |      |     |     |         |       |            |      |         |
| China   | Fujian | Dehua      |       |        |      | 2           |     |      |                |     |      |     |     |         |       |            |      |         |
| China   | Fujian | Dehua      |       |        |      |             |     | 23   |                |     |      |     |     |         |       |            |      |         |
| China   | Fujian | Dehua      |       |        |      |             |     |      |                |     |      | 5   |     |         |       |            |      |         |
| China   | Fujian | Dehua      |       |        |      |             | 3   |      |                |     |      |     |     |         |       |            |      |         |
| China   | Fujian | Dehua      |       |        |      |             |     |      |                |     |      |     |     |         | 1     |            |      |         |
| China   | Fujian | Dehua      |       |        |      |             |     |      |                |     |      |     |     |         |       |            | 3    |         |
| China   | Fujian | Zhangzhou  |       |        | 286  |             |     |      |                |     |      |     |     |         |       |            |      |         |
| China   | Fujian | Zhangzhou  |       |        |      |             |     | 127  |                |     |      |     |     |         |       |            |      |         |
| China   | Fujian | Zhangzhou  |       |        |      |             |     |      |                |     |      | 2   |     |         |       |            |      |         |
| China   | Fujian | Zhangzhou  |       |        |      |             |     |      |                |     |      |     |     |         |       |            | 1    |         |
| China   | Fujian |            | 1     |        |      |             |     |      |                |     |      |     |     |         |       |            |      |         |
| China   | Fujian |            |       |        | 220  |             |     |      |                |     |      |     |     |         |       |            |      |         |
| China   | Fujian |            |       |        |      | 1           |     |      |                |     |      |     |     |         |       |            |      |         |
| China   | Fujian |            |       |        |      |             |     | 8    |                |     |      |     |     |         |       |            |      |         |

|         |           |            |  |   |    |   |  |    |     |   |   |   |  |   |  |   |   |
|---------|-----------|------------|--|---|----|---|--|----|-----|---|---|---|--|---|--|---|---|
| China   | Fujian    |            |  |   |    |   |  |    |     | 7 |   |   |  |   |  |   |   |
| China   | Fujian    |            |  |   |    |   |  |    |     |   |   |   |  |   |  |   |   |
| China   | Fujian    |            |  |   |    |   |  |    |     |   |   |   |  |   |  |   | 1 |
| China   | Fujian    |            |  |   |    |   |  | 5  |     |   |   |   |  |   |  |   |   |
| China   | Guangdong |            |  |   | 5  |   |  |    |     |   |   |   |  |   |  |   |   |
| China   | Jiangxi   | Jingdezhen |  | 3 |    |   |  |    |     |   |   |   |  |   |  |   |   |
| China   | Jiangxi   | Jingdezhen |  |   | 97 |   |  |    |     |   |   |   |  |   |  |   |   |
| China   | Jiangxi   | Jingdezhen |  |   |    |   |  |    |     |   |   | 8 |  |   |  |   |   |
| China   | Jiangxi   | Jingdezhen |  |   |    |   |  | 12 |     |   |   |   |  |   |  |   |   |
| China   | Jiangxi   | Jingdezhen |  |   |    |   |  |    | 10  |   |   |   |  |   |  |   |   |
| China   | Jiangxi   | Jingdezhen |  |   |    |   |  |    |     |   | 5 |   |  |   |  |   |   |
| China   | Jiangxi   | Jingdezhen |  |   |    |   |  |    |     |   |   |   |  | 2 |  |   |   |
| China   | Jiangxi   | Jingdezhen |  |   |    |   |  |    |     |   |   |   |  |   |  | 1 |   |
| China   | Jiangxi   | Jingdezhen |  |   |    |   |  |    |     |   |   |   |  |   |  |   | 1 |
| Japan   | Hizen     |            |  |   |    |   |  |    | 1   |   |   |   |  |   |  |   |   |
| Japan   | Hizen     |            |  |   | 19 |   |  |    |     |   |   |   |  |   |  |   |   |
| Japan   | Hizen     |            |  |   |    |   |  |    |     |   |   | 4 |  |   |  |   |   |
| Japan   | Hizen     |            |  |   |    | 2 |  |    |     |   |   |   |  |   |  |   |   |
| Japan   | Hizen     |            |  |   |    |   |  |    | 291 |   |   |   |  |   |  |   |   |
| Japan   | Hizen     |            |  |   |    |   |  |    |     | 1 |   |   |  |   |  |   |   |
| Japan   | Hizen     |            |  |   |    |   |  |    |     |   | 5 |   |  |   |  |   |   |
| Japan   | Hizen     |            |  |   |    |   |  |    |     |   |   |   |  | 6 |  |   |   |
| Japan   | Hizen     |            |  |   |    |   |  |    |     |   |   |   |  |   |  |   | 3 |
| Vietnam | Hai Duong | Hop Le     |  |   | 42 |   |  |    |     |   |   |   |  |   |  |   |   |
| Vietnam | Hai Duong | Hop Le     |  |   |    |   |  |    | 5   |   |   |   |  |   |  |   |   |

**Cluster 4 1650 - 1800 Definite.** We recovered 1,738 sherds that were produced between 1650 and 1800.

| Country | Region | Sub-Region | Basin | Bottle | Bowl | Box | Covered Box | Cup | Dish | Incense Burner | Jar | Lamp | Lid | Pot | Potiche | Spoon | Spoon Tray | Stem Cup | Tray | Vase | Unknown |
|---------|--------|------------|-------|--------|------|-----|-------------|-----|------|----------------|-----|------|-----|-----|---------|-------|------------|----------|------|------|---------|
| Burma   | Mon    | Martaban   |       |        | 9    |     |             |     |      |                |     |      |     |     |         |       |            |          |      |      |         |
| Burma   | Mon    | Martaban   |       |        |      |     |             |     | 2    |                |     |      |     |     |         |       |            |          |      |      |         |
| Burma   | Mon    | Martaban   |       |        |      |     |             |     |      |                | 311 |      |     |     |         |       |            |          |      |      |         |
| Burma   | Mon    | Martaban   |       |        |      |     |             |     |      |                |     | 1    |     |     |         |       |            |          |      |      |         |
| Burma   |        |            | 8     |        |      |     |             |     |      |                |     |      |     |     |         |       |            |          |      |      |         |
| Burma   |        |            |       | 1      |      |     |             |     |      |                |     |      |     |     |         |       |            |          |      |      |         |
| Burma   |        |            |       |        | 25   |     |             |     |      |                |     |      |     |     |         |       |            |          |      |      |         |
| Burma   |        |            |       |        |      |     |             |     | 47   |                |     |      |     |     |         |       |            |          |      |      |         |
| Burma   |        |            |       |        |      |     |             |     |      |                |     |      | 1   |     |         |       |            |          |      |      |         |
| Burma   |        |            |       |        |      |     |             |     |      |                |     |      |     | 1   |         |       |            |          |      |      |         |
| China   | Fujian | Dehua      |       | 1      |      |     |             |     |      |                |     |      |     |     |         |       |            |          |      |      |         |
| China   | Fujian | Dehua      |       |        | 217  |     |             |     |      |                |     |      |     |     |         |       |            |          |      |      |         |
| China   | Fujian | Dehua      |       |        |      | 5   |             |     |      |                |     |      |     |     |         |       |            |          |      |      |         |
| China   | Fujian | Dehua      |       |        |      |     | 6           |     |      |                |     |      |     |     |         |       |            |          |      |      |         |
| China   | Fujian | Dehua      |       |        |      |     |             |     |      |                | 5   |      |     |     |         |       |            |          |      |      |         |
| China   | Fujian | Dehua      |       |        |      |     |             | 6   |      |                |     |      |     |     |         |       |            |          |      |      |         |
| China   | Fujian | Dehua      |       |        |      |     |             |     | 34   |                |     |      |     |     |         |       |            |          |      |      |         |
| China   | Fujian | Dehua      |       |        |      |     |             |     |      |                |     |      | 7   |     |         |       |            |          |      |      |         |
| China   | Fujian | Dehua      |       |        |      |     |             |     |      |                |     |      |     | 1   |         |       |            |          |      |      |         |
| China   | Fujian | Dehua      |       |        |      |     |             |     |      |                |     |      |     |     | 1       |       |            |          |      |      |         |
| China   | Fujian | Dehua      |       |        |      |     |             |     |      |                |     |      |     |     |         |       |            |          |      | 3    |         |
| China   | Fujian | Zhangzhou  |       |        | 442  |     |             |     |      |                |     |      |     |     |         |       |            |          |      |      |         |
| China   | Fujian | Zhangzhou  |       |        |      |     |             | 1   |      |                |     |      |     |     |         |       |            |          |      |      |         |
| China   | Fujian | Zhangzhou  |       |        |      |     |             |     | 260  |                |     |      |     |     |         |       |            |          |      |      |         |

|       |           |            |   |   |     |   |   |    |    |    |   |   |   |   |  |   |  |    |   |
|-------|-----------|------------|---|---|-----|---|---|----|----|----|---|---|---|---|--|---|--|----|---|
| China | Fujian    | Zhangzhou  |   |   |     |   |   |    |    |    |   |   | 4 |   |  |   |  |    |   |
| China | Fujian    | Zhangzhou  |   |   |     |   |   |    |    |    |   |   |   |   |  |   |  | 1  |   |
| China | Fujian    | Zhangzhou  |   |   |     |   |   |    |    |    |   |   |   |   |  |   |  |    | 3 |
| China | Fujian    |            | 1 |   |     |   |   |    |    |    |   |   |   |   |  |   |  |    |   |
| China | Fujian    |            |   |   | 383 |   |   |    |    |    |   |   |   |   |  |   |  |    |   |
| China | Fujian    |            |   |   |     | 1 |   |    |    |    |   |   |   |   |  |   |  |    |   |
| China | Fujian    |            |   |   |     |   | 9 |    |    |    |   |   |   |   |  |   |  |    |   |
| China | Fujian    |            |   |   |     |   |   | 11 |    |    |   |   |   |   |  |   |  |    |   |
| China | Fujian    |            |   |   |     |   |   |    |    | 39 |   |   |   |   |  |   |  |    |   |
| China | Fujian    |            |   |   |     |   |   |    |    |    |   |   |   |   |  |   |  |    | 2 |
| China | Fujian    |            |   |   |     |   |   |    |    |    |   |   |   | 2 |  |   |  |    |   |
| China | Guangdong |            |   |   | 6   |   |   |    |    |    |   |   |   |   |  |   |  |    |   |
| China | Guangdong |            |   |   |     |   |   |    |    | 3  |   |   |   |   |  |   |  |    |   |
| China | Jiangxi   | Jingdezhen |   | 3 |     |   |   |    |    |    |   |   |   |   |  |   |  |    |   |
| China | Jiangxi   | Jingdezhen |   |   | 164 |   |   |    |    |    |   |   |   |   |  |   |  |    |   |
| China | Jiangxi   | Jingdezhen |   |   |     | 1 |   |    |    |    |   |   |   |   |  |   |  |    |   |
| China | Jiangxi   | Jingdezhen |   |   |     |   |   |    |    |    | 9 |   |   |   |  |   |  |    |   |
| China | Jiangxi   | Jingdezhen |   |   |     |   | 1 |    |    |    |   |   |   |   |  |   |  |    |   |
| China | Jiangxi   | Jingdezhen |   |   |     |   |   |    |    | 7  |   |   |   |   |  |   |  |    |   |
| China | Jiangxi   | Jingdezhen |   |   |     |   |   | 22 |    |    |   |   |   |   |  |   |  |    |   |
| China | Jiangxi   | Jingdezhen |   |   |     |   |   |    | 17 |    |   |   |   |   |  |   |  |    |   |
| China | Jiangxi   | Jingdezhen |   |   |     |   |   |    |    |    |   |   |   |   |  |   |  | 1  |   |
| China | Jiangxi   | Jingdezhen |   |   |     |   |   |    |    |    |   |   |   |   |  |   |  | 10 |   |
| China | Jiangxi   | Jingdezhen |   |   |     |   |   |    |    |    |   | 2 |   |   |  |   |  |    |   |
| China | Jiangxi   | Jingdezhen |   |   |     |   |   |    |    |    |   |   |   | 1 |  |   |  |    |   |
| China | Jiangxi   | Jingdezhen |   |   |     |   |   |    |    |    |   |   |   |   |  | 1 |  |    |   |

|          |           |        |  |    |   |  |  |     |   |   |   |   |  |  |  |  |  |  |  |   |
|----------|-----------|--------|--|----|---|--|--|-----|---|---|---|---|--|--|--|--|--|--|--|---|
| Japan    | Hizen     |        |  |    |   |  |  | 1   |   |   |   |   |  |  |  |  |  |  |  |   |
| Japan    | Hizen     |        |  | 23 |   |  |  |     |   |   |   |   |  |  |  |  |  |  |  |   |
| Japan    | Hizen     |        |  |    |   |  |  |     |   |   | 4 |   |  |  |  |  |  |  |  |   |
| Japan    | Hizen     |        |  |    | 2 |  |  |     |   |   |   |   |  |  |  |  |  |  |  |   |
| Japan    | Hizen     |        |  |    |   |  |  | 291 |   |   |   |   |  |  |  |  |  |  |  |   |
| Japan    | Hizen     |        |  |    |   |  |  |     | 1 |   |   |   |  |  |  |  |  |  |  |   |
| Japan    | Hizen     |        |  |    |   |  |  |     |   | 5 |   |   |  |  |  |  |  |  |  |   |
| Japan    | Hizen     |        |  |    |   |  |  |     |   |   |   | 6 |  |  |  |  |  |  |  |   |
| Japan    | Hizen     |        |  |    |   |  |  |     |   |   |   |   |  |  |  |  |  |  |  | 3 |
| Thailand |           |        |  | 4  |   |  |  |     |   |   |   |   |  |  |  |  |  |  |  |   |
| Thailand |           |        |  |    |   |  |  | 1   |   |   |   |   |  |  |  |  |  |  |  |   |
| Vietnam  | Hai Duong | Hop Le |  | 42 |   |  |  |     |   |   |   |   |  |  |  |  |  |  |  |   |
| Vietnam  | Hai Duong | Hop Le |  |    |   |  |  | 5   |   |   |   |   |  |  |  |  |  |  |  |   |

**Cluster 4 1650 - 1800 Possible.** We recovered 2,487 sherds that might have been produced between 1650 and 1800.

### CLUSTER 5 TRADE CERAMICS

| Country  | Region    | Sub-Region | Basin | Bowl | Jar | Jarlet | Kendi | Unknown |
|----------|-----------|------------|-------|------|-----|--------|-------|---------|
| China    | Fujian    | Minnan     |       | 1    |     |        |       |         |
| China    | Fujian    | Quanzhou   |       | 1    |     |        |       |         |
| China    | Fujian    |            | 2     |      |     |        |       |         |
| China    | Fujian    |            |       | 46   |     |        |       |         |
| China    | Fujian    |            |       |      | 16  |        |       |         |
| China    | Fujian    |            |       |      |     | 2      |       |         |
| China    | Fujian    |            |       |      |     |        |       | 1       |
| China    | Guangdong |            |       | 3    |     |        |       |         |
| China    | Guangdong |            |       |      | 1   |        |       |         |
| China    | Guangxi   |            |       |      | 2   |        |       |         |
| China    | Zhejiang  | Longquan   |       | 21   |     |        |       |         |
| China    | Shannxi   | Yaozhou    |       | 1    |     |        |       |         |
| China    |           |            |       | 9    |     |        |       |         |
| China    |           |            |       |      | 17  |        |       |         |
| China    |           |            |       |      |     | 1      |       |         |
| Thailand |           |            |       |      |     |        | 1     |         |

**Cluster 5 Pre-1400 Definite.** We recovered 125 sherds that were produced prior to 1400.

| Country | Region | Sub-Region | Basin | Bowl | Jar | Jarlet | Kendi | Unknown |
|---------|--------|------------|-------|------|-----|--------|-------|---------|
| China   | Fujian | Minnan     |       | 1    |     |        |       |         |
| China   | Fujian | Quanzhou   |       | 1    |     |        |       |         |
| China   | Fujian |            | 2     |      |     |        |       |         |

|          |           |          |   |    |    |   |   |   |
|----------|-----------|----------|---|----|----|---|---|---|
| China    | Fujian    |          |   | 50 |    |   |   |   |
| China    | Fujian    |          |   |    | 21 |   |   |   |
| China    | Fujian    |          |   |    |    | 2 |   |   |
| China    | Fujian    |          |   |    |    |   |   | 1 |
| China    | Guangdong |          |   | 3  |    |   |   |   |
| China    | Guangdong |          |   |    | 1  |   |   |   |
| China    | Guangxi   |          |   |    | 2  |   |   |   |
| China    | Zhejiang  | Longquan |   | 39 |    |   |   |   |
| China    | Zhejiang  | Longquan |   |    |    | 1 |   |   |
| China    | Shannxi   | Yaozhou  |   | 1  |    |   |   |   |
| China    |           |          |   | 9  |    |   |   |   |
| China    |           |          |   |    | 18 |   |   |   |
| China    |           |          |   |    |    | 1 |   |   |
| China    |           |          | 1 |    |    |   |   |   |
| Thailand |           |          |   |    |    |   | 1 |   |

**Cluster 5 Pre-1400 Possible.** We recovered 155 sherds that might have been produced prior to 1400.

| Country  | Region    | Sub-Region | Basin | Bowl | Jar | Jarlet |
|----------|-----------|------------|-------|------|-----|--------|
| China    | Fujian    |            |       | 7    |     |        |
| China    | Fujian    |            |       |      | 5   |        |
| China    | Guangdong |            |       | 1    |     |        |
| China    | Zhejiang  | Longquan   |       | 19   |     |        |
| China    |           |            |       |      | 3   |        |
| China    |           |            | 1     |      |     |        |
| Thailand |           |            |       | 1    |     |        |



**Cluster 5 1400 – 1450 Possible.** There were no sherds in Cluster 5 that were definitely produced between 1400 and 1450. We recovered 37 sherds that might have been produced between 1400 and 1450.

| Country  | Region   | Sub-Region | Bottle | Bowl | Jar |
|----------|----------|------------|--------|------|-----|
| China    | Zhejiang | Longquan   |        | 1    |     |
| Thailand |          |            |        |      | 2   |
| Thailand |          |            |        | 2    |     |

**Cluster 5 1450 – 1550 Definite.** We recovered 5 sherds that were produced between 1450 and 1550 from this Cluster.

| Country  | Region    | Sub-Region | Basin | Bottle | Bowl | Covered Box | Jar |
|----------|-----------|------------|-------|--------|------|-------------|-----|
| China    | Fujian    |            |       |        | 14   |             |     |
| China    | Fujian    |            |       |        |      |             | 5   |
| China    | Guangdong |            |       |        | 1    |             |     |
| China    | Jiangxi   | Jingdezhen |       |        | 3    |             |     |
| China    | Zhejiang  | Longquan   |       |        | 1    |             |     |
| China    |           |            |       |        | 1    |             |     |
| China    |           |            |       |        |      |             | 3   |
| China    |           |            | 1     |        |      |             |     |
| Thailand |           |            |       | 1      |      |             |     |
| Thailand |           |            |       |        | 3    |             |     |
| Thailand |           |            |       |        |      | 1           |     |
| Thailand |           |            |       |        |      |             | 1   |

**Cluster 5 1450 – 1550 Possible.** We recovered 35 sherds that might have been produced between 1450 and 1550

| Country | Region  | Sub-Region | Bowl | Cup | Dish | Lid |
|---------|---------|------------|------|-----|------|-----|
| China   | Fujian  | Zhangzhou  | 1    |     |      |     |
| China   | Fujian  |            | 57   |     |      |     |
| China   | Fujian  |            |      |     | 1    |     |
| China   | Fujian  |            |      | 1   |      |     |
| China   | Jiangxi | Jingdezhen | 3    |     |      |     |
| China   | Jiangxi | Jingdezhen |      |     |      | 1   |
| China   | Jiangxi | Jingdezhen |      |     | 1    |     |

**Cluster 5 1550 – 1650 Definite.** We recovered 65 sherds that were produced between 1550 and 1650.

| Country | Region  | Sub-Region | Basin | Bowl | Covered Box | Cup | Dish | Jar | Lid |
|---------|---------|------------|-------|------|-------------|-----|------|-----|-----|
| Burma   | Mon     | Martaban   |       | 5    |             |     |      |     |     |
| Burma   | Mon     | Martaban   |       |      |             |     |      | 55  |     |
| China   | Fujian  | Zhangzhou  |       | 1    |             |     |      |     |     |
| China   | Fujian  |            |       | 169  |             |     |      |     |     |
| China   | Fujian  |            |       |      |             |     | 2    |     |     |
| China   | Fujian  |            |       |      |             |     | 3    |     |     |
| China   | Fujian  |            |       |      |             |     |      | 1   |     |
| China   | Fujian  |            | 2     |      |             |     |      |     |     |
| China   | Fujian  |            |       |      |             | 1   |      |     |     |
| China   | Jiangxi | Jingdezhen |       | 14   |             |     |      |     |     |
| China   | Jiangxi | Jingdezhen |       |      |             | 1   |      |     |     |
| China   | Jiangxi | Jingdezhen |       |      |             |     |      |     | 1   |
| China   | Jiangxi | Jingdezhen |       |      |             |     | 3    |     |     |
| China   |         |            |       | 1    |             |     |      |     |     |

|          |       |  |   |   |  |  |  |   |  |
|----------|-------|--|---|---|--|--|--|---|--|
| China    |       |  |   |   |  |  |  | 5 |  |
| Japan    | Hizen |  | 3 |   |  |  |  |   |  |
| Thailand |       |  |   | 1 |  |  |  |   |  |

**Cluster 5 1550 – 1650 Possible.** We recovered 268 sherds that might have been produced between 1550 and 1650.

| Country | Region  | Sub-Region | Bowl | Covered Box | Cup | Dish | Jar | Lid | Plate | Saucer | Spoon | Vase | Unknown |
|---------|---------|------------|------|-------------|-----|------|-----|-----|-------|--------|-------|------|---------|
| Burma   | Mon     | Martaban   | 4    |             |     |      |     |     |       |        |       |      |         |
| China   | Fujian  |            | 525  |             |     |      |     |     |       |        |       |      |         |
| China   | Fujian  |            |      |             |     |      |     | 3   |       |        |       |      |         |
| China   | Fujian  |            |      | 5           |     |      |     |     |       |        |       |      |         |
| China   | Fujian  |            |      |             |     | 2    |     |     |       |        |       |      |         |
| China   | Fujian  |            |      |             |     |      | 6   |     |       |        |       |      |         |
| China   | Fujian  |            |      |             |     |      |     |     |       |        |       |      | 2       |
| China   | Fujian  |            |      |             | 2   |      |     |     |       |        |       |      |         |
| China   | Fujian  |            |      |             |     |      |     |     |       |        | 1     |      |         |
| China   | Fujian  |            |      |             |     |      |     |     |       |        |       | 2    |         |
| China   | Jiangxi | Jingdezhen | 18   |             |     |      |     |     |       |        |       |      |         |
| China   | Jiangxi | Jingdezhen |      | 1           |     |      |     |     |       |        |       |      |         |
| China   | Jiangxi | Jingdezhen |      |             |     |      |     |     | 1     |        |       |      |         |
| China   | Jiangxi | Jingdezhen |      |             |     |      |     |     |       | 1      |       |      |         |
| China   | Jiangxi | Jingdezhen |      |             | 2   |      |     |     |       |        |       |      |         |
| China   |         |            | 1    |             |     |      |     |     |       |        |       |      |         |
| China   |         |            |      |             |     |      | 2   |     |       |        |       |      |         |
| Japan   | Hizen   |            | 28   |             |     |      |     |     |       |        |       |      |         |
| Japan   | Hizen   |            |      |             | 2   |      |     |     |       |        |       |      |         |

|       |       |  |  |  |  |    |  |  |   |  |  |  |  |
|-------|-------|--|--|--|--|----|--|--|---|--|--|--|--|
| Japan | Hizen |  |  |  |  | 20 |  |  |   |  |  |  |  |
| Japan | Hizen |  |  |  |  |    |  |  | 7 |  |  |  |  |

**Cluster 5 1650 – 1800 Definite.** We recovered 635 sherds that were produced between 1650 and 1800.

| Country | Region  | Sub-Region | Basin | Bowl | Covered Box | Cup | Dish | Jar | Lid | Plate | Spoon | Vase | Unknown |
|---------|---------|------------|-------|------|-------------|-----|------|-----|-----|-------|-------|------|---------|
| Burma   | Mon     | Martaban   |       | 9    |             |     |      |     |     |       |       |      |         |
| Burma   | Mon     | Martaban   |       |      |             |     |      | 55  |     |       |       |      |         |
| China   | Fujian  |            |       | 875  |             |     |      |     |     |       |       |      |         |
| China   | Fujian  |            |       |      |             |     |      |     |     |       | 3     |      |         |
| China   | Fujian  |            |       |      |             |     |      |     | 3   |       |       |      |         |
| China   | Fujian  |            |       |      | 8           |     |      |     |     |       |       |      |         |
| China   | Fujian  |            |       |      |             |     | 14   |     |     |       |       |      |         |
| China   | Fujian  |            |       |      |             |     |      | 7   |     |       |       |      |         |
| China   | Fujian  |            | 2     |      |             |     |      |     |     |       |       |      |         |
| China   | Fujian  |            |       |      |             |     |      |     |     |       |       |      | 2       |
| China   | Fujian  |            |       |      |             | 2   |      |     |     |       |       |      |         |
| China   | Fujian  |            |       |      |             |     |      |     |     |       |       | 2    |         |
| China   | Jiangxi | Jingdezhen |       | 27   |             |     |      |     |     |       |       |      |         |
| China   | Jiangxi | Jingdezhen |       |      | 2           |     |      |     |     |       |       |      |         |
| China   | Jiangxi | Jingdezhen |       |      |             |     |      |     |     | 1     |       |      |         |
| China   | Jiangxi | Jingdezhen |       |      |             |     |      |     |     |       |       |      | 1       |
| China   | Jiangxi | Jingdezhen |       |      |             |     | 3    |     |     |       |       |      |         |
| China   | Jiangxi | Jingdezhen |       |      |             | 2   |      |     |     |       |       |      |         |
| China   |         |            |       | 3    |             |     |      |     |     |       |       |      |         |
| China   |         |            |       |      |             |     |      | 10  |     |       |       |      |         |

|       |       |  |  |    |  |   |    |  |   |  |  |  |  |
|-------|-------|--|--|----|--|---|----|--|---|--|--|--|--|
| Japan | Hizen |  |  | 34 |  |   |    |  |   |  |  |  |  |
| Japan | Hizen |  |  |    |  | 2 |    |  |   |  |  |  |  |
| Japan | Hizen |  |  |    |  |   | 21 |  |   |  |  |  |  |
| Japan | Hizen |  |  |    |  |   |    |  | 7 |  |  |  |  |

**Cluster 5 1650 – 1800 Possible.** We recovered 1095 sherds that might have been produced between 1650 and 1800.

### CLUSTER 6 TRADE CERAMICS DATA

| Country | Region    | Sub-Region | Bowl | Dish | Jar | Jarlet | Lid |
|---------|-----------|------------|------|------|-----|--------|-----|
| China   | Fujian    | Cizao      |      |      | 5   |        |     |
| China   | Fujian    | Tongan     | 5    |      |     |        |     |
| China   | Fujian    | Tongan     |      | 1    |     |        |     |
| China   | Fujian    | Zhangzhou  |      | 1    |     |        |     |
| China   | Guangdong |            |      |      | 44  |        |     |
| China   | Guangdong |            |      |      |     |        | 1   |
| China   | Zhejiang  | Longquan   | 4    |      |     |        |     |
| China   | Zhejiang  | Longquan   |      | 8    |     |        |     |
| China   | Zhejiang  | Longquan   |      |      | 1   |        |     |
| China   | Zhejiang  | Longquan   |      |      |     | 1      |     |

**Cluster 6 Pre-1400 Definite.** This table includes a total of 71 sherds that date prior to 1400 (no overlapping sherds).

| Country  | Region    | Sub-Region  | Dish | Jar |
|----------|-----------|-------------|------|-----|
| Burma    | Mon       | Martaban    | 1    |     |
| Burma    | Mon       | Martaban    |      | 9   |
| Thailand | Sukhothai | Sawankhalok | 2    |     |

**Cluster 6 1400 - 1450 Possible.** No sherds were recovered from this Cluster that were definitely produced between 1400 and 1450. We recovered 12 sherds that could possibly have been produced during this period.

| Country | Region | Sub-Region | Bottle | Bowl | Covered Box | Dish | Jar | Lid |
|---------|--------|------------|--------|------|-------------|------|-----|-----|
| Burma   | Mon    | Martaban   |        | 1    |             |      |     |     |

|          |           |             |   |   |   |    |   |   |
|----------|-----------|-------------|---|---|---|----|---|---|
| Burma    | Mon       | Martaban    |   |   |   | 14 |   |   |
| Burma    | Mon       | Martaban    |   |   |   |    | 1 |   |
| Burma    | Yanggong  | Twante      |   | 1 |   |    |   |   |
| China    | Jiangxi   | Jingdezhen  |   | 4 |   |    |   |   |
| China    | Jiangxi   | Jingdezhen  |   |   |   | 12 |   |   |
| China    | Jiangxi   | Jingdezhen  |   |   |   |    | 3 |   |
| Thailand | Sukhothai | Sawankhalok | 1 |   |   |    |   |   |
| Thailand | Sukhothai | Sawankhalok |   |   | 1 |    |   |   |
| Thailand | Sukhothai | Sawankhalok |   |   |   | 1  |   |   |
| Thailand | Sukhothai | Sawankhalok |   |   |   |    |   | 1 |
| Thailand | Sukhothai | Sukhothai   |   | 1 |   |    |   |   |
| Thailand | Sukhothai | Sukhothai   |   |   |   | 4  |   |   |

**Cluster 6 1450 - 1550 Definite.** We recovered 45 sherds that were produced between 1450 and 1550.

| Country  | Region    | Sub-Region  | Bottle | Bowl | Covered Box | Dish | Jar | Lid | Potiche |
|----------|-----------|-------------|--------|------|-------------|------|-----|-----|---------|
| Burma    | Mon       | Martaban    |        | 1    |             |      |     |     |         |
| Burma    | Mon       | Martaban    |        |      |             | 15   |     |     |         |
| Burma    | Mon       | Martaban    |        |      |             |      | 10  |     |         |
| Burma    | Yanggong  | Twante      |        | 1    |             |      |     |     |         |
| Burma    |           |             |        | 4    |             |      |     |     |         |
| China    | Jiangxi   | Jingdezhen  |        | 4    |             |      |     |     |         |
| China    | Jiangxi   | Jingdezhen  |        |      |             | 12   |     |     |         |
| China    | Jiangxi   | Jingdezhen  |        |      |             |      | 3   |     |         |
| Thailand | Sukhothai | Sawankhalok | 1      |      |             |      |     |     |         |
| Thailand | Sukhothai | Sawankhalok |        | 1    |             |      |     |     |         |
| Thailand | Sukhothai | Sawankhalok |        |      | 1           |      |     |     |         |

|          |           |             |  |   |  |   |   |   |   |  |
|----------|-----------|-------------|--|---|--|---|---|---|---|--|
| Thailand | Sukhothai | Sawankhalok |  |   |  | 3 |   |   |   |  |
| Thailand | Sukhothai | Sawankhalok |  |   |  |   | 1 |   |   |  |
| Thailand | Sukhothai | Sawankhalok |  |   |  |   |   | 1 |   |  |
| Thailand | Sukhothai | Sawankhalok |  |   |  |   |   |   | 1 |  |
| Thailand | Sukhothai | Sukhothai   |  | 1 |  |   |   |   |   |  |
| Thailand | Sukhothai | Sukhothai   |  |   |  | 4 |   |   |   |  |

**Cluster 6 1450 - 1550 Possible.** We recovered 64 sherds that could have possibly been produced between 1450 and 1550.

| Country | Region | Sub-Region | Bottle | Bowl | Covered Box | Cup | Dish | Jar | Lid | Potiche | Spoon | Stem Cup | Unknown |
|---------|--------|------------|--------|------|-------------|-----|------|-----|-----|---------|-------|----------|---------|
| Burma   | Mon    | Martaban   |        | 3    |             |     |      |     |     |         |       |          |         |
| Burma   | Mon    | Martaban   |        |      |             |     | 9    |     |     |         |       |          |         |
| Burma   | Mon    | Martaban   |        |      |             |     |      | 50  |     |         |       |          |         |
| Burma   |        |            |        | 2    |             |     |      |     |     |         |       |          |         |
| Burma   |        |            |        |      |             |     | 1    |     |     |         |       |          |         |
| Burma   |        |            |        |      |             |     |      | 1   |     |         |       |          |         |
| China   | Fujian | Dehua      |        | 7    |             |     |      |     |     |         |       |          |         |
| China   | Fujian | Shaowu     |        |      |             |     |      | 2   |     |         |       |          |         |
| China   | Fujian | Zhangzhou  |        | 365  |             |     |      |     |     |         |       |          |         |
| China   | Fujian | Zhangzhou  |        |      | 3           |     |      |     |     |         |       |          |         |
| China   | Fujian | Zhangzhou  |        |      |             | 1   |      |     |     |         |       |          |         |
| China   | Fujian | Zhangzhou  |        |      |             |     | 592  |     |     |         |       |          |         |
| China   | Fujian | Zhangzhou  |        |      |             |     |      | 1   |     |         |       |          |         |
| China   | Fujian | Zhangzhou  |        |      |             |     |      |     | 2   |         |       |          |         |
| China   | Fujian | Zhangzhou  |        |      |             |     |      |     |     | 2       |       |          |         |
| China   | Fujian | Zhangzhou  |        |      |             |     |      |     |     |         | 1     |          |         |





|       |           |            |  |   |     |   |   |     |   |   |   |   |   |  |   |  |
|-------|-----------|------------|--|---|-----|---|---|-----|---|---|---|---|---|--|---|--|
| China | Fujian    | Dehua      |  |   |     | 2 |   |     |   |   |   |   |   |  |   |  |
| China | Fujian    | Dehua      |  |   |     |   |   |     |   |   | 1 |   |   |  |   |  |
| China | Fujian    | Dehua      |  |   |     |   |   |     |   |   | 4 |   |   |  |   |  |
| China | Fujian    | Dehua      |  |   |     |   |   |     |   |   |   | 1 |   |  |   |  |
| China | Fujian    | Shaowu     |  |   |     |   |   |     | 6 |   |   |   |   |  |   |  |
| China | Fujian    | Zhangzhou  |  |   | 376 |   |   |     |   |   |   |   |   |  |   |  |
| China | Fujian    | Zhangzhou  |  |   |     | 3 |   |     |   |   |   |   |   |  |   |  |
| China | Fujian    | Zhangzhou  |  |   |     |   | 1 |     |   |   |   |   |   |  |   |  |
| China | Fujian    | Zhangzhou  |  |   |     |   |   | 596 |   |   |   |   |   |  |   |  |
| China | Fujian    | Zhangzhou  |  |   |     |   |   |     | 1 |   |   |   |   |  |   |  |
| China | Fujian    | Zhangzhou  |  |   |     |   |   |     |   | 2 |   |   |   |  |   |  |
| China | Fujian    | Zhangzhou  |  |   |     |   |   |     |   |   | 2 |   |   |  |   |  |
| China | Fujian    | Zhangzhou  |  |   |     |   |   |     |   |   |   | 1 |   |  |   |  |
| China | Fujian    | Zhangzhou  |  |   |     |   |   |     |   |   |   |   | 1 |  |   |  |
| China | Fujian    | Zhangzhou  |  |   |     |   |   |     |   |   |   |   |   |  | 1 |  |
| China | Fujian    |            |  |   | 1   |   |   |     |   |   |   |   |   |  |   |  |
| China | Guangdong |            |  |   |     |   |   |     | 4 |   |   |   |   |  |   |  |
| China | Guangdong |            |  |   |     |   |   |     |   | 2 |   |   |   |  |   |  |
| China | Jiangxi   | Jingdezhen |  | 1 |     |   |   |     |   |   |   |   |   |  |   |  |
| China | Jiangxi   | Jingdezhen |  |   | 84  |   |   |     |   |   |   |   |   |  |   |  |
| China | Jiangxi   | Jingdezhen |  |   |     | 1 |   |     |   |   |   |   |   |  |   |  |
| China | Jiangxi   | Jingdezhen |  |   |     |   | 1 |     |   |   |   |   |   |  |   |  |
| China | Jiangxi   | Jingdezhen |  |   |     |   |   | 24  |   |   |   |   |   |  |   |  |
| China | Jiangxi   | Jingdezhen |  |   |     |   |   |     |   | 3 |   |   |   |  |   |  |
| China | Jiangxi   | Jingdezhen |  |   |     |   |   |     |   |   | 5 |   |   |  |   |  |
| China | Jiangxi   | Jingdezhen |  |   |     |   |   |     |   |   |   |   | 1 |  |   |  |

|          |           |             |  |  |   |  |  |   |  |   |  |   |  |  |
|----------|-----------|-------------|--|--|---|--|--|---|--|---|--|---|--|--|
| China    | Zhejiang  | Longquan    |  |  |   |  |  | 1 |  |   |  |   |  |  |
| Japan    | Hizen     |             |  |  | 2 |  |  |   |  |   |  |   |  |  |
| Japan    | Hizen     |             |  |  |   |  |  | 2 |  |   |  |   |  |  |
| Thailand | Sukhothai | Sawankhalok |  |  | 1 |  |  |   |  |   |  |   |  |  |
| Thailand | Sukhothai | Sawankhalok |  |  |   |  |  |   |  | 1 |  |   |  |  |
| Thailand | Sukhothai | Sawankhalok |  |  |   |  |  |   |  |   |  | 1 |  |  |

**Cluster 6 1550 - 1650 Possible.** We recovered 1384 sherds that could have been produced between 1550 and 1650.

| Country | Region    | Sub-Region | Bottle | Bowl | Cavetto | Covered Box | Cup | Dish | Jar | Lid | Potiche |
|---------|-----------|------------|--------|------|---------|-------------|-----|------|-----|-----|---------|
| Burma   | Mon       | Martaban   |        | 3    |         |             |     |      |     |     |         |
| Burma   | Mon       | Martaban   |        |      |         |             |     | 26   |     |     |         |
| Burma   | Mon       | Martaban   |        |      |         |             |     |      | 2   |     |         |
| China   | Fujian    | Anxi       |        | 6    |         |             |     |      |     |     |         |
| China   | Fujian    | Dehua      |        | 123  |         |             |     |      |     |     |         |
| China   | Fujian    | Dehua      |        |      |         |             | 1   |      |     |     |         |
| China   | Fujian    | Dehua      |        |      |         |             |     | 26   |     |     |         |
| China   | Fujian    | Dehua      |        |      | 1       |             |     |      |     |     |         |
| China   | Fujian    | Shaowu     |        |      |         |             |     |      | 1   |     |         |
| China   | Fujian    | Zhangzhou  |        | 932  |         |             |     |      |     |     |         |
| China   | Fujian    | Zhangzhou  |        |      |         |             |     | 272  |     |     |         |
| China   | Fujian    | Zhangzhou  |        |      |         |             |     |      |     | 4   |         |
| China   | Fujian    | Zhangzhou  |        |      |         |             |     |      |     |     | 4       |
| China   | Fujian    | Zhangzhou  |        |      |         |             |     |      | 1   |     |         |
| China   | Fujian    |            |        | 21   |         |             |     |      |     |     |         |
| China   | Fujian    |            |        |      |         |             |     | 1    |     |     |         |
| China   | Guangdong |            |        |      |         |             |     |      | 2   |     |         |

|         |           |            |   |     |  |   |   |     |  |    |  |  |    |  |
|---------|-----------|------------|---|-----|--|---|---|-----|--|----|--|--|----|--|
| China   | Jiangxi   | Jingdezhen |   | 52  |  |   |   |     |  |    |  |  |    |  |
| China   | Jiangxi   | Jingdezhen |   |     |  | 1 |   |     |  |    |  |  |    |  |
| China   | Jiangxi   | Jingdezhen |   |     |  |   | 2 |     |  |    |  |  |    |  |
| China   | Jiangxi   | Jingdezhen |   |     |  |   |   | 18  |  |    |  |  |    |  |
| China   | Jiangxi   | Jingdezhen |   |     |  |   |   |     |  | 27 |  |  |    |  |
| China   | Jiangxi   | Jingdezhen |   |     |  |   |   |     |  |    |  |  | 20 |  |
| Japan   | Hizen     |            | 1 |     |  |   |   |     |  |    |  |  |    |  |
| Japan   | Hizen     |            |   | 28  |  |   |   |     |  |    |  |  |    |  |
| Japan   | Hizen     |            |   |     |  |   |   | 304 |  |    |  |  |    |  |
| Vietnam | Hai Duong | Hop Le     |   | 202 |  |   |   |     |  |    |  |  |    |  |

**Cluster 6 1650 - 1800 Definite.** We recovered 2081 sherds that were produced between 1650 and 1800.

| Country | Region | Sub-Region | Basin | Bottle | Bowl | Cavetto | Covered Box | Cup | Dish | Handle | Jar | Lid | Potiche | Spoon | Unknown |
|---------|--------|------------|-------|--------|------|---------|-------------|-----|------|--------|-----|-----|---------|-------|---------|
| Burma   | Mon    | Martaban   | 1     |        |      |         |             |     |      |        |     |     |         |       |         |
| Burma   | Mon    | Martaban   |       |        | 5    |         |             |     |      |        |     |     |         |       |         |
| Burma   | Mon    | Martaban   |       |        |      |         |             |     | 40   |        |     |     |         |       |         |
| Burma   | Mon    | Martaban   |       |        |      |         |             |     |      | 1      |     |     |         |       |         |
| Burma   | Mon    | Martaban   |       |        |      |         |             |     |      |        | 143 |     |         |       |         |
| Burma   | Mon    | Martaban   |       |        |      |         |             |     |      |        |     | 1   |         |       |         |
| Burma   | Mon    | Martaban   |       |        |      |         |             |     |      |        |     |     |         |       | 1       |
| Burma   |        |            |       |        |      |         |             |     | 1    |        |     |     |         |       |         |
| Burma   |        |            |       |        |      |         |             |     |      |        | 3   |     |         |       |         |
| China   | Fujian | Anxi       |       |        | 6    |         |             |     |      |        |     |     |         |       |         |
| China   | Fujian | Dehua      |       |        | 209  |         |             |     |      |        |     |     |         |       |         |
| China   | Fujian | Dehua      |       |        |      |         | 2           |     |      |        |     |     |         |       |         |

|       |           |            |  |  |      |   |  |   |     |  |   |    |    |   |   |
|-------|-----------|------------|--|--|------|---|--|---|-----|--|---|----|----|---|---|
| China | Fujian    | Dehua      |  |  |      |   |  | 1 |     |  |   |    |    |   |   |
| China | Fujian    | Dehua      |  |  |      |   |  |   | 79  |  |   |    |    |   |   |
| China | Fujian    | Dehua      |  |  |      |   |  |   |     |  |   | 6  |    |   |   |
| China | Fujian    | Dehua      |  |  |      |   |  |   |     |  |   |    | 4  |   |   |
| China | Fujian    | Dehua      |  |  |      |   |  |   |     |  |   |    |    | 1 |   |
| China | Fujian    | Dehua      |  |  |      | 1 |  |   |     |  |   |    |    |   |   |
| China | Fujian    | Shaowu     |  |  |      |   |  |   |     |  | 5 |    |    |   |   |
| China | Fujian    | Zhangzhou  |  |  | 1728 |   |  |   |     |  |   |    |    |   |   |
| China | Fujian    | Zhangzhou  |  |  |      |   |  |   | 383 |  |   |    |    |   |   |
| China | Fujian    | Zhangzhou  |  |  |      |   |  |   |     |  |   | 5  |    |   |   |
| China | Fujian    | Zhangzhou  |  |  |      |   |  |   |     |  |   |    | 7  |   |   |
| China | Fujian    | Zhangzhou  |  |  |      |   |  |   |     |  |   |    |    | 1 |   |
| China | Fujian    | Zhangzhou  |  |  |      |   |  |   |     |  | 1 |    |    |   |   |
| China | Fujian    | Zhangzhou  |  |  |      |   |  |   |     |  |   |    |    |   | 1 |
| China | Fujian    |            |  |  | 25   |   |  |   |     |  |   |    |    |   |   |
| China | Fujian    |            |  |  |      |   |  |   | 1   |  |   |    |    |   |   |
| China | Guangdong |            |  |  |      |   |  |   |     |  | 6 |    |    |   |   |
| China | Guangdong |            |  |  |      |   |  |   |     |  |   | 2  |    |   |   |
| China | Jiangsu   | Yixing     |  |  | 1    |   |  |   |     |  |   |    |    |   |   |
| China | Jiangxi   | Jingdezhen |  |  | 57   |   |  |   |     |  |   |    |    |   |   |
| China | Jiangxi   | Jingdezhen |  |  |      |   |  | 1 |     |  |   |    |    |   |   |
| China | Jiangxi   | Jingdezhen |  |  |      |   |  | 2 |     |  |   |    |    |   |   |
| China | Jiangxi   | Jingdezhen |  |  |      |   |  |   | 21  |  |   |    |    |   |   |
| China | Jiangxi   | Jingdezhen |  |  |      |   |  |   |     |  |   | 28 |    |   |   |
| China | Jiangxi   | Jingdezhen |  |  |      |   |  |   |     |  |   |    | 22 |   |   |
| China | Zhejiang  | Longquan   |  |  |      |   |  |   | 1   |  |   |    |    |   |   |

|         |           |            |  |   |     |  |  |  |     |  |  |  |  |  |  |
|---------|-----------|------------|--|---|-----|--|--|--|-----|--|--|--|--|--|--|
| Holland | Limburg   | Maastricht |  |   | 2   |  |  |  |     |  |  |  |  |  |  |
| Holland | Limburg   | Maastricht |  |   |     |  |  |  |     |  |  |  |  |  |  |
| Japan   | Hizen     |            |  | 1 |     |  |  |  |     |  |  |  |  |  |  |
| Japan   | Hizen     |            |  |   | 30  |  |  |  |     |  |  |  |  |  |  |
| Japan   | Hizen     |            |  |   |     |  |  |  | 306 |  |  |  |  |  |  |
| Vietnam | Hai Duong | Hop Le     |  |   | 203 |  |  |  |     |  |  |  |  |  |  |

**Cluster 6 1650 - 1800 Possible.** We recovered 3345 sherds that could have been produced between 1650 and 1800.

### CLUSTER 7 TRADE CERAMICS DATA

| Country | Region    | Sub-Region | Basin | Bowl | Brush Washer | Covered Box | Dish | Jar | Khadai |
|---------|-----------|------------|-------|------|--------------|-------------|------|-----|--------|
| China   | Fujian    | Cizao      |       |      |              |             |      | 10  |        |
| China   | Fujian    | Dehua      |       |      |              |             | 1    |     |        |
| China   | Fujian    | Tongan     |       | 54   |              |             |      |     |        |
| China   | Fujian    |            |       | 82   |              |             |      |     |        |
| China   | Fujian    |            |       |      |              | 2           |      |     |        |
| China   | Fujian    |            |       |      |              |             | 1    |     |        |
| China   | Fujian    |            |       |      |              |             |      | 15  |        |
| China   | Fujian    |            | 1     |      |              |             |      |     |        |
| China   | Guangdong | Guangzhou  | 10    |      |              |             |      |     |        |
| China   | Guangdong | Guangzhou  |       |      |              |             |      | 4   |        |
| China   | Guangdong |            |       |      |              |             |      | 4   |        |
| China   | Guangdong |            |       | 1    |              |             |      |     |        |
| China   | Zhejiang  | Longquan   |       | 13   |              |             |      |     |        |
| China   | Zhejiang  | Longquan   |       |      | 1            |             |      |     |        |
| China   | Zhejiang  | Longquan   |       |      |              |             | 8    |     |        |
| China   |           |            |       | 1    |              |             |      |     |        |
| China   |           |            |       |      |              |             |      | 11  |        |
| India   |           |            |       |      |              |             |      |     | 1      |

**Cluster 7 Pre-1400 Definite.** This table includes a total of 220 sherds that date prior to 1400.

| Country | Region | Sub-Region | Basin | Bowl | Brush Washer | Covered Box | Dish | Jar | Khadai | Vase |
|---------|--------|------------|-------|------|--------------|-------------|------|-----|--------|------|
| China   | Fujian | Cizao      |       |      |              |             |      | 10  |        |      |

|          |           |           |    |    |   |   |   |    |   |   |
|----------|-----------|-----------|----|----|---|---|---|----|---|---|
| China    | Fujian    | Dehua     |    |    |   |   | 1 |    |   |   |
| China    | Fujian    | Tongan    |    | 54 |   |   |   |    |   |   |
| China    | Fujian    |           |    | 80 |   |   |   |    |   |   |
| China    | Fujian    |           |    |    |   | 2 |   |    |   |   |
| China    | Fujian    |           |    |    |   |   | 5 |    |   |   |
| China    | Fujian    |           |    |    |   |   |   | 11 |   |   |
| China    | Fujian    |           | 1  |    |   |   |   |    |   |   |
| China    | Guangdong | Guangzhou | 10 |    |   |   |   |    |   |   |
| China    | Guangdong | Guangzhou |    |    |   |   |   | 4  |   |   |
| China    | Guangdong |           |    |    |   |   |   | 4  |   |   |
| China    | Guangdong |           | 1  |    |   |   |   |    |   |   |
| China    | Guangdong |           |    | 1  |   |   |   |    |   |   |
| China    | Henan     | Yuzhou    |    |    |   |   |   |    |   | 1 |
| China    | Zhejiang  | Longquan  |    | 26 |   |   |   |    |   |   |
| China    | Zhejiang  | Longquan  |    |    | 1 |   |   |    |   |   |
| China    | Zhejiang  | Longquan  |    |    |   |   | 8 |    |   |   |
| China    |           |           |    | 1  |   |   |   |    |   |   |
| China    |           |           | 1  |    |   |   |   |    |   |   |
| China    |           |           |    |    |   |   |   | 12 |   |   |
| Thailand |           |           |    | 6  |   |   |   |    |   |   |
| India    |           |           |    |    |   |   |   |    | 1 |   |

**Cluster 7 Pre-1400 Possible.** This table includes a total of 241 sherds that could possibly date prior to 1400 when all overlapping sherds on included.



| Country | Region   | Sub-Region | Basin | Bowl |
|---------|----------|------------|-------|------|
| China   | Zhejiang | Longquan   | 1     |      |
| China   | Zhejiang | Longquan   |       | 1    |

**Cluster 7 1400- 1450 Definite.** We recovered 2 sherds that were produced between 1400 and 1450.

| Country  | Region    | Sub-Region | Bowl | Bottle | Lid | Basin | Jar | Vase |
|----------|-----------|------------|------|--------|-----|-------|-----|------|
| Burma    |           |            | 3    |        |     |       |     |      |
| China    | Fujian    |            | 8    |        |     |       |     |      |
| China    | Guangdong |            |      |        |     | 1     |     |      |
| China    | Henan     | Yuzhou     |      |        |     |       |     | 1    |
| China    | Zhejiang  | Longquan   | 13   |        |     |       |     |      |
| China    | Zhejiang  | Longquan   |      |        |     | 1     |     |      |
| China    |           |            |      |        |     | 1     |     |      |
| China    |           |            |      |        |     |       | 1   |      |
| Thailand |           |            |      | 1      |     |       |     |      |
| Thailand |           |            |      |        | 1   |       |     |      |
| Thailand |           |            | 9    |        |     |       |     |      |

**Cluster 7 1400- 1450 Possible.** We recovered 40 sherds that could have been produced between 1400 and 1450.

| Country | Region   | Sub-Region | Bowl | Dish |
|---------|----------|------------|------|------|
| Burma   | Mon      | Martaban   | 1    |      |
| China   | Fujian   |            | 1    |      |
| China   | Jiangxi  | Jingdezhen | 15   |      |
| China   | Jiangxi  | Jingdezhen |      | 2    |
| China   | Zhejiang | Longquan   | 1    |      |

|          |           |  |   |   |
|----------|-----------|--|---|---|
| Thailand |           |  |   | 1 |
| Vietnam  | Hai Duong |  | 1 |   |

**Cluster 7 1450- 1550 Definite.** We recovered 22 sherds that were produced between 1450 and 1550.

| Country  | Region    | Sub-Region | Bowl | Bottle | Cup | Dish | Jar | Lid | Vase |
|----------|-----------|------------|------|--------|-----|------|-----|-----|------|
| Burma    | Mon       | Martaban   | 1    |        |     |      |     |     |      |
| Burma    |           |            | 3    |        |     |      |     |     |      |
| China    | Fujian    |            | 5    |        |     |      |     |     |      |
| China    | Henan     | Yuzhou     |      |        |     |      |     |     | 1    |
| China    | Jiangxi   | Jingdezhen | 18   |        |     |      |     |     |      |
| China    | Jiangxi   | Jingdezhen |      |        | 2   |      |     |     |      |
| China    | Jiangxi   | Jingdezhen |      |        |     | 8    |     |     |      |
| China    | Zhejiang  | Longquan   | 1    |        |     |      |     |     |      |
| China    |           |            |      |        |     |      | 1   |     |      |
| Thailand |           |            |      | 1      |     |      |     |     |      |
| Thailand |           |            |      |        |     |      |     | 1   |      |
| Thailand |           |            | 7    |        |     |      |     |     |      |
| Thailand |           |            |      |        |     | 1    |     |     |      |
| Vietnam  | Hai Duong |            | 1    |        |     |      |     |     |      |

**Cluster 7 1450- 1550 Possible.** We recovered 51 sherds that could have been produced between 1450 and 1550.

| Country | Region | Sub-Region | Bottle | Bowl | Covered Box | Cup | Dish | Jar | Lid | Plate | Vase |
|---------|--------|------------|--------|------|-------------|-----|------|-----|-----|-------|------|
| Burma   | Mon    | Martaban   |        |      |             |     |      | 7   |     |       |      |
| Burma   | Mon    | Martaban   |        | 6    |             |     |      |     |     |       |      |
| China   | Fujian | Dehua      |        | 1    |             |     |      |     |     |       |      |

|       |         |            |   |     |   |   |  |     |   |   |  |   |  |
|-------|---------|------------|---|-----|---|---|--|-----|---|---|--|---|--|
| China | Fujian  | Dehua      |   |     |   |   |  | 1   |   |   |  |   |  |
| China | Fujian  | Zhangzhou  | 1 |     |   |   |  |     |   |   |  |   |  |
| China | Fujian  | Zhangzhou  |   | 54  |   |   |  |     |   |   |  |   |  |
| China | Fujian  | Zhangzhou  |   |     | 2 |   |  |     |   |   |  |   |  |
| China | Fujian  | Zhangzhou  |   |     |   |   |  | 197 |   |   |  |   |  |
| China | Fujian  |            |   | 277 |   |   |  |     |   |   |  |   |  |
| China | Fujian  |            |   |     | 2 |   |  |     |   |   |  |   |  |
| China | Fujian  |            |   |     |   |   |  | 6   |   |   |  |   |  |
| China | Fujian  |            |   |     |   |   |  |     | 1 |   |  |   |  |
| China | Fujian  |            |   |     |   | 1 |  |     |   |   |  |   |  |
| China | Jiangxi | Jingdezhen |   | 19  |   |   |  |     |   |   |  |   |  |
| China | Jiangxi | Jingdezhen |   |     | 2 |   |  |     |   |   |  |   |  |
| China | Jiangxi | Jingdezhen |   |     |   |   |  | 6   |   |   |  |   |  |
| China | Jiangxi | Jingdezhen |   |     |   |   |  |     |   | 1 |  |   |  |
| China | Jiangxi | Jingdezhen |   |     |   |   |  |     |   |   |  | 1 |  |
| China |         |            |   |     |   |   |  | 2   |   |   |  |   |  |

**Cluster 7 1550- 1650 Definite.** We recovered 587 sherds that were produced between 1550 and 1650.

| Country | Region | Sub-Region | Bottle | Bowl | Covered Box | Cup | Dish | Jar | Lid | Plate | Potiche | Vase | Unknown |
|---------|--------|------------|--------|------|-------------|-----|------|-----|-----|-------|---------|------|---------|
| Burma   | Mon    | Martaban   |        |      |             |     |      | 14  |     |       |         |      |         |
| Burma   | Mon    | Martaban   |        | 6    |             |     |      |     |     |       |         |      |         |
| Burma   |        |            |        |      |             |     |      | 2   |     |       |         |      |         |
| China   | Fujian | Dehua      | 1      |      |             |     |      |     |     |       |         |      |         |
| China   | Fujian | Dehua      |        | 3    |             |     |      |     |     |       |         |      |         |
| China   | Fujian | Dehua      |        |      | 3           |     |      |     |     |       |         |      |         |

|       |         |            |   |     |   |   |     |   |   |   |   |   |   |
|-------|---------|------------|---|-----|---|---|-----|---|---|---|---|---|---|
| China | Fujian  | Dehua      |   |     |   | 3 |     |   |   |   |   |   |   |
| China | Fujian  | Dehua      |   |     |   |   |     | 1 |   |   |   |   |   |
| China | Fujian  | Dehua      |   |     |   |   |     |   | 2 |   |   |   |   |
| China | Fujian  | Dehua      |   |     |   |   |     |   |   |   | 7 |   |   |
| China | Fujian  | Zhangzhou  | 1 |     |   |   |     |   |   |   |   |   |   |
| China | Fujian  | Zhangzhou  |   | 66  |   |   |     |   |   |   |   |   |   |
| China | Fujian  | Zhangzhou  |   |     | 2 |   |     |   |   |   |   |   |   |
| China | Fujian  | Zhangzhou  |   |     |   |   | 213 |   |   |   |   |   |   |
| China | Fujian  |            |   | 320 |   |   |     |   |   |   |   |   |   |
| China | Fujian  |            |   |     | 1 |   |     |   |   |   |   |   |   |
| China | Fujian  |            |   |     |   |   | 9   |   |   |   |   |   |   |
| China | Fujian  |            |   |     |   |   |     | 1 |   |   |   |   |   |
| China | Fujian  |            |   |     |   |   | 3   |   |   |   |   |   |   |
| China | Fujian  |            |   |     |   |   |     | 1 |   |   |   |   |   |
| China | Fujian  |            |   |     |   |   |     |   | 1 |   |   |   |   |
| China | Fujian  |            |   |     |   | 2 |     |   |   |   |   |   |   |
| China | Jiangxi | Jingdezhen |   | 25  |   |   |     |   |   |   |   |   |   |
| China | Jiangxi | Jingdezhen |   |     | 2 |   |     |   |   |   |   |   |   |
| China | Jiangxi | Jingdezhen |   |     |   | 2 |     |   |   |   |   |   |   |
| China | Jiangxi | Jingdezhen |   |     |   |   | 12  |   |   |   |   |   |   |
| China | Jiangxi | Jingdezhen |   |     |   |   |     |   |   | 1 |   |   |   |
| China | Jiangxi | Jingdezhen |   |     |   |   |     |   |   |   |   | 1 |   |
| China | Fujian  | Zhangzhou  |   |     |   |   | 2   |   |   |   |   |   |   |
| China |         |            |   |     |   |   |     | 5 |   |   |   |   |   |
| China |         |            |   |     |   |   |     |   |   |   |   |   | 1 |
| Japan | Hizen   |            |   | 1   |   |   |     |   |   |   |   |   |   |

|          |  |  |  |   |  |  |  |  |  |  |  |  |  |  |  |  |  |
|----------|--|--|--|---|--|--|--|--|--|--|--|--|--|--|--|--|--|
| Thailand |  |  |  | 1 |  |  |  |  |  |  |  |  |  |  |  |  |  |
|----------|--|--|--|---|--|--|--|--|--|--|--|--|--|--|--|--|--|

**Cluster 7 1550- 1650 Possible.** We recovered 715 sherds that were produced between 1550 and 1650.

| Country | Region | Sub-Region | Base | Basin | Bowl | Covered Box | Cup | Dish | Jar | Kendi | Lid | Pot | Potiche | Saucer | Spoon | Stem Cup | Vase | Unknown |
|---------|--------|------------|------|-------|------|-------------|-----|------|-----|-------|-----|-----|---------|--------|-------|----------|------|---------|
| Burma   | Mon    | Martaban   |      |       |      |             |     |      | 269 |       |     |     |         |        |       |          |      |         |
| Burma   | Mon    | Martaban   |      |       | 25   |             |     |      |     |       |     |     |         |        |       |          |      |         |
| Burma   | Mon    | Martaban   |      |       |      |             |     | 1    |     |       |     |     |         |        |       |          |      |         |
| Burma   | Mon    | Martaban   |      |       |      |             |     |      |     |       |     | 1   |         |        |       |          |      |         |
| Burma   |        |            |      |       | 4    |             |     |      |     |       |     |     |         |        |       |          |      |         |
| Burma   |        |            |      |       |      |             |     | 8    |     |       |     |     |         |        |       |          |      |         |
| Burma   |        |            |      |       |      |             |     |      |     |       |     |     |         |        |       |          |      | 1       |
| China   | Fujian | Anxi       |      |       | 2    |             |     |      |     |       |     |     |         |        |       |          |      |         |
| China   | Fujian | Dehua      |      |       | 63   |             |     |      |     |       |     |     |         |        |       |          |      |         |
| China   | Fujian | Dehua      |      |       |      | 3           |     |      |     |       |     |     |         |        |       |          |      |         |
| China   | Fujian | Dehua      |      |       |      |             |     | 13   |     |       |     |     |         |        |       |          |      |         |
| China   | Fujian | Dehua      |      |       |      |             |     |      |     |       | 2   |     |         |        |       |          |      |         |
| China   | Fujian | Dehua      |      |       |      |             |     |      |     |       |     |     | 3       |        |       |          |      |         |
| China   | Fujian | Zhangzhou  |      |       | 135  |             |     |      |     |       |     |     |         |        |       |          |      |         |
| China   | Fujian | Zhangzhou  |      |       |      |             |     | 98   |     |       |     |     |         |        |       |          |      |         |
| China   | Fujian | Zhangzhou  |      |       |      |             |     |      |     |       | 1   |     |         |        |       |          |      |         |
| China   | Fujian |            |      |       | 1134 |             |     |      |     |       |     |     |         |        |       |          |      |         |
| China   | Fujian |            |      |       |      |             |     |      |     |       | 9   |     |         |        |       |          |      |         |
| China   | Fujian |            |      |       |      | 4           |     |      |     |       |     |     |         |        |       |          |      |         |
| China   | Fujian |            |      |       |      |             | 2   |      |     |       |     |     |         |        |       |          |      |         |
| China   | Fujian |            |      |       |      |             |     | 121  |     |       |     |     |         |        |       |          |      |         |

|         |           |            |   |   |    |   |  |     |   |  |    |   |   |   |   |  |   |
|---------|-----------|------------|---|---|----|---|--|-----|---|--|----|---|---|---|---|--|---|
| China   | Fujian    |            |   |   |    |   |  | 6   |   |  |    |   |   |   |   |  |   |
| China   | Fujian    |            |   |   |    |   |  |     | 1 |  |    |   |   |   |   |  |   |
| China   | Fujian    |            |   |   |    |   |  |     |   |  |    | 6 |   |   |   |  |   |
| China   | Fujian    |            |   |   |    |   |  |     |   |  |    |   |   |   | 2 |  |   |
| China   | Fujian    |            |   |   |    |   |  |     |   |  |    |   |   | 1 |   |  |   |
| China   | Jiangxi   | Jingdezhen |   |   | 29 |   |  |     |   |  |    |   |   |   |   |  |   |
| China   | Jiangxi   | Jingdezhen |   |   |    |   |  |     |   |  | 3  |   |   |   |   |  |   |
| China   | Jiangxi   | Jingdezhen |   |   |    | 2 |  |     |   |  |    |   |   |   |   |  |   |
| China   | Jiangxi   | Jingdezhen |   |   |    |   |  | 6   |   |  |    |   |   |   |   |  |   |
| China   | Jiangxi   | Jingdezhen |   |   |    |   |  | 19  |   |  |    |   |   |   |   |  |   |
| China   | Jiangxi   | Jingdezhen |   |   |    |   |  |     |   |  |    | 1 |   |   |   |  |   |
| China   | Jiangxi   | Jingdezhen |   |   |    |   |  |     |   |  |    |   | 1 |   |   |  |   |
| China   | Jiangxi   | Jingdezhen |   |   |    |   |  |     |   |  |    |   |   |   |   |  | 1 |
| China   |           |            |   |   |    |   |  |     | 3 |  |    |   |   |   |   |  |   |
| Japan   | Hizen     |            |   |   |    |   |  | 4   |   |  |    |   |   |   |   |  |   |
| Japan   | Hizen     |            | 2 |   |    |   |  |     |   |  |    |   |   |   |   |  |   |
| Japan   | Hizen     |            |   |   | 51 |   |  |     |   |  |    |   |   |   |   |  |   |
| Japan   | Hizen     |            |   |   |    |   |  |     |   |  | 12 |   |   |   |   |  |   |
| Japan   | Hizen     |            |   |   |    | 3 |  |     |   |  |    |   |   |   |   |  |   |
| Japan   | Hizen     |            |   |   |    |   |  | 231 |   |  |    |   |   |   |   |  |   |
| Japan   | Hizen     |            |   | 1 |    |   |  |     |   |  |    |   |   |   |   |  |   |
| Japan   | Hizen     |            |   |   |    |   |  |     |   |  |    | 8 |   |   |   |  |   |
| Japan   | Hizen     |            |   |   |    |   |  |     |   |  |    |   | 2 |   |   |  |   |
| Japan   | Hizen     |            |   |   |    |   |  |     |   |  |    |   |   |   |   |  | 1 |
| Vietnam | Hai Duong | Hop Le     |   |   | 97 |   |  |     |   |  |    |   |   |   |   |  |   |
| Vietnam | Hai Duong | Hop Le     |   |   |    |   |  | 33  |   |  |    |   |   |   |   |  |   |

|         |           |  |  |  |  |  |  |  |   |  |  |  |  |  |  |  |  |  |
|---------|-----------|--|--|--|--|--|--|--|---|--|--|--|--|--|--|--|--|--|
| Vietnam | Hai Duong |  |  |  |  |  |  |  | 1 |  |  |  |  |  |  |  |  |  |
|---------|-----------|--|--|--|--|--|--|--|---|--|--|--|--|--|--|--|--|--|

**Cluster 7 1650- 1800 Definite.** We recovered 2,426 sherds that were produced between 1650 and 1800.

### CLUSTER 8 TRADE CERAMICS DATA

| Country | Region    | Sub-Region | Basin | Bowl | Covered Box | Dish | Ewer | Jar | Potiche | Washer |
|---------|-----------|------------|-------|------|-------------|------|------|-----|---------|--------|
| China   | Fujian    | Cizao      |       |      |             |      |      | 27  |         |        |
| China   | Fujian    | Dehua      |       |      | 1           |      |      |     |         |        |
| China   | Fujian    | Minnan     |       | 23   |             |      |      |     |         |        |
| China   | Fujian    | Minnan     |       |      |             |      |      | 4   |         |        |
| China   | Fujian    | Tongan     |       | 45   |             |      |      |     |         |        |
| China   | Fujian    | Tongan     |       |      |             |      | 2    |     |         |        |
| China   | Fujian    |            |       | 1    |             |      |      |     |         |        |
| China   | Fujian    |            |       |      |             |      |      | 4   |         |        |
| China   | Guangdong |            | 7     |      |             |      |      |     |         |        |
| China   | Guangdong |            |       |      |             |      |      | 266 |         |        |
| China   | Guangdong | Xicun      |       | 1    |             |      |      |     |         |        |
| China   | Guangdong | Xicun      | 1     |      |             |      |      |     |         |        |
| China   | Jiangxi   | Jingdezhen |       |      |             | 1    |      |     |         |        |
| China   | Zhejiang  | Longquan   |       | 38   |             |      |      |     |         |        |
| China   | Zhejiang  | Longquan   |       |      |             | 28   |      |     |         |        |
| China   | Zhejiang  | Longquan   |       |      |             |      |      | 1   |         |        |
| China   | Zhejiang  | Longquan   |       |      |             |      |      |     | 1       |        |
| China   | Zhejiang  | Longquan   |       |      |             |      |      |     |         | 3      |
| China   |           |            |       |      |             |      |      | 3   |         |        |

**Cluster 8 Pre-1400 Definite.** This table includes a total of 457 sherds that date prior to 1400. When overlapping sherds are included there is a total of 458 sherds that could possibly date to this period (no table included for maximum possible due to negligible difference in sherd count).



| Country | Region    | Sub-Region | Jar |
|---------|-----------|------------|-----|
| China   | Guangdong |            | 1   |

**Cluster 8 1400 - 1450 Definite.** There is 1 sherd that was produced between 1400 and 1450.

| Country  | Region    | Sub-Region  | Dish | Jar |
|----------|-----------|-------------|------|-----|
| Burma    | Mon       | Martaban    | 1    |     |
| Burma    | Mon       | Martaban    |      | 2   |
| China    | Guangdong |             |      | 1   |
| Thailand | Sukhothai | Sawankhalok | 1    |     |
| Thailand |           |             | 2    |     |
| Vietnam  | Hai Duong |             | 1    |     |

**Cluster 8 1400 – 1450 Possible.** There are 8 sherds that could have been produced between 1400 and 1450.

| Country  | Region    | Sub-Region  | Bowl | Dish | Jar |
|----------|-----------|-------------|------|------|-----|
| Burma    | Mon       | Martaban    |      | 2    |     |
| Burma    | Mon       | Martaban    |      |      | 3   |
| Burma    | Yangon    | Twante      | 14   |      |     |
| China    | Jiangxi   | Jingdezhen  |      | 2    |     |
| Thailand | Sukhothai | Sawankhalok | 19   |      |     |
| Vietnam  | Hai Duong |             | 1    |      |     |

**Cluster 8 1450 - 1550 Definite.** We recovered 41 sherds that were produced between 1450 and 1550.

| Region    | Sub-Region  | Basin | Bowl | Cup | Dish | Jar | Potiche | Unknown |
|-----------|-------------|-------|------|-----|------|-----|---------|---------|
| Mon       | Martaban    | 2     |      |     |      |     |         |         |
| Mon       | Martaban    |       |      |     | 3    |     |         |         |
| Mon       | Martaban    |       |      |     |      | 11  |         |         |
| Fujian    | Dehua       |       |      |     |      |     | 4       |         |
| Fujian    | Dehua       |       |      |     |      |     |         | 1       |
| Fujian    | Zhangzhou   |       | 12   |     |      |     |         |         |
| Fujian    | Zhangzhou   |       |      |     | 33   |     |         |         |
| Jiangxi   | Jingdezhen  |       | 2    |     |      |     |         |         |
| Jiangxi   | Jingdezhen  |       |      | 1   |      |     |         |         |
| Jiangxi   | Jingdezhen  |       |      |     | 2    |     |         |         |
| Sukhothai | Sawankhalok |       | 1    |     |      |     |         |         |

**Cluster 8 1450 - 1550 Possible.** We recovered 72 sherds that could have been produced between 1450 and 1550.

| Country | Region  | Sub-Region | Bowl | Dish |
|---------|---------|------------|------|------|
| China   | Fujian  | Zhangzhou  | 12   |      |
| China   | Fujian  | Zhangzhou  |      | 32   |
| China   | Jiangxi | Jingdezhen | 2    |      |
| China   | Jiangxi | Jingdezhen |      | 2    |

**Cluster 8 1550 - 1650 Definite.** We recovered 48 sherds that were produced between 1550 and 1650.

| Country | Region | Sub-Region | Basin | Bowl | Cup | Dish | Jar | Potiche | Unknown |
|---------|--------|------------|-------|------|-----|------|-----|---------|---------|
| Burma   | Mon    | Martaban   | 2     |      |     |      |     |         |         |
| Burma   | Mon    | Martaban   |       |      |     | 3    |     |         |         |
| Burma   | Mon    | Martaban   |       |      |     |      | 11  |         |         |

|          |           |             |  |    |  |    |  |   |   |
|----------|-----------|-------------|--|----|--|----|--|---|---|
| China    | Fujian    | Dehua       |  |    |  |    |  | 4 |   |
| China    | Fujian    | Dehua       |  |    |  |    |  |   | 1 |
| China    | Fujian    | Zhangzhou   |  | 12 |  |    |  |   |   |
| China    | Fujian    | Zhangzhou   |  |    |  | 33 |  |   |   |
| China    | Jiangxi   | Jingdezhen  |  | 2  |  |    |  |   |   |
| China    | Jiangxi   | Jingdezhen  |  |    |  | 2  |  |   |   |
| Thailand | Sukhothai | Sawankhalok |  | 1  |  |    |  |   |   |

**Cluster 8 1550 - 1650 Possible.** We recovered 71 sherds that could have been produced between 1550 and 1650.

| Country | Region  | Sub-Region | Bowl | Dish |
|---------|---------|------------|------|------|
| China   | Fujian  | Dehua      | 8    |      |
| China   | Fujian  | Zhangzhou  | 42   |      |
| China   | Fujian  | Zhangzhou  |      | 18   |
| China   | Fujian  |            | 15   |      |
| China   | Jiangxi | Jingdezhen | 1    |      |
| Japan   | Hizen   |            | 2    |      |
| Japan   | Hizen   |            |      | 6    |

**Cluster 8 1650 - 1800 Definite.** We recovered 92 sherds that were produced between 1650 and 1800.

| Country | Region | Sub-Region | Basin | Bowl | Cup | Dish | Jar | Potiche | Tea Pot | Unknown |
|---------|--------|------------|-------|------|-----|------|-----|---------|---------|---------|
| Burma   | Mon    | Martaban   | 2     |      |     |      |     |         |         |         |
| Burma   | Mon    | Martaban   |       |      |     | 3    |     |         |         |         |
| Burma   | Mon    | Martaban   |       |      |     |      | 10  |         |         |         |
| China   | Fujian | Dehua      |       | 9    |     |      |     |         |         |         |
| China   | Fujian | Dehua      |       |      |     | 4    |     |         |         |         |

|       |         |            |  |    |   |    |  |   |   |   |
|-------|---------|------------|--|----|---|----|--|---|---|---|
| China | Fujian  | Dehua      |  |    |   |    |  | 4 |   |   |
| China | Fujian  | Dehua      |  |    |   |    |  |   |   | 1 |
| China | Fujian  | Zhangzhou  |  | 58 |   |    |  |   |   |   |
| China | Fujian  | Zhangzhou  |  |    |   | 22 |  |   |   |   |
| China | Fujian  |            |  | 19 |   |    |  |   |   |   |
| China | Jiangsu | Yixing     |  |    |   |    |  |   | 1 |   |
| China | Jiangxi | Jingdezhen |  | 1  |   |    |  |   |   |   |
| China | Jiangxi | Jingdezhen |  |    | 1 |    |  |   |   |   |
| Japan | Hizen   |            |  | 2  |   |    |  |   |   |   |
| Japan | Hizen   |            |  |    |   | 6  |  |   |   |   |

**Cluster 8 1650 - 1800 Possible.** We recovered 143 sherds that could have been produced between 1650 and 1800.

### CLUSTER 9 TRADE CERAMICS DATA

| Country  | Region    | Sub-Region | Basin | Bottle | Bowl | Jar | Jarlet | Pot | Washer |
|----------|-----------|------------|-------|--------|------|-----|--------|-----|--------|
| China    | Fujian    | Cizao      |       |        |      | 36  |        |     |        |
| China    | Fujian    | Dehua      |       |        | 2    |     |        |     |        |
| China    | Fujian    | Minnan     |       | 1      |      |     |        |     |        |
| China    | Fujian    | Minnan     |       |        | 16   |     |        |     |        |
| China    | Fujian    | Minnan     |       |        |      | 10  |        |     |        |
| China    | Fujian    | Minnan     |       |        |      |     | 1      |     |        |
| China    | Fujian    | Minnan     | 2     |        |      |     |        |     |        |
| China    | Fujian    | Quanzhou   |       |        | 7    |     |        |     |        |
| China    | Fujian    | Tongan     |       |        | 8    |     |        |     |        |
| China    | Fujian    |            |       |        |      | 11  |        |     |        |
| China    | Guangdong |            |       |        |      | 47  |        |     |        |
| China    | Guangdong |            |       |        |      |     |        | 1   |        |
| China    | Zhejiang  | Longquan   |       |        | 24   |     |        |     |        |
| China    | Zhejiang  | Longquan   |       |        |      |     |        |     | 1      |
| China    |           |            |       | 2      |      |     |        |     |        |
| China    |           |            |       |        |      | 26  |        |     |        |
| China    |           |            | 1     |        |      |     |        |     |        |
| Thailand | Sukhothai | Sukhothai  |       |        | 1    |     |        |     |        |

**Cluster 9 Pre-1400 Definite.** This table includes a total of 197 sherds that date prior to 1400.

| Country | Region | Sub-Region | Dish | Jar |
|---------|--------|------------|------|-----|
| Burma   | Mon    | Martaban   | 1    |     |
| Burma   | Mon    | Martaban   |      | 1   |

**Cluster 9 1400 – 1450 Possible.** There are no sherds that were definitely produced between 1400 and 1450. We identified 2 sherds that could have been produced during this period.

| Country | Region | Sub-Region | Bowl |
|---------|--------|------------|------|
| Burma   | Karen  | Kaw Don    | 2    |

**Cluster 9 1450 – 1550 Definite.** Only 2 sherds were recovered that were produced between 1450 and 1550.

| Country | Region | Sub-Region | Bowl | Dish | Jar |
|---------|--------|------------|------|------|-----|
| Burma   | Karen  | Kaw Don    | 2    |      |     |
| Burma   | Mon    | Martaban   |      | 2    |     |
| Burma   | Mon    | Martaban   |      |      | 1   |

**Cluster 9 1450 – 1550 Possible.** Only 5 sherds were recovered that could have been produced between 1450 and 1550.

| Country | Region | Sub-Region | Bowl | Dish |
|---------|--------|------------|------|------|
| China   | Fujian | Zhangzhou  | 6    |      |
| China   | Fujian | Zhangzhou  |      | 2    |

**Cluster 9 1550 – 1650 Definite.** Only 2 sherds were recovered that were produced between 1550 and 1650.

| Country | Region | Sub-Region | Bowl | Dish | Jar |
|---------|--------|------------|------|------|-----|
| Burma   | Mon    | Martaban   |      | 1    |     |
| Burma   | Mon    | Martaban   |      |      | 12  |
| China   | Fujian | Zhangzhou  | 6    |      |     |
| China   | Fujian | Zhangzhou  |      | 2    |     |

**Cluster 9 1550 – 1650 Possible.** We recovered 21 sherds that could have been produced between 1550 and 1650.

| Country | Region    | Sub-Region | Bowl | Dish | Lid | Potiche | Tea Pot |
|---------|-----------|------------|------|------|-----|---------|---------|
| China   | Fujian    | Dehua      | 6    |      |     |         |         |
| China   | Fujian    | Dehua      |      | 1    |     |         |         |
| China   | Fujian    | Zhangzhou  | 53   |      |     |         |         |
| China   | Fujian    | Zhangzhou  |      | 3    |     |         |         |
| China   | Fujian    |            | 15   |      |     |         |         |
| China   | Jiangsu   | Yixing     |      |      |     |         | 2       |
| China   | Jiangxi   | Jingdezhen | 1    |      |     |         |         |
| China   | Jiangxi   | Jingdezhen |      |      | 1   |         |         |
| China   | Jiangxi   | Jingdezhen |      |      |     | 1       |         |
| Japan   | Hizen     |            | 1    |      |     |         |         |
| Japan   | Hizen     |            |      | 1    |     |         |         |
| Vietnam | Hai Duong | Hop Le     | 4    |      |     |         |         |

**Cluster 9 1650 – 1800 Definite.** We recovered 89 sherds that were produced between 1650 and 1800.

| Country | Region    | Sub-Region | Bowl | Dish | Jar | Lid | Potiche | Tea Pot |
|---------|-----------|------------|------|------|-----|-----|---------|---------|
| Burma   | Mon       | Martaban   |      |      | 12  |     |         |         |
| China   | Fujian    | Dehua      | 7    |      |     |     |         |         |
| China   | Fujian    | Dehua      |      | 1    |     |     |         |         |
| China   | Fujian    | Zhangzhou  | 62   |      |     |     |         |         |
| China   | Fujian    | Zhangzhou  |      | 7    |     |     |         |         |
| China   | Fujian    |            | 17   |      |     |     |         |         |
| China   | Jiangsu   | Yixing     |      |      |     |     |         | 2       |
| China   | Jiangxi   | Jingdezhen | 1    |      |     |     |         |         |
| China   | Jiangxi   | Jingdezhen |      |      |     | 1   |         |         |
| China   | Jiangxi   | Jingdezhen |      |      |     |     | 1       |         |
| Japan   | Hizen     |            | 1    |      |     |     |         |         |
| Japan   | Hizen     |            |      | 1    |     |     |         |         |
| Vietnam | Hai Duong | Hop Le     | 4    |      |     |     |         |         |

**Cluster 9 1650 – 1800 Possible.** We recovered 117 sherds that could have been produced between 1650 and 1800.



### CLUSTER 10 TRADE CERAMICS DATA

| Country | Region    | Sub-Region | Basin | Bowl | Box | Brush Washer | Cooking Pot | Covered Box | Dish | Ewer | Jar  | Jarlet | Kendi | Khadai | Lid | Pot | Potiche | Saucer | Vase | Unknown |
|---------|-----------|------------|-------|------|-----|--------------|-------------|-------------|------|------|------|--------|-------|--------|-----|-----|---------|--------|------|---------|
| Burma   |           |            |       | 2    |     |              |             |             |      |      |      |        |       |        |     |     |         |        |      |         |
| Burma   | Mon       | Martaban   |       |      |     |              |             |             |      |      | 2    |        |       |        |     |     |         |        |      |         |
| China   | Fujian    | Cizao      |       |      |     |              |             |             |      |      | 70   |        |       |        |     |     |         |        |      |         |
| China   | Fujian    | Cizao      |       |      |     |              |             |             |      |      |      |        | 1     |        |     |     |         |        |      |         |
| China   | Fujian    | Dehua      |       | 4    |     |              |             |             |      |      |      |        |       |        |     |     |         |        |      |         |
| China   | Fujian    | Dehua      |       |      | 4   |              |             |             |      |      |      |        |       |        |     |     |         |        |      |         |
| China   | Fujian    | Dehua      |       |      |     |              |             | 6           |      |      |      |        |       |        |     |     |         |        |      |         |
| China   | Fujian    | Dehua      |       |      |     |              |             |             |      |      | 1    |        |       |        |     |     |         |        |      |         |
| China   | Fujian    | Dehua      |       |      |     |              |             |             |      |      |      |        |       |        | 1   |     |         |        |      |         |
| China   | Fujian    | Quanzhou   |       | 12   |     |              |             |             |      |      |      |        |       |        |     |     |         |        |      |         |
| China   | Fujian    | Tongan     |       | 171  |     |              |             |             |      |      |      |        |       |        |     |     |         |        |      |         |
| China   | Fujian    | Tongan     |       |      |     |              |             |             |      |      |      |        |       |        |     |     |         | 1      |      |         |
| China   | Fujian    | Tongan     |       |      |     |              |             |             |      |      |      |        |       |        |     |     |         |        |      | 1       |
| China   | Fujian    | Minnan     | 6     |      |     |              |             |             |      |      |      |        |       |        |     |     |         |        |      |         |
| China   | Fujian    | Minnan     |       | 141  |     |              |             |             |      |      |      |        |       |        |     |     |         |        |      |         |
| China   | Fujian    | Minnan     |       |      |     |              |             |             |      | 1    |      |        |       |        |     |     |         |        |      |         |
| China   | Fujian    | Minnan     |       |      |     |              |             |             |      |      | 8    |        |       |        |     |     |         |        |      |         |
| China   | Fujian    | Minnan     |       |      |     |              |             |             |      |      |      | 3      |       |        |     |     |         |        |      |         |
| China   | Fujian    |            | 5     |      |     |              |             |             |      |      |      |        |       |        |     |     |         |        |      |         |
| China   | Fujian    |            |       |      |     |              |             |             |      |      | 21   |        |       |        |     |     |         |        |      |         |
| China   | Fujian    |            |       | 3    |     |              |             |             |      |      |      |        |       |        |     |     |         |        |      |         |
| China   | Guangdong | Guangzhou  |       |      |     |              |             |             |      |      | 4    |        |       |        |     |     |         |        |      |         |
| China   | Guangdong |            | 37    |      |     |              |             |             |      |      |      |        |       |        |     |     |         |        |      |         |
| China   | Guangdong |            |       | 15   |     |              |             |             |      |      |      |        |       |        |     |     |         |        |      |         |
| China   | Guangdong |            |       |      |     |              |             |             |      |      | 1097 |        |       |        |     |     |         |        |      |         |
| China   | Guangdong |            |       |      |     |              |             |             |      |      |      | 2      |       |        |     |     |         |        |      |         |
| China   | Guangdong |            |       |      |     |              |             |             |      |      |      |        |       |        |     |     |         |        |      | 4       |

|          |           |            |  |     |  |  |   |   |     |   |   |    |  |   |   |  |  |   |    |
|----------|-----------|------------|--|-----|--|--|---|---|-----|---|---|----|--|---|---|--|--|---|----|
| China    | Hebei     | Cizhou     |  | 1   |  |  |   |   |     |   |   |    |  |   |   |  |  |   |    |
| China    | Hebei     | Cizhou     |  |     |  |  |   |   |     | 3 |   |    |  |   |   |  |  |   |    |
| China    | Hebei     | Quyang     |  | 1   |  |  |   |   |     |   |   |    |  |   |   |  |  |   |    |
| China    | Jiangxi   | Jingdezhen |  | 68  |  |  |   |   |     |   |   |    |  |   |   |  |  |   |    |
| China    | Jiangxi   | Jingdezhen |  |     |  |  |   |   |     | 2 |   |    |  |   |   |  |  |   |    |
| China    | Jiangxi   | Jingdezhen |  |     |  |  |   | 6 |     |   |   |    |  |   |   |  |  |   |    |
| China    | Jiangxi   | Jingdezhen |  |     |  |  |   |   | 2   |   |   |    |  |   |   |  |  |   |    |
| China    | Jiangxi   | Jingdezhen |  |     |  |  |   |   |     |   | 2 |    |  |   |   |  |  |   |    |
| China    | Jiangxi   | Jingdezhen |  |     |  |  |   |   |     |   |   |    |  |   |   |  |  |   | 1  |
| China    | Jiangxi   | Jingdezhen |  |     |  |  |   |   |     |   |   |    |  |   |   |  |  | 1 |    |
| China    | Zhejiang  | Longquan   |  | 260 |  |  |   |   |     |   |   |    |  |   |   |  |  |   |    |
| China    | Zhejiang  | Longquan   |  |     |  |  | 4 |   |     |   |   |    |  |   |   |  |  |   |    |
| China    | Zhejiang  | Longquan   |  |     |  |  |   |   | 132 |   |   |    |  |   |   |  |  |   |    |
| China    | Zhejiang  | Longquan   |  |     |  |  |   |   |     | 1 |   |    |  |   |   |  |  |   |    |
| China    | Zhejiang  | Longquan   |  |     |  |  |   |   |     |   | 8 |    |  |   |   |  |  |   |    |
| China    | Zhejiang  | Longquan   |  |     |  |  |   |   |     |   |   | 10 |  |   |   |  |  |   |    |
| China    | Zhejiang  | Longquan   |  |     |  |  |   |   |     |   |   |    |  |   |   |  |  | 1 |    |
| China    | Zhejiang  | Longquan   |  |     |  |  |   |   |     |   |   |    |  |   | 1 |  |  |   |    |
| China    |           |            |  |     |  |  |   |   |     |   | 6 |    |  |   |   |  |  |   |    |
| India    |           |            |  |     |  |  | 9 |   |     |   |   |    |  |   |   |  |  |   |    |
| India    |           |            |  |     |  |  |   |   |     |   | 1 |    |  |   |   |  |  |   |    |
| India    |           |            |  |     |  |  |   |   |     |   |   |    |  | 3 |   |  |  |   |    |
| India    |           |            |  |     |  |  |   |   |     |   |   |    |  |   |   |  |  |   | 26 |
| India    |           |            |  | 1   |  |  |   |   |     |   |   |    |  |   |   |  |  |   |    |
| Syria    | Raqqa     |            |  |     |  |  |   |   |     |   | 1 |    |  |   |   |  |  |   |    |
| Thailand | Ayutthaya |            |  |     |  |  |   |   |     |   |   |    |  |   | 2 |  |  |   |    |
| Thailand | Ayutthaya |            |  |     |  |  |   |   |     |   |   |    |  |   |   |  |  |   | 2  |
| Vietnam  | Hai Duong |            |  | 9   |  |  |   |   |     |   |   |    |  |   |   |  |  |   |    |

**Cluster 10 Pre-1400 Definite.** This table includes a total of 2,188 sherds that date prior to 1400. This excludes all sherds that extend beyond 1400. A total of 2,221 sherds could possibly date prior to 1400, if all overlapping sherds are included. The difference of 33 sherds has no impact on our analysis and interpretation for this paper, and therefore we do not include a table for all possible sherds from this period.

| Country  | Region    | Sub-Region  | Bowl | Covered Box | Dish | Jar | Unknown |
|----------|-----------|-------------|------|-------------|------|-----|---------|
| Burma    |           |             | 8    |             |      |     |         |
| Burma    |           |             |      |             |      | 2   |         |
| China    | Guangdong |             |      |             |      | 4   |         |
| China    | Zhejiang  | Longquan    | 3    |             |      |     |         |
| China    | Zhejiang  | Longquan    |      |             | 12   |     |         |
| China    | Zhejiang  | Longquan    | 1    |             |      |     |         |
| China    | Zhejiang  | Longquan    |      |             |      | 1   |         |
| Thailand | Ayutthaya |             |      |             |      |     | 2       |
| Thailand | Sukhothai | Sawankhalok | 15   |             |      |     |         |
| Thailand | Sukhothai | Sukhothai   | 1    |             |      |     |         |
| Vietnam  | Hai Duong |             | 6    |             |      |     |         |
| Vietnam  | Hai Duong |             |      | 1           |      |     |         |

**Cluster 10 1400 - 1450 Definite.** We identified a total of 56 sherds that were produced between 1400 – 1450.

| Country | Region    | Sub-Region | Bottle | Bowl | Covered Box | Dish | Jar | Lid | Unknown |
|---------|-----------|------------|--------|------|-------------|------|-----|-----|---------|
| Burma   |           |            |        | 8    |             |      |     |     |         |
| Burma   |           |            |        |      |             |      | 2   |     |         |
| Burma   | Mon       | Martaban   |        | 8    |             |      |     |     |         |
| Burma   | Mon       | Martaban   |        |      |             | 33   |     |     |         |
| Burma   | Mon       | Martaban   |        |      |             |      | 105 |     |         |
| Burma   | Yangon    | Twante     |        | 5    |             |      |     |     |         |
| China   | Guangdong |            |        |      |             |      | 5   |     |         |
| China   | Zhejiang  | Longquan   |        | 6    |             |      |     |     |         |
| China   | Zhejiang  | Longquan   |        |      |             | 15   |     |     |         |

|          |           |             |   |    |   |    |  |   |   |
|----------|-----------|-------------|---|----|---|----|--|---|---|
| Thailand | Ayutthaya |             |   |    |   |    |  |   | 2 |
| Thailand | Sukhothai | Sawankhalok | 3 |    |   |    |  |   |   |
| Thailand | Sukhothai | Sawankhalok |   | 56 |   |    |  |   |   |
| Thailand | Sukhothai | Sawankhalok |   |    |   | 57 |  |   |   |
| Thailand | Sukhothai | Sawankhalok |   |    |   |    |  | 4 |   |
| Thailand | Sukhothai | Sawankhalok |   |    |   |    |  |   | 1 |
| Thailand | Sukhothai | Sukhothai   |   |    |   | 8  |  |   |   |
| Thailand | Sukhothai | Sukhothai   |   | 1  |   |    |  |   |   |
| Thailand |           |             |   | 2  |   |    |  |   |   |
| Vietnam  | Hai Duong |             |   | 15 |   |    |  |   |   |
| Vietnam  | Hai Duong |             |   |    | 1 |    |  |   |   |
| Vietnam  | Hai Duong |             |   |    |   | 1  |  |   |   |

**Cluster 10 1400 - 1450 Possible.** We identified a total of 338 sherds that could have been produced between 1400 and 1450. Some of the ceramics from Thailand and Burma can only be dated between 1400 and 1500.

| Country | Region | Sub-Region | Basin | Bottle | Bowl | Dish | Jar | Jarlet | Vase |
|---------|--------|------------|-------|--------|------|------|-----|--------|------|
| Burma   |        |            |       |        | 21   |      |     |        |      |
| Burma   |        |            |       |        |      |      | 4   |        |      |
| Burma   | Mon    | Martaban   | 1     |        |      |      |     |        |      |
| Burma   | Mon    | Martaban   |       |        | 2    |      |     |        |      |
| Burma   | Mon    | Martaban   |       |        |      | 5    |     |        |      |
| Burma   | Mon    | Martaban   |       |        |      |      | 26  |        |      |
| Burma   | Yangon | Twante     |       |        | 12   |      |     |        |      |
| Burma   | Yangon | Twante     |       |        |      | 1    |     |        |      |
| China   | Fujian |            |       |        | 1    |      |     |        |      |

|          |           |             |  |   |     |    |  |   |  |   |
|----------|-----------|-------------|--|---|-----|----|--|---|--|---|
| China    | Jiangxi   | Jingdezhen  |  |   | 9   |    |  |   |  |   |
| China    | Jiangxi   | Jingdezhen  |  |   |     | 1  |  |   |  |   |
| Thailand | Sukhothai | Sawankhalok |  | 9 |     |    |  |   |  |   |
| Thailand | Sukhothai | Sawankhalok |  |   | 102 |    |  |   |  |   |
| Thailand | Sukhothai | Sawankhalok |  |   |     | 14 |  |   |  |   |
| Thailand | Sukhothai | Sawankhalok |  |   |     |    |  | 1 |  |   |
| Thailand | Sukhothai | Sawankhalok |  |   |     |    |  |   |  | 1 |

**Cluster 10 1450 - 1550 Definite.** We identified a total of 210 sherds that were produced between 1450 and 1550.

| Country | Region   | Sub-Region | Basin | Bottle | Bowl | Dish | Jar | Jarlet | Lid | Vase | Unknown |
|---------|----------|------------|-------|--------|------|------|-----|--------|-----|------|---------|
| Burma   | Kaw Don  |            |       |        | 2    |      |     |        |     |      |         |
| Burma   | Kaw Don  |            |       |        |      |      | 1   |        |     |      |         |
| Burma   | Mon      | Martaban   |       |        |      |      | 132 |        |     |      |         |
| Burma   | Mon      | Martaban   | 1     |        |      |      |     |        |     |      |         |
| Burma   | Mon      | Martaban   |       |        | 10   |      |     |        |     |      |         |
| Burma   | Mon      | Martaban   |       |        |      | 38   |     |        |     |      |         |
| Burma   | Yangon   | Twante     |       |        | 17   |      |     |        |     |      |         |
| Burma   | Yangon   | Twante     |       |        |      | 1    |     |        |     |      |         |
| Burma   |          |            |       |        | 19   |      |     |        |     |      |         |
| Burma   |          |            |       |        |      |      | 4   |        |     |      |         |
| China   | Fujian   |            |       |        | 1    |      |     |        |     |      |         |
| China   | Jiangxi  | Jingdezhen |       |        | 10   |      |     |        |     |      |         |
| China   | Jiangxi  | Jingdezhen |       |        |      | 1    |     |        |     |      |         |
| China   | Zhejiang | Longquan   |       |        | 2    |      |     |        |     |      |         |
| China   | Zhejiang | Longquan   |       |        |      | 3    |     |        |     |      |         |

|          |           |             |  |    |     |    |   |   |   |   |
|----------|-----------|-------------|--|----|-----|----|---|---|---|---|
| Thailand | Sukhothai | Sawankhalok |  | 12 |     |    |   |   |   |   |
| Thailand | Sukhothai | Sawankhalok |  |    | 143 |    |   |   |   |   |
| Thailand | Sukhothai | Sawankhalok |  |    |     | 71 |   |   |   |   |
| Thailand | Sukhothai | Sawankhalok |  |    |     |    | 1 |   |   |   |
| Thailand | Sukhothai | Sawankhalok |  |    |     |    |   | 4 |   |   |
| Thailand | Sukhothai | Sawankhalok |  |    |     |    |   |   |   | 1 |
| Thailand | Sukhothai | Sawankhalok |  |    |     |    |   |   | 1 |   |
| Thailand | Sukhothai | Sukhothai   |  |    |     | 8  |   |   |   |   |
| Thailand |           |             |  |    | 2   |    |   |   |   |   |
| Vietnam  | Hai Duong |             |  |    | 9   |    |   |   |   |   |
| Vietnam  | Hai Duong |             |  |    |     | 1  |   |   |   |   |

**Cluster 10 1450 - 1550 Possible.** We identified a total of 495 sherds that could have been produced between 1450 – 1550.

| Country | Region  | Sub-Region | Bowl | Dish |
|---------|---------|------------|------|------|
| China   | Jiangxi | Jingdezhen | 6    |      |
| China   | Jiangxi | Jingdezhen |      | 1    |

**Cluster 10 1550 - 1650 Definite.** We identified a total of 7 sherds that were produced between 1550 and 1650.

| Country | Region  | Sub-Region | Bowl | Jar | Dish |
|---------|---------|------------|------|-----|------|
| Burma   | Mon     | Martaban   |      | 2   |      |
| Burma   |         | Kaw Don    |      | 1   |      |
| Burma   |         |            |      | 7   |      |
| China   | Fujian  | Zhangzhou  |      |     | 1    |
| China   | Jiangxi | Jingdezhen | 7    |     |      |

**Cluster 10 1550 - 1650 Possible.** We identified a total of 18 sherds that could have been produced between 1550 and 1650.
